# Supplementary material
Source: PubMed Central journal article supplement (PMC5097935)
Supplement: mmc1.pdf [file mmc1.pdf]

## Supplemental Data

### Structural Chromosomal Rearrangements

#### Require Nucleotide-Level Resolution: Lessons

#### from Next-Generation Sequencing in Prenatal Diagnosis

Zehra Ordulu, Tammy Kammin, Harrison Brand, Vamsee Pillalamarri, Claire E. Redin, Ryan L. Collins, Ian Blumenthal, Carrie Hanscom, Shahrin Pereira, India Bradley, Barbara F. Crandall, Pamela Gerrol, Mark A. Hayden, Naveed Hussain, Bibi Kanengisser-Pines, Sibel Kantarci, Brynn Levy, Michael J. Macera, Fabiola Quintero-Rivera, Erica Spiegel, Blair Stevens, Janet E. Ulm, Dorothy Warburton, Louise E. Wilkins-Haug, Naomi Yachelevich, James F. Gusella, Michael E. Talkowski, and Cynthia C. Morton

## Supplemental Note

### Case Reports

#### DGAP239<sup>1</sup>

46,XY,t(6;8)(q13;q13)dn.arr(1-22)x2,(XY)x1.seq[GRCh37/hg19] t(6;8)(q13;q12.2)dn

**Prenatal History:** A 37 year-old G2P0SAB1 female conceived after *in vitro* fertilization (IVF) and had normal first trimester screening. Starting in the second trimester, the following abnormal findings were detected: hypoplastic right ventricle and tricuspid atresia (18.8 weeks), polyhydramnios with a small, intermittently undetected stomach and suspicion of esophageal atresia (27.3 and 30.4 weeks), flexed extremities, protruding upper lip, and micrognathia with initiation of multiple periodic therapeutic amnioreductions (33.3 weeks), and undescended right testicle (35.3 weeks). The differential diagnosis during the prenatal period included arthrogyrosis, Stickler syndrome, and trisomy 18. A sample of the initial therapeutic amniocentesis fluid at 33.3 weeks was collected for cytogenetic analysis and DNA extraction.

**Postnatal History:** At 36.2 weeks, during a therapeutic amnioreduction for polyhydramnios, poor fetal movements were noted and an emergent C-section was performed. The birth weight was 2985 grams (68<sup>th</sup> percentile), length was 45 cm (21<sup>st</sup> percentile), and head circumference was 33.5 cm (78<sup>th</sup> percentile). General examination showed a dusky, lethargic male on the ventilator with generalized edema. The chin was slightly retrognathic and there was a high arched palate. Ears were slightly retroverted with 'snipped off' helix, prominent antihelix and patent canals. Neck was short and edematous. Genitalia appeared male, with an underdeveloped male phallus and impalpable testes. Extremities had low tone with weak grasp and clenched fists with cortical thumb. Skin showed scattered ecchymoses and duskiness. After initial stabilization of respiratory and cardiac status, the newborn was transported to the Neonatal Intensive Care Unit (NICU) for further care. Choanal atresia was confirmed by maxillofacial CT scan. Esophageal atresia and tracheoesophageal fistula were confirmed by chest radiography and CT scan. Bilateral optic nerve hypoplasia was noted on ophthalmic examination, absence of the semicircular canals was detected in the ear complex after CT, and mild bilateral hydronephrosis was noted by ultrasound. Cardiovascular system evaluation with echocardiogram revealed tricuspid atresia, hypoplastic right ventricle, atrial and ventricular septal defects with mostly left to right flow, patent ductus arteriosus, small pulmonic valve annulus and normal branch pulmonary arteries. Neurologically, the newborn initially presented with poor tone and showed signs of encephalopathy (detected by EEG) with intermittent decorticate posturing. Clinical seizure activity was not observed. Cranial MRI suggested malformation of the brain including simplicity of the gyri in the frontal and prefrontal areas and also migrational defects. The infant's cardiopulmonary status started to deteriorate by day 8, and on day 10, the infant was removed from the ventilator to allow a natural death.

The spectrum of the infant's clinical findings detected in the postnatal period was consistent with a diagnosis of CHARGE syndrome.<sup>2-4</sup> Of note, optic nerve hypoplasia can be considered in the spectrum of ocular coloboma, a major characteristic finding in CHARGE syndrome.<sup>5-7</sup> On the basis of the newborn screening and metabolic tests, the presence of any metabolic disease was excluded.

**Sequencing Results and Interpretation of Convergent Genomic Evidence:** Sequencing of the prenatal DNA sample identified the translocation breakpoints directly disrupting *CHD7* at 8q12.2 and *LMBRD1* at 6q13. While biallelic losses of *LMBRD1* are associated with methylmalonic aciduria and homocystinuria, cb1F type (a metabolic syndrome without any phenotypic overlap with DGAP239), haploinsufficiency of *CHD7* is well known to be associated with CHARGE syndrome (mutated in more than 90% of the cases), correlating with the postnatal diagnosis of CHARGE syndrome in DGAP239. An analysis of the protein-coding genes localized in

the same TAD as the breakpoints did not reveal any additional monoallelic or imprinted genes associated with an abnormal phenotype (Figure 2A, Table 4).

### BLA(S)T Outputs of Sequencing Results:

#### Rearrangement\_A (on der(6))

```

1   GTTGTTGTAT   TGCTTTTTGT   GTTTTTTTTA   AATTGTTTCT   TTGTTATCTT   TTATTTTTTC
61  CAAATTATTT   CTGACCCAAA   GTTGGCTGAA   TCCATGGATC   TGGAACCCAT   TAATATGGAG
121 GGCTAACTGT   ATACCCAACT   GCTTATGAGA   CCTCCACCTG   AACATTTTTG   AGACATCTCA
181 AGTCAACTAA   TCATTTTTTT   TTACAATTTT   TCTAACCTTA   GTACTTTTTT   TTTTTTTTTT
241 CCCTGAGACA   GAGTCTTGCC   CTGTCGCCTG   GGTCAGAGTG   CAGTGGCACG   ATCTCAGCTC
301 ACTGCAACTT   CCACCTCCCA   GGTTCAAGTG   ATTCTCCTGC   CTCAGCCTCC   CAAGTAG{CT}T
361 TAAAGTATAT   GCAGAGTCTG   ATACCTTTTC   TCTCCACTTC   TACCACCCGG   GTCCAAGTGG
421 CCTTTTTTTC   TTGCCGGTGT   TACTGCAGTA   GCTCCCCTAC   TGCTCTCCCT   GCTGTTGCCT
481 GTGTTGCCTG   CAGTCTTTCC   AATGTTAGCA   GTCAAAGTCA   TCTCTCAGAG   CCAGAGCTGG

```

| Score | Start | End | qSize | Identity | Chro | Strand | Start    | End      | Span |
|-------|-------|-----|-------|----------|------|--------|----------|----------|------|
| 357   | 1     | 359 | 540   | 99.8%    | 6    | (+)    | 70405510 | 70405868 | 359  |
| 183   | 358   | 540 | 549   | 100%     | 8    | (+)    | 61628671 | 61628853 | 183  |

BLA(S)T Output: 6q13(+)(70,405,86{7-8})::8q12.2(+)(61,628,67{1-2})

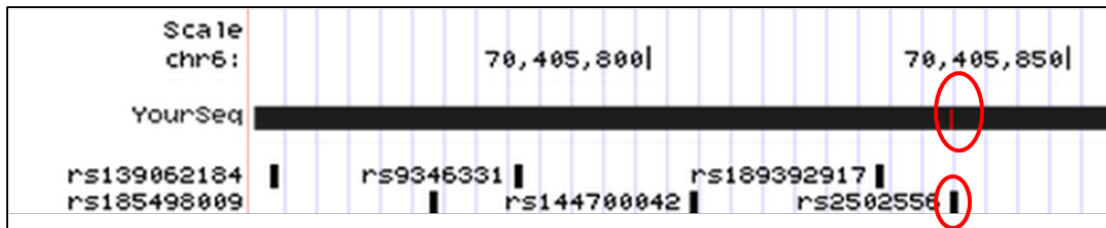

Figure S-DGAP239. BLA(S)T Output, Rearrangement\_A on der(6): Circled mismatch represents a SNP (dbSNP build 141, rs2502556).

#### Rearrangement\_B (on der(8))

```

1   GGGATCCGCC   TGCCTTGGCC   TCCTAAAATG   CTGGGATTAC   AGGCGTGAGC   CACC CGCCCC
61  AGCCCCTTCC   TCTTTTTGGC   TTCCACTTGG   CCAAAGGAGC   TTCCCTTTGG   GGCCCGTCT
121 GAGTCATGTT   AGCCGCTGGT   TCAAGGGAGC   CATCTGAAAC   TCCTTGAGAC   AGGGTTTCTC
181 CTGTATATGG   CAATACTCTA   CCTTAGAAAA   ACAAACAAA   ACAAACAAA   ACGTCAAGTT
241 ACATGGTATA   ATGGAAAAAA   ACCCTAAACT   TGGGCTAGAA   AATATAGGCC   ACTATTTTGT
301 TTCTAATACC   ACTATGTATA   TGGACAGAAC   AGTTAACTGT   CCACGCCCTG   TGTCTTCCTT
361 CGTGAAAGGT   GGTGACACTG   TACCTTCA   GCCTACTTCA   TAGGACTTTG   GTGTAAATG
421 AGACAGCAGA   TGTTAAAGTA   CCTTCCGAGA   CCATTGTTTC   CAGAACCTTC   ATCACATTGT
481 GGTATTAGAA   ACCTTGGAGT   CCTCCTTGAC   TCTTTCACAA   GCTACATTGA   ATTTGTTCTC
541 AAAGCCTCTG   GCT{CTG}GGAT   TACAGGGGTG   CCCACCACC   CTCAACTAGT   TTTTGTATTT
601 TTAGTAGAGA   CAAAGTTTCG   CCATGTTGGC   CAGGCTGGTC   TCAAACCTCT   GACCTAAGGT
661 GATCCGCCTG   CCTCGGCCTC   CCAGTGTATT   TTTTATCTCA   GCTGGTAACA   CCAAATTA
721 TCAAAGTACT   CAGTAACTAG   AGTGTCATGC   TAGAATCTTC   TGTTTCTCTC   ACCATTGCTC
781 TACAACCAAT   CAGAAATTCT   TTCAATTTAC   TTCTTAAATT   GCTTTATTTT   ACACCCTCAT
841 GACCACTGTT   TAGTTCAGGC   TTTCAACTCT   CTTGGATTAT   TTTAGATAGC   TCTCCCTCCC
901 CTAAG

```

| Score | Start | End | qSize | Identity | Chro | Strand | Start    | End      | Span |
|-------|-------|-----|-------|----------|------|--------|----------|----------|------|
| 556   | 1     | 556 | 905   | 100%     | 8    | (+)    | 61628114 | 61628669 | 556  |
| 352   | 554   | 905 | 905   | 100%     | 6    | (+)    | 70405867 | 70406218 | 352  |

BLA(S)T Output: 8q12.2(+)(61,628,66{7-9})::6q13(+)(70,405,86{7-9})

### Next-Gen Cytogenetic Nomenclature:

#### Short System

46,XY,t(6;8)(q13;q13)dn.seq[GRCh37/hg19] t(6;8)(q13;q12.2)dn

#### Detailed System

46,XY,t(6;8)(q13;q13)dn.seq[GRCh37/hg19] t(6;8)(6pter->6q13(70,405,86{7-8})::8q12.2(61,628,67{1-2})-8qter;8pter->8q12.2(61,628,66{7-9})::6q13(70,405,86{7-9})->6qter)dn

## DGAP247

46,XY,inv(8)(q13q24.1)dn.arr(1-22)x2,(XY)x1.seq[GRCh37/hg19] inv(8)(q11.21q24.23)dn

**Prenatal History:** A 41 year-old G3P1TAB1 female had normal first trimester screening (low risk for trisomies 13, 18, and 21, normal nuchal translucency results with normal appearing nasal bone at 12.5 weeks ultrasound). At 16.3 weeks, amniocentesis was performed for advanced maternal age. Pregnancy continued without any complications with normal ultrasound examinations at 32 and 36 weeks.

**Postnatal History:** The mother presented with spontaneous labor at 38 weeks and delivery occurred without complications. The newborn examination was normal. At 31 months of age, the mother reported that her son is healthy and continues to develop normally.

**Sequencing Results and Interpretation of Convergent Genomic Evidence:** Sequencing of the prenatal DNA sample identified the inversion breakpoints within a non-genic region at 8q11.2, and within *KHDRBS3* at 8q24.23, disrupting this gene with consequent decreased RNA expression (Figures S1 and S2). Although *KHDRBS3* (KH domain-containing, RNA-binding, signal transduction-associated protein 3) has a borderline haploinsufficiency index of 10.52%, it is not reported to be associated with an abnormal phenotype.<sup>8</sup> An analysis of the protein-coding genes localized in the same TAD as the breakpoints did not reveal any additional monoallelic or imprinted genes associated with an abnormal phenotype, correlating with the normal clinical phenotype of DGAP247 (Figure 2B, Table 4).

### BLA(S)T Outputs of Sequencing Results:

#### Rearrangement\_A (at proximal breakpoints of inv(8))

```

1   TTTGACAAAC   CTGACAAAAA   CAAGAAATGA   GGAAAGGATT   CCCTATTTAA   TAAATGGTGC
61  TGGGAAAAC   GGCTAGCCAT   ATGTAGAAAG   CTGAAACTGG   ATCCCTTCCT   TACACCTTAT
121 ACAAAAATTA   AATCAAGATG   GATTAAAGAC   TTAAATGTTA   GACCCAAAAC   CATAAAAACC
181 CTAGGAATAA   TGCAAACCTCA   GAGTACGAAT   CTGAAGTCTA   TGCTTTATAC   TACTTAGTTC
241 CAGGGACTAA   TTAGCTTCAG   ATTCCGAAGG   GCAGAAAATT   CCCTCCATTT   TCTCCCATAG
301 CCACCATGAC   AACATCTTAC   TACACCCCAA   TCTGACGGCA   ATGACAGCCA   GCATGGGCAG
361 TTACAAACCA   CAACAAACCA   CTAATGGCAG   CAGAATGTGT   TTACTTGCCA   CAATCCATCA
421 TGCTTTGGGT   TCAGTGCTGT   ATAATGCAAC   TGTAATAATT   ACTGGTTTGA   GAAGAAGATA
481 TTTTCAGACA   GGTCAGACCA   CTGTGCCACA   TGTTTAATGT   AAAAGAAAAG   AGTCCATAAA
541 TATAATCAGC   AACTTTCAA   TATCAGCCAG   TTGCAAAGAG   TATTTAATTA   ATAAATACAA
601 TTCGATAGAG   AAAACCCTTC   AGTTTTGACC   TTTCTTTTTA   ATGCAAAGA   GATACAGGGT
661 TGGGGGGTGG   AGAAAGATAC   TTGATGTCTA   GAAATGCTGA   GAAACAAAA   AAACAAATAA
721 TGATATTGTC   TCCAGGAATA   AGCATGAGAA   CAACAAAGCA   CTACCTGTTA   TTTTACGTAC
781 ATCGTTCTTT   CCTAGATGTT   CTGATGGAAA

```

| Score | Start | End | Qsize | Identity | Chro | Strand | Start     | End       | Span |
|-------|-------|-----|-------|----------|------|--------|-----------|-----------|------|
| 624   | 185   | 810 | 810   | 99.9%    | 8    | (-)    | 136495195 | 136495820 | 626  |
| 184   | 1     | 184 | 810   | 100%     | 8    | (+)    | 51889318  | 51889501  | 184  |

BLA(S)T Output: 8q11.21(+)(51,889,501)::8q24.23(-)(136,495,820)

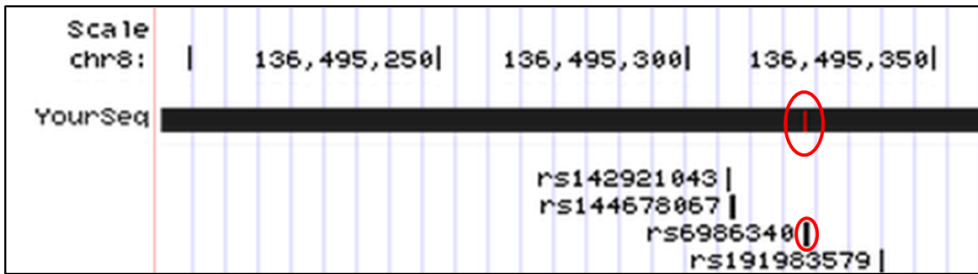

**Figure S-DGAP247. BLA(S)T Output, Rearrangement\_A at proximal breakpoints of inv(8):** Circled mismatch represents a SNP (dbSNP build 141, rs6986340).

**Rearrangement\_B (at distal breakpoints of inv(8))**

```

1  TTGGCTTCTG  TTGCCATTGC  TTTTGGTGTT  TTAGACATGA  AGTCCTTGCC  CATGCCTATG
61 TCCTGAATGA  TATTGCCTAG  GTTTTCTT(TA TTCTT) (TATTC TT) (TATTCTT) (T ATTCTT) TACT
121 TTTCTTTTAT  GAACAGAGGA  GGATATTCAT  GTCATGAGGG  TATCATATCC  TTATGATAGA
181 GGATATTTGT  GTGATGAGGG  CATCAGCCTT  AGGTGCCTGG  TTCTGTCCCC  TGCATGGCTT
241 CCTCCTGTCC  ATCTGCCGTC  TCTTGCAGGG  CTGAACTTAC  TCTTCCAGAT  TTGGAGATAC
301 TTGGAGTGTT  TGATGCTTGA  ATCCTGTCAT  GACCTGCTTA  TTCTCTCTCC  CTATCTAGGG
361 CTGTTGGGAC  TGTCTGTTTC  TGGGCCTGGA  CAGGACATTT  TTAGATATGT  TTAGAGCATA
421 AATGAAGAAT  TCCCATTGGT  TTTGATGTAA  GATGACTTTG  AATGTTCACT  ATTTTTGGAA
481 GACAGGATAG  CATGGTGATG  AAGATGAGGC  CTCTGGAATT  GGACCGCTTA  GGTTTGGGTC
541 TGTCTTATCC  CTGTGGCTTA  CTAGCTGTAT  GTCCTGGGGG  AAGTAATTTA  ACCCCTCACT
601 ACCTACATTT  CCTCAGTAAA  TTAGAGGTAA  AATGTGGAAT  AGGTAAAAAT  AACCACCACA
661 AAGAGTTAAT  GTGAAGTAAT  ATGCTAACAT  ATGTAAAGCA  TTGAGAAATA  AAAATAAAAT
721 CCTAAGCCAC  CCAACTGACT  GGGTAGACCC  CTCTTG

```

| Score | Start | End | Qsize | Identity | Chro | Strand | Start     | End       | Span |
|-------|-------|-----|-------|----------|------|--------|-----------|-----------|------|
| 648   | 109   | 756 | 756   | 100%     | 8    | (+)    | 136495815 | 136496462 | 648  |
| 88    | 1     | 88  | 756   | 100%     | 8    | (-)    | 51889502  | 51889589  | 88   |

BLA(S)T Output: 8q11.21(-)(51,889,502)::TATTCTTTATTCTTTATTCT::8q24.23(+)(136,495,815)

or

BLA(S)T Output: 8q11.21(-)(51,889,502)::8q24.23(136,495,816-136,495,822)x4::8q24.23(+)(136,495,823)

**Next-Gen Cytogenetic Nomenclature:**

*Short System*

46,XY,inv(8)(q13q24.1)dn.seq[GRCh37/hg19] inv(8)(q11.21q24.23)dn

*Detailed System*

46,XY,inv(8)(q13q24.1)dn.seq[GRCh37/hg19] inv(8)(pter->q11.21(51,889,501)::q24.23q11.21(136,495,820-51,889,502)::TATTCTTTATTCTTTATTCT::q24.23(136,495,815)->qter)dn

or

46,XY,inv(8)(q13q24.1)dn.seq[GRCh37/hg19] inv(8)(pter->q11.21(51,889,501)::q24.23q11.21(136,495,815-51,889,502)::q24.23(136,495,816-136,495,822)x4::q24.23(136,495,823)->qter)dn

## DGAP248

46,XY,t(2;13)(p13;q14)dn.arr(1-22)x2,(XY)x1.seq[GRCh37/hg19] t(2;13)(p12;q13.2)dn

**Prenatal History:** A 44 year-old G1P0 female had normal first trimester screening. At 10.9 weeks, CVS was performed for advanced maternal age. At 17.3 weeks, fetal ultrasound was interpreted to be normal. At 19.4 weeks, the pregnancy was terminated prior to an appointment to receive the results of sequencing. The mother stated that she decided to end the pregnancy as the couple was conflicted about continuing the pregnancy for personal and psychosocial reasons, and that it was a multi-layered decision. No fetopsy was performed.

**Sequencing Results and Interpretation of Convergent Genomic Evidence:** Sequencing of the prenatal DNA sample identified the translocation breakpoints within a non-genic region at 2p12, and within *RFC3* at 13q13.2, disrupting this gene with consequent decreased RNA expression. *RFC3* encodes the 38 kDa subunit of replication factor C complex,<sup>9</sup> with a predicted haploinsufficiency index of 4.93% (likely to be monoallelic)<sup>8</sup>, however without any known abnormal phenotypic associations. In addition, 13q13.2 breakpoints are 973 kb upstream to *NBEA*, a candidate haploinsufficient gene for autism based on animal models and disruption in a patient with idiopathic autism,<sup>10-12</sup> located within the same 2.16 Mb TAD with the breakpoints. The 2p12 rearrangement is located within a TAD that includes *LRRTM4*, a gene with low haploinsufficiency index with no reported abnormal phenotypic association. However, structure and expression profiles of *LRRTM* mRNAs in mice suggest a role in development and maintenance of the vertebrate nervous system.<sup>13</sup> These sequencing results remain of unknown clinical significance, as the pregnancy was terminated and an assessment of potential autism-like behavior would not have been possible in a fetopsy had it been performed (Figure 2C, Table 4).

### BLA(S)T Outputs of Sequencing Results:

#### Rearrangement\_A (on der(2))

```

1 AAATTTGTAC GGTGGGTGAA CTGTGAGCTG GAGTGTTTGA GTTTGACCTG GTAAAGTCAA
61 CACAATGCCG GCATTAGTAT TCAGATGAAA TCTCAGCTCC TGTGAACAAG CTGCCATGCA
121 GTCAATTTGT CAAGATAAAA CTTCAGAGCC TTGTTCTGTG TCTCTTCTCT TTAATAACCA
181 GAACTTCCAA GACAACGTAA GAGGCAATTT CAAGGATATT GACGACAATC TTCTTTCTGA
241 AAGGGTTGCA CTGAATATAC TGGCAAAGTG CTTAGTCAAG CACTTTATAA TTTACAAAGT
301 GTCCTCTCCG AATTTTGCTG TTTGGTCTGC ACAATCATTT CTTGGAGTTG AGAACATTTT
361 TCAACAATGT TGGATACTAA TTATTCTACT GATTATTAAG TACTTCATGC A{TG}TAATCCC
421 AGCACTTTGG GAGGCTGAGG CGGGCGGATC ACAAAGTCAG GAGATCGAGA CCAACCTGGC
481 GAACACGGTG AAACCCCGTC TCTACTAAAA ACACAAAAAA AATTAGCTGG GCGTGGTGGC
541 GGGCGCCTGT AGTCCCAGCT ACTCGGGAGG CTGAGGCAGG AGAATGGTCT GAACCCGGGA
601 GGCGGAGCTT TCAGTGAGCC GAGATCGCGC CACTGCAGTC CAGCCTGGGC GACAGAGATG
661 GACTCTGTCT CAAAAAATA AAATAAATA AAATAAATA AGGGATATTA CAGAAATAAC
721 AGGCCTAGAG TTCT

```

| Score | Start | End | Qsize | Identity | Chro | Strand | Start    | End      | Span |
|-------|-------|-----|-------|----------|------|--------|----------|----------|------|
| 411   | 1     | 413 | 734   | 99.8%    | 13   | (-)    | 34542731 | 34543143 | 413  |
| 317   | 412   | 734 | 734   | 99.1%    | 2    | (+)    | 78301911 | 78302233 | 323  |

BLA(S)T Output: 13q13.2(-)(34,542,73{2-1})::2p12(+)(78,301,91{1-2})

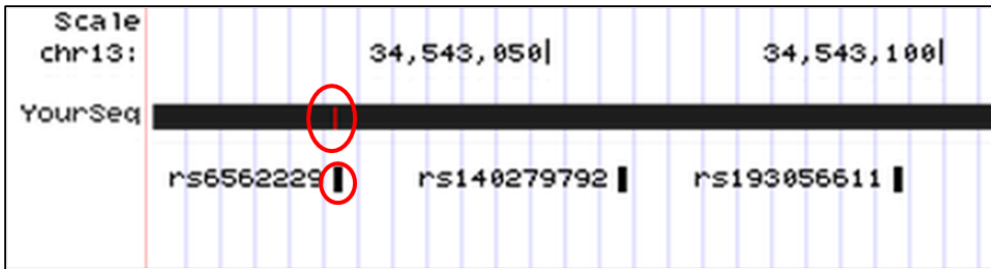

**Figure S-DGAP248\_1. BLA(S)T Output, Rearrangement\_A on der(2):** Circled mismatch represents a SNP (dbSNP build 141, rs6562229).

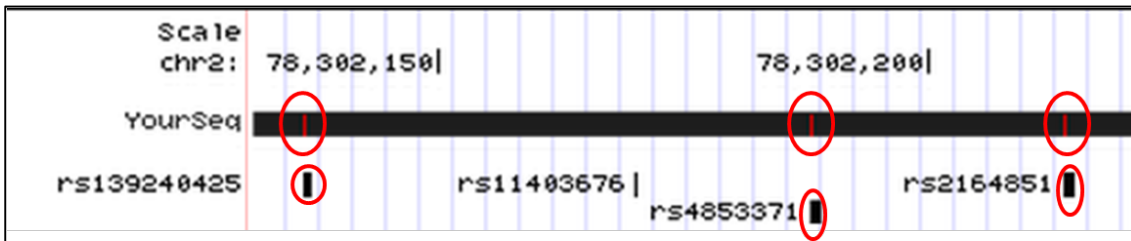

**Figure S-DGAP248\_2. BLA(S)T Output, Rearrangement\_A on der(2):** Circled mismatches represent three SNPs (dbSNP build 141, rs139240425, rs4853371, and rs2164851).

**Rearrangement\_B (on der(13))**

```

1   CACCTGGCTA   ATTTTTGTAA   TTTTCGTAGA   GACGAGGTTT   CACAATGTTG   GCCAGGCTGG
61  TCTCAAACCTC  CCGACCTCAA   GTGATCCTCC   CACCTCGGCC   TCCTGCAGTG   CTGGGATTAC
121 AGGTGTGCCA   CCACGCCTGG   CCCAGCATTT   ACTCTTTACA   AATGTAGCTG   AGAACATGGG
181 GATCAGATGG   TAATTTAACT   AAATGATCAA   CGAGTAGGTT   CACAGAATGA   AGGACAACCA
241 GACTTTACCA   AAGCTTAGGT   TGCCTTGTTT   TTAGCCAATC   AAACAATCAA   AAGTTTTTC{T
301 GTG}AGCCACC  GTGCGCCCGG   CCTGTAATAT   CTCTTTGTTG   ATTAGCCTCC   TAGCCATATC
361 CCCGCTACTG   AATTATCTAT   CTTCCCCTTT   TATCTAAATT   CTCTGCTGCA   TCATTTTAAT
421 CATTCTCTTG   CCAACATCTC   AAATTCTTTT   CCTTATTTGC   ATGCCTATTA   CATGCTGCCA
481 GTTAAACTGT   GATTTTGTAA   AAGTCTAAAT   GTTGGCTTCT   CAGCTTTTCC   ATCTAGCTTT
541 CAAAAGCCAC   TGGAAAAAAG   AACAACHTTA   AGTTTTATTG   TATTCTTAAT   TGACAAATAA
601 TGATTGCACA   TATTTATTAA   GTAAGACTGG   TGGTATTATG   CTGCCCATGT

```

| Score | Start | End | Qsize | Identity | Chro | Strand | Start    | End      | Span |
|-------|-------|-----|-------|----------|------|--------|----------|----------|------|
| 351   | 300   | 650 | 650   | 100%     | 2    | (-)    | 78301558 | 78301908 | 351  |
| 301   | 1     | 303 | 650   | 99.7%    | 13   | (+)    | 34542421 | 34542723 | 303  |

BLA(S)T Output: 13q13.2(+)(34,542,7{20-23})::2p12(-)(78,301,90{8-5})

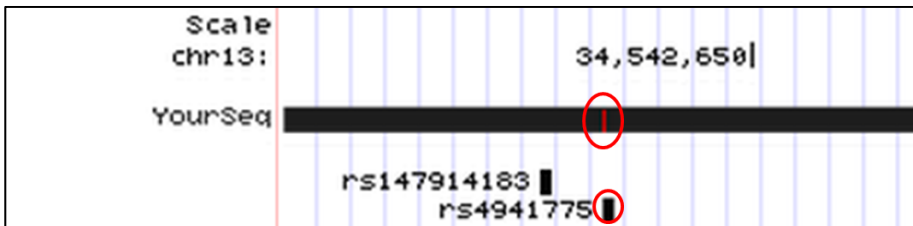

**Figure S-DGAP248\_3. BLA(S)T Output, Rearrangement\_B on der(13):** Circled mismatch represents a SNP (dbSNP build 141, rs4941775).

**Next-Gen Cytogenetic Nomenclature:**

*Short System*

46,XY,t(2;13)(p13;q14)dn.seq[GRCh37/hg19] t(2;13)(p12;q13.2)dn

*Detailed System*

46,XY,t(2;13)(p13;q14)dn.seq[GRCh37/hg19] t(2;13)(13qter->13q13.2(34,542,73{2-1})::2p12(78,301,91{1-2})->2qter;13pter->13q13.2(34,542,7{20-23})::2p12(78,301,90{8-5})->pter)dn

## DGAP258

46,XY,inv(6)(p23q13)dn.arr(1-22)x2,(XY)x1.seq[GRCh37/hg19] inv(6)(p25.3q16.1)dn(q15q15)pat  
or  
46,XY,inv(6)(p23q13)dn.arr(1-22)x2,(XY)x1.seq[GRCh37/hg19] inv(6)(p25.3q16.1)dn,inv(6)(q15q15)pat

**Prenatal History:** A 28 year-old G1P0 female conceived after IVF and had abnormal maternal first trimester serum screening with an increased risk of chromosomal abnormality. Amniocentesis was performed at 15.9 weeks and the twins were determined to be monozygotic based upon SNP microarray results. The twin fetuses had normal ultrasound findings at 12 and 20 weeks.

**Postnatal History:** The twins were born prematurely at 33 weeks by C-section due to breech/breech presentation. Birth weights were 3 pounds 3 ounces and 3 pounds 4 ounces. They spent one month in the NICU for growth monitoring and did not require intubation nor have any illness or major complication during the NICU stay. At 2.5 years of age, the mother reports that the twins continue to be healthy without any hospitalization or developmental delay.

**Sequencing Results and Interpretation of Convergent Genomic Evidence:** Sequencing of the prenatal DNA sample identified the inversion breakpoints in non-genic regions at both 6p25.3 and 6q16.1. In addition, a paternally inherited cryptic rearrangement at 6q15 was identified. Due to the length of the sequencing reads, it was not possible to determine whether both of the breakpoints on 6q reside in the same paternally inherited chromosome, however, given their relative close proximity and localization within the same 2.21 Mb TAD, this is a likely possibility. An analysis of the protein-coding genes localized in the same TAD as the breakpoints did not reveal any additional monoallelic or imprinted genes associated with an abnormal phenotype, correlating with the normal clinical phenotype of DGAP258 (Figure 2D, Table 4).

### BLA(S)T Outputs of Sequencing Results:

#### Rearrangement\_A (on proximal part of inv(6))

```

1      TCTGCACTCT   CATGTTTGTT   GCAGCACTCT   TCACAATAGC   CAAGATTTGG   AAGCAACCTA
61     AGTGGCCAGG   AACAGATGAA   TGGATAAAGA   AAATGTGGTA   CTTATACACA   ATGGAGTAC{T}
121    GGAAGACCAC   AAAAAGCACC   CTCCCTGAGA   GCAGGCCTCT   CCCAGTGAAA   TGCAAGTTCC
181    AGGAAATGAC   TGAGTTGTCC   CATGTGCAGC   CGAGTCCATC   ATGAGGTGCA   GGGAGATT

```

| Score | Start | End | Qsize | Identity | Chro | Strand | Start    | End      | Span |
|-------|-------|-----|-------|----------|------|--------|----------|----------|------|
| 120   | 1     | 120 | 238   | 100%     | 6    | (-)    | 93191547 | 93191666 | 120  |
| 117   | 120   | 238 | 238   | 99.2%    | 6    | (+)    | 776786   | 776904   | 119  |

BLA(S)T Output: 6q16.1(-)(93,191,54{7}>::6p25.3(+)(776,81{6})

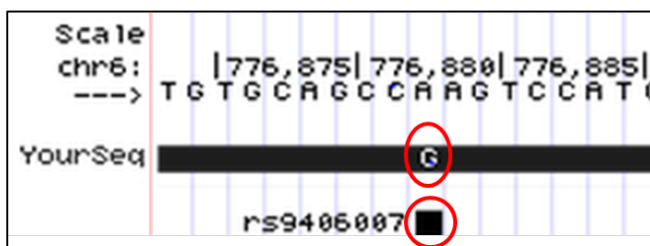

**Figure S-DGAP258\_1. BLA(S)T Output, Rearrangement\_A on proximal part of inv(6):** Circled mismatch represents a SNP (dbSNP build 141, rs9406007).



### Rearrangement\_B (on distal part of inv(6))

1 GTTGTTGCAA ATGACTGAAT CTCATTTATT TTTATGTTTG AGCATGTACA GCTAATTAAG  
61 ATTCTGACTG GGTTTAGGAT CAAAGAAAGC TGTCCCATTG CATTCCCACA TTCTTCCTTC  
121 TTCTTTCAAT GTCTTCCAAG ATCTATTTTA AACGGGAAGT GTTGTGTACT TTTCAGGGGC

| Score | Start | End | Qsize | Identity | Chro | Strand | Start    | End      | Span |
|-------|-------|-----|-------|----------|------|--------|----------|----------|------|
| 138   | 43    | 180 | 180   | 100%     | 6    | (-)    | 776650   | 776787   | 138  |
| 42    | 1     | 42  | 180   | 100%     | 6    | (+)    | 93191504 | 93191545 | 42   |

BLA(S)T Output: 6q16.1(+)(93,191,545)::6p25.3(-)(776,787)

### Rearrangement\_C

Cryptic inversion spanning 6q15(92,254,978~92,235,543~)

#### Next-Gen Cytogenetic Nomenclature:

##### Short System

46,XY,inv(6)(p23q13)dn.seq[GRCh37/hg19] inv(6)(p25.3q16.1)dn(q15q15)pat

or

46,XY,inv(6)(p23q13)dn.seq[GRCh37/hg19] inv(6)(p25.3q16.1)dn,inv(6)(q15q15)pat

##### Detailed System

46,XY,inv(6)(p23q13)dn.seq[GRCh37/hg19] inv(6)(qter->q16.1(93,191,54{7})::p25.3q15(776,81{6}-92,235,543~)dn::q15(92,254,978~92,235,543~)pat::q15q16.1(92,254,978~93,191,545)dn::p25.3(776,787)->pter)

or

46,XY,inv(6)(p23q13)dn.seq[GRCh37/hg19] inv(6)(qter->q16.1(93,191,54{7})::p25.3q16.1(776,81{6}-93,191,545)::p25.3(776,787)->pter)dn,inv(6)(pter->q15(92,235,543)::q15(92,254,978-92,235,543)::q15(92,254,978)->qter)pat

## DGAP259

46,XX,t(3;18;5;7)(p25;p11.2;q13.3;q32),t(9;18)(p22;q21)dn.arr(1-22,X)x2.seq[GRCh37/hg19](3,5,7,9,18)cx,der(3)t(3;7)(p24.3;q36.3)dn,der(5)t(5;7)(q14.3;q35)t(3;7)(p24.3;q36.3)t(3;18)(p26.3;p11.31)dn,der(7)t(5;7)dn,der(9)t(9;18)(p23;q21.3)dn,der(18)t(3;18)inv(18)(p11.31q21.3)t(9;18)dn

**Prenatal History:** A 28-year-old G1P0 female had abnormal fetal imaging findings of bilateral ventriculomegaly and colpocephaly, with partial agenesis of the corpus callosum observed by ultrasound and MRI. Amniocentesis was performed at 21 weeks. The pregnancy was terminated at 22 weeks due to the abnormal imaging findings. Fetal autopsy showed microencephaly (40 g vs normal 75 g for the gestational age), ventriculomegaly, agenesis of the corpus callosum, left renal aplasia and hypoplasia of the right kidney.

**Sequencing Results and Interpretation of Convergent Genomic Evidence:** Sequencing of the prenatal DNA sample identified all of the breakpoints of this complex aberration with nine rearrangement sequences located at 3p26.3, 3p24.3, 5q14.3, 7q35, 7q36.3, 9p23, 18p11.31, and 18q21.3. An analysis of the protein-coding genes localized in the same TAD as the breakpoints revealed multiple genes associated with phenotypes overlapping with DGAP259. In particular, the breakpoints at 7q36.3 disrupt the regulatory region of *SHH* that is associated with holoprosencephaly (Supplemental Table 2), which is consistent with the cerebral malformation phenotype of DGAP259.<sup>14</sup> The breakpoints at 5q14.3 are located within the same TAD as *MEF2C*, a haploinsufficient region associated with cerebral malformation and hypoplastic corpus callosum,<sup>12; 15</sup> as observed in DGAP259. Furthermore, two well-known genome organizer and chromatin regulator protein encoding regions, *SATB1*<sup>16; 17</sup> and *EZH1*<sup>18</sup> reside in the vicinity of *TBC1D5* and *CNTNAP2*, which are disrupted in the respective breakpoints at 3p24.3 and 7q35 and might be relevant to the complex chromosome aberration of DGAP259 (Figure 3, Table 5).

### BLA(S)T Outputs of Sequencing Results:

#### Rearrangement\_A (on der(3))

|     |            |            |            |            |            |            |
|-----|------------|------------|------------|------------|------------|------------|
| 1   | TGCTCGTCCC | ACCCCAGCGT | GGGGTGTGGA | GAGGTGGGCC | AGTAGGAGGG | GTTTGGCTGT |
| 61  | GGAGGCAGCT | TCCTCCCAAA | TGGTTTAGTG | CAGTTCTCCC | ATAGTGCCTG | AGGTCCCCCT |
| 121 | CTCTAGAGAC | GATTCATTCT | GGCCGACTTA | CATTCATTTG | TTAAAAAGCC | AGGACACCCC |
| 181 | TTGAGTTTCC | CCTCACTGAA | GGCATCTTGT | TCCCCTTTGT | CCTTCCCCAC | CATGTTATGA |
| 241 | GGAAGCACAA | GAGGTCTCCC | CAGAAGCCTG | GGCCATGCCC | TTGAACTTCT | CAGACTGGAG |
| 301 | AACCGTGAGC | AAAATATACC | TTTTTCTTT  | ATAAATTACC | CAGTCTGAGG | TATTATTTTA |
| 361 | TAGCAAGGCC | CATCCAACAA | GTTTATGCTA | CTTAAATAAA | GTTCCTTTCA | ATAAAAGATG |
| 421 | CCACAGTGGC | ACACAGTTAA | CTATGAGGAA | ATTTTTTTAA | CTATATTTAT | TTTTGTGTCA |
| 481 | AAGGCTTAGG | TGTGCATTAG | ACAACCATTT | ATTAATTTTA | ATTTTGCTTG | GAATAAACAC |
| 541 | CCTGACAAAC | AGCATTTCAA | TTCAGGCTGC | TATACAACAG | AATCATTTAC | TTTCAGATAC |
| 601 | AATCATGCAG | TAACACCACA | AGCTCCTGCT | TCACAAATTG | CTCAATCCCC | AATCCCCAAA |
| 661 | TACTATAGAA | GATGGCTTAT | ATATAAGTTA | TACAAGACAT | GCATTCTAAT | ATTCAAGCCA |

| Score | Start | End | Qsize | Identity | Chro | Strand | Start     | End       | Span |
|-------|-------|-----|-------|----------|------|--------|-----------|-----------|------|
| 363   | 1     | 367 | 720   | 99.5%    | 7    | (-)    | 155701797 | 155702163 | 367  |
| 353   | 368   | 720 | 720   | 100%     | 3    | (+)    | 17392144  | 17392496  | 353  |

BLA(S)T Output: 7q36.3(-)(155,701,797)::3p24.3(+)(17,392,144)

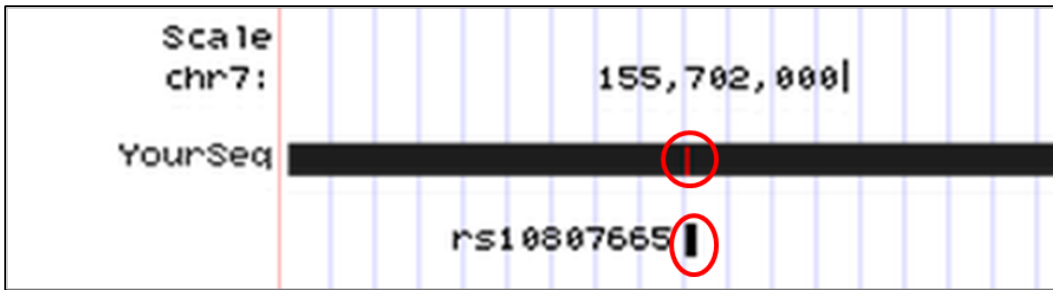

**Figure S-DGAP259\_1. BLA(S)T Output, Rearrangement\_A on der(3):** Circled mismatch represents a SNP (dbSNP build 141, rs10807665).

**Rearrangement\_B (on der(5))**

|     |                 |            |            |            |            |            |
|-----|-----------------|------------|------------|------------|------------|------------|
| 1   | AGCAGTAAAA      | GGCACTAGCT | GGGTAGGTAG | TTATCAAGAA | TGACAAATAT | CCTAAAGTTG |
| 61  | TTAAATCTCC      | CATTCTGAGG | AGTTGAAGTG | GGAAATGGAG | AGATTATTCA | ACTCTATCAA |
| 121 | CATCTGATAC      | AGTAATTTGA | CTTACTTAAT | CATTATGTCT | CATCTTCCAT | TATTAATTTA |
| 181 | AACAATTTTG      | GAATTTATGT | ATTACGAAT  | CAGACTTGTG | TGATAGTAAA | TACGCATTAA |
| 241 | AAATAGTATT      | TTGTGGAATA | TTTCAGAACT | TGTACTTTTT | ACCATTTGTT | CTTAGGCAGG |
| 301 | TAGAATCAAG      | TAGTTCACTA | AGGCTTGAAT | AATAGAGGGT | AAACCTCCTA | GTTCTAAGAT |
| 361 | GTCTGATATC      | TGCTCTGTAA | AAAAATAAAA | TAAAATCACC | CAAATTTTAC | TACAATAAAA |
| 421 | CAAGAGCCAT      | TTTATTATGC | TCAAACAATC | CATGGGTCAG | AACAAGGCAG | AGTGGATATG |
| 481 | GCTTATTCTA      | TTATCATGCT | CTATGTCTGC | AGCATTAAAT | GAGGAAACTC | AAATGATGGA |
| 541 | GATTACCAGT      | GTTGCTGGGG | TGTGGAATGA | GCTAGAAGCT | CGTTCATTCA | CATAAATGTT |
| 601 | GCC{TGCTCCA AA} | GCTGTACC   | GAGTCAGTGG | CGGAGGCCGG | GTGAGCGTGG | GGAAGGGCAT |
| 661 | CAGACACGGT      | ATACCTGCTC | CACCTTTCCC | TTTTGTTTTG | TTGTCACAAG | AGGCACTACT |
| 721 | TCGCTGCCTC      | CGTCTCCTCT | GTGGGTGGAA | AGGATGGACC | CAAAGGAACA | GAACGCTGTG |
| 781 | GCCACTCGAC      | GATGGTTTTG | ATAGGGACTT | ATCTTGCTCT | CTCTCCCTGG | ACACTCT    |

| Score | Start | End | Qsize | Identity | Chro | Strand | Start     | End       | Span |
|-------|-------|-----|-------|----------|------|--------|-----------|-----------|------|
| 611   | 1     | 612 | 837   | 100%     | 5    | (+)    | 88755635  | 88756256  | 622  |
| 232   | 604   | 837 | 837   | 99.6%    | 7    | (+)    | 147718911 | 147719144 | 234  |

BLA(S)T Output: 5q14.3(+)(88,756,2{48-56})::7q35(+)(147,718,91{1-9})

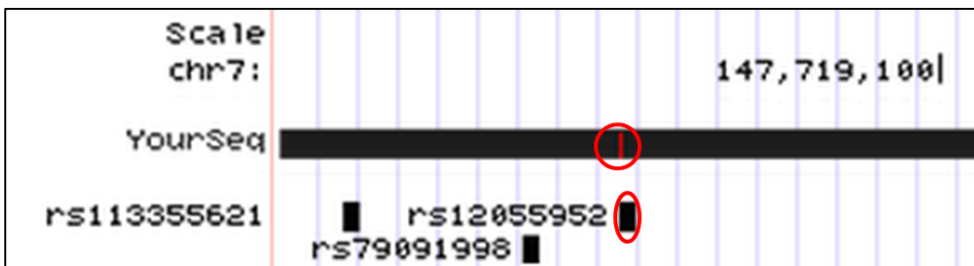

**Figure S-DGAP259\_2. BLA(S)T Output, Rearrangement\_B on der(5):** Circled mismatch represents a SNP (dbSNP build 141, rs12055952).

**Rearrangement\_C (on der(5))**

|     |            |            |            |            |            |            |
|-----|------------|------------|------------|------------|------------|------------|
| 1   | GGCCTCACTC | AGTGCCCTCG | GGTCTGGAGA | CATGAATCAC | GAACCCTCCC | ACCAGCCCCA |
| 61  | GGATTTGGTC | AGTTATAAAA | ATATCCGGAT | TTGGCATGGG | GCGGATTCAG | GAACCGAAGT |
| 121 | TTGCTCTTGC | CCTGTTCTTG | CAGTATTGGA | TTGTACAATT | ATAGCTCTTT | AGAAGTTTCC |
| 181 | TAATATGCCA | CAAGATGTCA | AGCAGCAGCA | CCAAGATTAA | TACTTTTTTT | AATGACCATT |
| 241 | GCTGACTTTG | ACCTTGAAGT | GTGTGGTGTG | TTCTGAGAGC | ATATTTCTCT | CCCTCTGCTT |
| 301 | TGCAGCTCCT | GGATTTTGAA | AAATTAACTC | CTTGCTCTCA | TCTGAACAGT | TCACCTAAGG |
| 361 | TGTTCACTTG | TTCTGTTTAC | CTTGAGCTAA | AGTGTTTTAT | AGAGAGAGGG | AGAGGGAGGA |
| 421 | GGGAGGTAGA | GAAAAGGAGA | GGGGAGGTGG | AGAGGTAGGG | GGAGAGGAAG | GAAGGTGGGA |
| 481 | AGGAAGGGGA | GGGAGAGGTA | GGGAGAAGGG | GAGAACAAAT | GATGATTTGT | TAATGCAAAT |
| 541 | GTGTCGCGAA | TGACTGGTAG | TACATCTGTC | TCTTCATCCA | TAGGCCATTA | CTGAGCAACG |
| 601 | TTAGCACATG | ATTGTAAAAA | AGGAGAAATC | ATTACATGCA | GGTAGTACAC | ATTCAATCAA |
| 661 | TTCTGAGCTT | ATGTCTCTGG | TGAAATAAAA | AAGTATATAA | TGTAAATGAT | ATTTAATCTG |
| 721 | AATAACAAAA | AAGCAGCTCT | TTGACTCTGG | CTCAAGCTGT | TAGGTGAGGT | GACTGCTGTT |

```

781 TGGGATTGAT GTTTATTGGT GGCCAGTGG GGAAAGGCTA TCACTTTTAT TCTTTGTCAT
841 TCCTCCCATG CGTTTCTCTA ACCCACATCA TATTTTAAGT TCTGTTTTCC TTTTTTTTCT
901 TATCTATTTT TTTCTTTTCA TTATTTCTTT CTTTTGGGGA GTAGTTTGTG GGATAGTGGT
961 AAAAAATGGG TGCTGATGAC CACCAGTGTG AGCATGCTAA GCAAGCAATG ACAATTAATA
1021 CAACAACAAC AAAAGTTGTA CGATTAGCTT CAGCTCCATA AGTGTCTAAT GAGCCATTTG
1081 TCAGTCTTTT GGTGAAATAA ACTACTCTAT CTTAATTCTC CACTCTTGCA GTAAATAAAT
1141 AAAAGTTATG AAACACCCGG GCAACAATAA AATATAATTT ATTTTCATAGG GCATGACAGA
1201 ACTCTTTACA TATCTAAAAT GAACATGTTA TTTACAAATG ACTTGTGATA CTCATATAAA
1261 CCATGGATCT GTGTGTTAAC TGCTTTCATT AGGGAGATAT GCATTTTTTTT CCTAATTGTT
1321 TAATCGTTTA AATGTATCAT TACTCCTAAA GGCATGTGAG TTAAAGTGAC TTCTCTTGGT
1381 GCGATTAACT CATAAGGCTA AGAAGAACCT CAGAAATGAG CTCTTCTGCA GCTGAAGACA
1441 TTAAGAATTT AATGGAAAGG ACAAACAAT AATTTTCATT TGGGAACCTC TCAGCTCTCT
1501 GCTGATTATC TTCCTGCCTT TATTTATTTT TAGGAACCCC A

```

| Score | Start | End  | Qsize | Identity | Chro | Strand | Start     | End       | Span |
|-------|-------|------|-------|----------|------|--------|-----------|-----------|------|
| 511   | 1     | 511  | 1541  | 100%     | 7    | (+)    | 155700363 | 155700873 | 511  |
| 1025  | 517   | 1541 | 1541  | 100%     | 3    | (-)    | 17391112  | 17392136  | 1025 |

BLA(S)T Output: 7q36.3(+)(155,700,873)::AGAAC::3p24.3(-)(17,392,136)

### Rearrangement\_D (on der(5))

```

1 TTTCTATGGC TGCTACCACC ATTATCTCCA TCCCTTTAAG AGGCCCAGGT TCTGATGTGC
61 CCATGCCCTC AGGACTCCAG GACTATGACT ACCCAGGCAA GCATGTGCAC ACCTGCACAC
121 CACACCAACT GCTGTGCACG CATGCCGACT GCTGGGTCTT TAAGCCTGAA CTTGTGTGTG
181 CAGGAGCTGC CACATATGCA TGTGGGTATG GTGAAGCAGC AGCAGCAGCA GCTCATGCAC
241 ACACAGGTTA CAAATAAATT CTTAATCATT TTACCTCTCA ATTTGTGTTT AGTATGTACA
301 AAACACAAAT TGAGAGGTAA AATGATTAAG AATTTCAAGA CAGTCACAGC AGAATATTTT
361 AAACATGGGG ACTTCCTCAG CACAGGGCTC TGTGTGACTG GATTGTATGT CCATGAAACC
421 AGCTCTGGAT GTCACGCTAA GAAATATATT CTTACATAGT AGAGAGTAGC ATAGTAAAGA
481 GTAGCATGGT GGTTATCAGA GGCTGGTGGG AG{G}CAGCCCG AGTTTCCCAA TGCACCAAAG
541 CAGAAGCTTT TTGGAAACCT ATATATTTTT TCATACTATT GGAATTTCT TCAGAATATG
601 AAGGCTTTAT CGAATTGTGT CTGAAATGAA TTTTATTTAA ATACTGAATT AATTGAAAGC
661 TTTGCTTCTG AATATTTTTT CATAGATTTT ACGGTGCTTT AGAAATTTCA TTTTGCCTCA
721 TGTTTTAGTA CTGGCAATAA CTGCCAGTAA TAGAAGTGGC AGTGTGAGG GAAATGGTGG
781 TGGCGAGTGT GGGATGGTCT CAGTGGGCAG CTTTCTTACG ATGAGGAGAG GCGGGGCGTG
841 ACTGGTTCTA TCGTGTTTTC ACTGGGACCA GGACTCACTG TGGAAGGGCA GGAAGTACCA
901 CTTAGTGGTG AGAACAGCAC GCAGGCTCCA GTTTACCATT CTGGTGATTT GACTTTAATG
961 AAGCCCTTTG GAATTTTGAC TG

```

| Score | Start | End | Qsize | Identity | Chro | Strand | Start   | End     | Span |
|-------|-------|-----|-------|----------|------|--------|---------|---------|------|
| 470   | 513   | 982 | 982   | 100%     | 18   | (-)    | 6374582 | 6375051 | 470  |
| 513   | 1     | 513 | 982   | 100%     | 3    | (-)    | 1408996 | 1409508 | 513  |

BLA(S)T Output: 3p26.3(-)(1,408,99{6})::18p11.31(-)(6,375,05{1})

### Rearrangement\_E (on der(7))

```

1 GTAGACTGTT GAGTGAATTT CTAATAATAA AGCCAAAAGG AAAAAAATG GCAATATGAT
61 TGGACAAGCA GTTTCAGAAT CAAGGTAGGA TGCCTTTTTG TTGGTGGAGG TTTTTTGTGT
121 TTGTTTTGTT TTTGGACTTA TTCTCCCTCA TATCAAATAA ATTTATTAAT CACACCTGAA
181 CACTTGTTAT GTGCCACTGT CGGCCACGTA TTAGGGACAC GGAAGAACAA TAAGACATAC
241 TCCCTACCAA AAGAGGCTTA TGGTTTAGAA GGAAGACACA GTCTTGTAAT CAGGTAAGTA
301 AAATAAAATG TGAGCTGCAC TATGCTGGAA GTCAGCCCAG GGTGGCCCAA GTAGACCATA
361 GCCAGTCTAC ATAAATAGGG AGACAGGGGG GACAGCTTTC TAGATGTCCC TAAGCCTGAA
421 TCCTAAAAGA TGAGAAGCAT TTCTAGGGTG CCAGAGTGGA GAAAACACCT GACTTGTGGG
481 AGAACGGAAG GCCTCGTGTT CATTCAATGG ATCAACTATC ATTGGGCATC TCCACCTGCG
541 AGAGACGGCG CTAGCCCCTG GGGATCCAGT CCCCGGTGAG CTGGAAAGCT ACTCTGTGCT
601 CTCAGAGGAC TTGGAACAGA GAATGCAGAC AGGGTGGCAG GAATGCAGGA ATGTGCTCAC
661 AGTGCAGGAA CCCGGTGGCT CGCAGAGAAG GGCACCAAAC TTAGACCTGG GAGATCAGGA
721 CCCTCTCCCC CAAAACCTGG A{GG}TTGGAAT ACCTCCAAAT CTGAACTCAG CTTTGACTGT

```

```

781 CAATGGAGTG CAGCTTGTGA CCTCTCCATG TAGTTTGAGC CTTTCAAAAA ATGAAGTGTG
841 GCTACCTACA ACCAACTGAT TTTCAAAAAG TCAACAAAAA TATGAAGTGG AAAAAGGACA
901 CTCTATTCAG TAAATGGTAC TGAAACAATT AAATAGCCAT ATGCAGAAAA ATGAAACTGG
961 ACCCCTATCC TTTACCATAT ATAAAATTAA CTCAAGATTA ATAAAGACTT ATATGCAAGA
1021 CCTGAAACTA TAAAAATCTT ATAGGAAAAA CTCTTCCAGA CTCTGGCATA AGCAAAGATT
1081 TTATGACCAA GACCTCAAAA GCAAATGCAA CAAAAAGAAA AATAGACAAA TGGGACTTAA
1141 TTAAAGAGCT TCTGCACAGC AAGAAAAAAT AATAATAATA ATAAACAGAG TAAACAAACA
1201 ACTTACAAAA TGGGAAAAAA TATTTGCAAA CTATGTGTCT GACACAGAAC TAACATCCGG
1261 AATCCAGAAG CAACTCAAAA CAACTCAAGA AGAAAAAAC AATCCCATTT AGAAGTGGAC

```

| Score | Start | End  | Qsize | Identity | Chro | Strand | Start     | End       | Span |
|-------|-------|------|-------|----------|------|--------|-----------|-----------|------|
| 743   | 1     | 743  | 1320  | 100%     | 7    | (+)    | 147718166 | 147718908 | 743  |
| 577   | 742   | 1320 | 1320  | 99.9%    | 5    | (+)    | 88756239  | 88757077  | 579  |

BLA(S)T Output: 7q35(+)(147,718,90{7-8}>::5q14.3(+)(88,756,2{39-40})

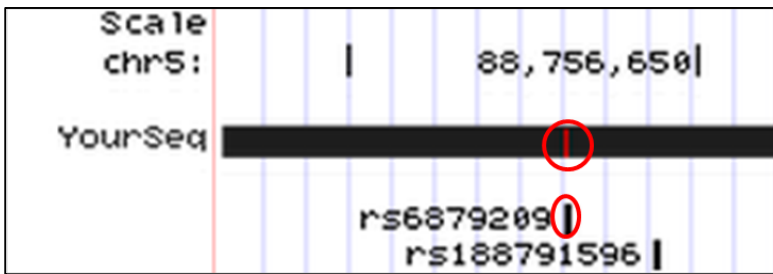

Figure S-DGAP259\_3. BLA(S)T Output, Rearrangement\_E on der(7): Circled mismatch represents a SNP (dbSNP build 141, rs6879209).

### Rearrangement\_F (on der(9))

```

1 AGCCTCATCT CATTATAGCA GATGGCATCA TTCCAAAAGA AAATAAAAAGA AAAAAATTAA
61 ATTGATTACT ATGTCAACCT TGGCATCCAT ATGCCAAATT GTTTTTTGAT AAGAGCTAAG
121 TATTAGGTAG AAACTCGAGA AAAATTATTT TCTCAATTCC AAATTCTTGC TATAAGAATT
181 TCTTAAGTTC ATAGATGCAT ATTTAAACAA TCTGAGTATT TCCAAAATAA CCAGCTTTTA
241 AACTTTCCTT CTAAGGAGAC CAATTTATTC ATCTACTAAG TACCTTGTTT CTTCCCTCAA
301 ATTACTCCAT TTCATCTAAA CTATTTGTCA CATATGTAAG AACAGATATA ATATATAGTC
361 AATTACCAGC AATAGAGCTT TGGGTTTGAG TTTGGGAGGT GTAGAATTTT AGAAAATGTT
421 AGGTTATTAC AGCAGTGAGT CAGCTTGTAG TTTGAATCAG CAAGGATCAT TATCTATCAA
481 AACATCAGTA TGGTTTACCT ACTGCTCTCA TTC {A} CTATTA AGTTTTCTGT TTATTTTTCT
541 GCTGGCTCGC TATGATGTAT CAGAATGTAG GTATTATTAT CTGTTTATAC TGAGAATCAA
601 TGTGTTTTTC AACAATTTTC AAAGGTATCA GCCAGCTATC ATCTAGTTGA ATATGCCTTC
661 TTCCTCCTCT TTATACTATC CTATAAAAAA TAGTAGTCCC TCTCTTATCC ACAGGGCGTA
721 CATTCTAAGA CCCTCAGTGG ATGCCTGAAA CTGCAGATAG TACTGAACCC TACGTACTACT
781 GTGTTTTTTC CTATACATGC ATATCTATAA TAAAGTTTAA AATTAGTTTA TAAATTAGGC
841 ACAGGAAAAG ATGAACAACA ATAATAAGA ATAGAACAAT TATAAAGTA TATTGTAGTA
901 CAATAATGTG GTCTTTCTCT CTCTCAGAAC ACCTTGTTGT ACTATACCAC AGGTTGGCTG
961 AAACATGGA AAGCAAACT GTGGATAAGC TGGGGAGGTG CAGGGGGCTC ATATAGAGTA
1021 TATACTGTTG TGGACATTTA TACTACTGGCC TACATTTTTT ACCCTCTCAT AATTTCCATC
1081 TCTTTGCCCA TCTGTGCTTA ATTCTAAATA ACTTCTTCAG GTCTGAATAA ATTT

```

| Score | Start | End  | Qsize | Identity | Chro | Strand | Start    | End      | Span |
|-------|-------|------|-------|----------|------|--------|----------|----------|------|
| 514   | 1     | 514  | 1134  | 100%     | 18   | (-)    | 54660138 | 54660651 | 514  |
| 621   | 514   | 1134 | 1134  | 100%     | 9    | (+)    | 9646475  | 9647095  | 621  |

BLA(S)T Output: 18q21.31(-)(54,660,13{8}>::9p23(+)(9,646,47{5})

### Rearrangement\_G (on der(18))

```

1 AATGAACTCT TTGAGAGAGC AATCAATGGC CTCATGGCTA TTAGACAGCC ATCTGCACAG
61 GATGAGGACA GGTCTGCCTG TGGTGGGTGG AGAGGATACA GCAGTTAAAA TGTTCTTGTC

```

```

121 CAAGCACCTC TTCACCCACA CAGGAGGCTA CTCCCAGGAG GAACTATGCA TCCCCTTTTT
181 CTGGATAATA AGCATGCTTA TGTAGAGCTA CTTCTTTTCA AATACAGTCT ATTTTTTACA
241 CTGCAGATAA TGGTATGTCA TCATATCACT CCTCTGCTTC ATACTTCCAA AGTTTTTAAC
301 TTTTTTCAGCA AAAAATGCAT TTCTAAAATT TTTAATTGAT GAATAGTAAT TTTGTTTTAT
361 GTATTTGTGG GATATAATGT GATATTTTGA TACATGTTTA CATTGTGTAA TGATTAAATC
421 AAGCTAGTTA ACACAGCCAT CACTTCACAT CCTATCATT TTTTGTGATG AGAATTAATA
481 TCCTCATTGG GTAATTTTGA AATATGTATT ACATTAAGT TAGTCACCAT GCTGTGCCGT
541 AGGTCTCTAA AACTTATTCC TCCCATCTGA AACTTAGTAC GCTGTGAACA ACATCTCCTC
601 ATTTTTGTGT TTCTGCTTCT GGAAATAGGA GATAGAGATT TTAGCTACAG CAATCAGAAT
661 CCACCCTGGA GTGTGCTGTT TTCCTGTGAT AGCAAGAAAA TGTTCCATTT GAAAACCTGCT
721 CCACAAAGAA TCATCAGAAA CCACAGAAAA CAAATGATGG TGTTGGCGGC TT

```

| Score | Start | End | Qsize | Identity | Chro | Strand | Start   | End     | Span |
|-------|-------|-----|-------|----------|------|--------|---------|---------|------|
| 603   | 1     | 603 | 772   | 100%     | 3    | (+)    | 1408382 | 1408984 | 603  |
| 169   | 604   | 772 | 772   | 100%     | 18   | (-)    | 6559443 | 6559611 | 169  |

BLA(S)T Output: 3p26.3(+)(1,408,984)::18p11.31(-)(6,559,611)

### Rearrangement\_H (on der(18))

```

1 ATTGACGACC TCCTGTGCCC CAGACGTTAT TCCAGGTGCT GGAGATACAG TGACAAAGAG
61 CCCTCTCGGA GGGCTCAAGT AAAGGAACTA GGATGAAAAG TGCTGAGTGT CATGCTAAGG
121 GAAGCGCTGG CTGTGGAAGT GTCCCTCACC TAGCCTGGGA TCGGGGTGGT GGTTGCAGGA
181 GGCATCCAAG GAAATGACAT TTACACGGAG GTCTGAGGGG CAGCGAGGTG GTGGGAAGGT
241 GGCTCCAGGT AGGAGGTGAG AAGAGAGCGC ACAAAGTCAG GTTGTAGCAC AGTCTGGCTG
301 GGAAGAGAAG TCGGCTGGTC AGGTGGGGAG CCAGGTCAGG AGGTGCCTCA GAAGCCGTGG
361 CAGCCTGGAC TTTATCCTTA GGGCGGGAGA GCCATGGAGG GGCCATAAAT GGGGGAGAGA
421 GAGCCAAGCC GTAGAGGCAT TTTAGGTCCA CATATGGACA GTAAGTTTGG AAGGTATAAA
481 GACTGGAGTT CCTGTATCGA CTGGGGCAGA TGCAGTGATC TAGGTGGCCG CCAGTGGGAG
541 GCACCTGTGA GTCAGGGTTT GCAGTTCCTG TGTGGACGTC TGAATTAATT CTGCAGATCA
601 GACTGCGTTA CACTGCAAG { A GCAG } AAACAC AAATGAGGTC TGATGGTTGA AAACCTAATG
661 GAAGAAAAAA ATAGAACATT TATGCATAGA AATAAACACA TACACACAAA GGAATACAGG
721 AAAAACTGGG AAATCTGAAT AAGATCAGTG GATTGTATTA GTGTCAATTT CCTGGCTCTG
781 ATATTGTAAT ACAGTTTTTAC AAGATGTTAT CACTGGGAGA AACTAGGTTA AAAAGTACAT
841 GAGATACCTC TGTATTATTT ATTATAATTG CATGTGAATC TAAAATTATC TCAAAATAAA
901 AAAATAATTT TTAATAAATT TGGAAAAGTA ACAAAGGAA AACTAAATAG TACCTTAAAA
961 ATAAAAAACT ATTTAACATT TGTATTTTGA AAATAATTAG AAGCATATGA AAGAGATTGT
1021 GGCTTTTTTGT TTCATTCTTT TATAAATTAC T

```

| Score | Start | End  | Qsize | Identity | Chro | Strand | Start   | End     | Span |
|-------|-------|------|-------|----------|------|--------|---------|---------|------|
| 624   | 1     | 624  | 1051  | 100%     | 18   | (-)    | 6375048 | 6375671 | 624  |
| 432   | 620   | 1051 | 1051  | 100%     | 18   | (+)    | 6559598 | 6560029 | 432  |

BLA(S)T Output: 18p11.31(-)(6,375,0{52-48})::18p11.31(+)(6,559,{598-602})

### Rearrangement\_I (on der(18))

```

1 GTAATTATTT TGAAAAATGA TGTAATGCAA ACCTAGTCAA ATGAAGGTAT GATGAACCAG
61 ACATTTTCTG GCGCATTGTC TTCCTCAGTC TTGTCCTGTG ACTTCTCTAA GCCAATTCAA
121 TCAATTCCCA AATATTTTAC TGAAGTAGAA GTTCAGGGAT ACGATAGTTA AAAGAACCTA
181 CAGCATGCAT TTGGTAAGTT TCTCATGAAG AGACATGTCC CAGGTCTGGA TAGTTGTTTG
241 TCCTCATTGG GGGCCAGAGG AAACAGGCAG ATTTCTTCA AAGGACTGGT ACTTACTCTG
301 CTAAATGGTT TTTCAACAAT GGAATTAGAA AACAGCAGAA TAACATACCT GTGCTGGGCA
361 AATACACACA CACACACACA CCCACACACA CACACACACA CACACACCCA CACACACACA
421 CACCCCTCCC AAAATGGTCA CCCTACAATT CTATAGACTA ACAACATCCA AGAAAACTTT
481 CCATCAAGAG CAGAGGCAAG ATAACAAATC TACAGACAAA CAAATATTAA GTTTACCACC
541 AACAGACCCT CAAAAACAA ACTTCTAAAT ATGTAATTTA GGCAGAGGGA ATACTATCAC

```

| Score | Start | End | Qsize | Identity | Chro | Strand | Start    | End      | Span |
|-------|-------|-----|-------|----------|------|--------|----------|----------|------|
| 346   | 255   | 600 | 600   | 100%     | 9    | (-)    | 9646126  | 9646471  | 346  |
| 252   | 1     | 254 | 600   | 99.7%    | 18   | (+)    | 54659883 | 54660136 | 254  |

BLA(S)T Output: 18q21.31(+)(54,660,136)::9p23(-)(9,646,471)

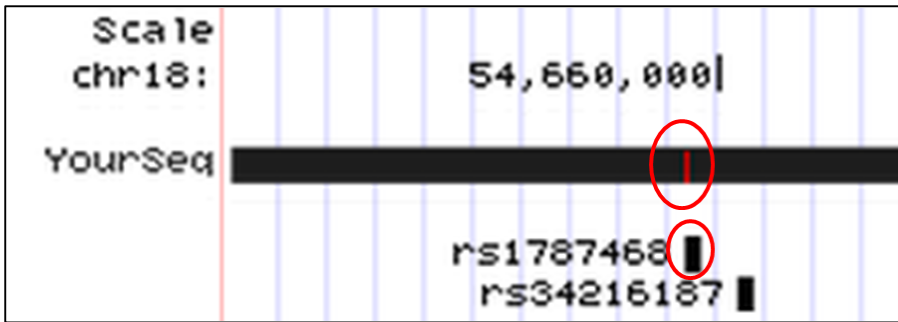

**Figure S-DGAP259\_4. BLA(S)T Output, Rearrangement\_I on der(18):** Circled mismatch represents a SNP (dbSNP build 141, rs1787468).

**Next-Gen Cytogenetic Nomenclature:**

*Short System*

46,XX,t(3;18;5;7)(p25;p11.2;q13.3;q32),t(9;18)(p22;q21)dn.seq[GRCh37/hg19](3,5,7,9,18)cx,der(3)t(3;7)(p24.3;q36.3)dn,der(5)t(5;7)(q14.3;q35)t(3;7)(p24.3;q36.3)t(3;18)(p26.3;p11.31)dn,der(7)t(5;7)dn,der(9)t(9;18)(p23;q21.3)dn,der(18)t(3;18)inv(18)(p11.31q21.3)t(9;18)dn

*Detailed System*

46,XX,t(3;18;5;7)(p25;p11.2;q13.3;q32),t(9;18)(p22;q21)dn.seq[GRCh37/hg19],(3,5,7,18)cx,der(3)(7qter->7q36.3(155,701,797)::3p24.3(17,392,144)->3qter)dn,der(5)(5pter->5q14.3(88,756,2{48-56})::7q35q36.3(147,718,91{1-9}-155,700,873)::AGAAC::3p24.3p26.3(17,392,136-1,408,99{6})::18p11.31(6,375,05{1})->18pter)dn,der(7)(7pter->7q35(147,718,90{7-8})::5q14.3(88,756,2{39-40})->5qter)dn,der(9)(18qter->18q21.31(54,660,13{8})::9p23(9,646,47{5})->9qter)dn,der(18)(3pter->3p26.3(1,408,984)::18p11.31(6,559,611-6,375,0{52-48})::18p11.31q21.31(6,559,{598-602}-54,660,136)::9p23(9,646,471)->9pter)dn

## DGAP268

46,XY,inv(10)(p13q24)dn.arr(1-22)x2,(XY)x1.seq[GRCh37/hg19] inv(10)(p12.2p12.31)(p12.2q23.32)dn

**Prenatal History:** A 28 year-old G4P2TAB1 female had a previous pregnancy termination at 23 weeks due to hydrops fetalis. The father, who is of Iranian Jewish descent and the first-cousin of the mother, had two brothers who were deceased in the neonatal period. At 12 weeks of gestation, fetal ultrasound revealed abnormal nuchal translucency. Amniocentesis was performed at 17 weeks. The ultrasound findings at 15 and 22 weeks were normal. There were no complications during the pregnancy.

**Postnatal History:** Delivery occurred at 33 weeks at an outside facility (the reason for premature delivery is unknown). The newborn medical examination was normal. At 1 year of age, the baby was reported to be healthy and meeting all developmental milestones.

**Sequencing Results and Interpretation of Convergent Genomic Evidence:** Sequencing of the prenatal DNA sample identified the inversion breakpoints in non-genic regions at 10p12.31 and 10p12.2, and disruption of *CPEB3* at 10q23.32. An analysis of the protein-coding genes localized in the same TAD as the breakpoints did not reveal any monoallelic or imprinted genes associated with an abnormal phenotype, correlating with the normal clinical phenotype of DGAP268 (Figure 4A, Table 6).

### BLA(S)T Outputs of Sequencing Results:

#### Rearrangement\_A (at proximal breakpoints of the pericentric inv(10))

BLA(S)T Output: 10q23.32(-)(93,983,897~)::10p12.2(+)(23,659,495~)

#### Rearrangement\_B (at distal breakpoints of the pericentric inv(10))

|      |            |            |             |            |             |            |
|------|------------|------------|-------------|------------|-------------|------------|
| 1    | GATGCCCTC  | TGCTCCAGAA | ATCACCAACT  | CCTACTACTT | TCCCCAGCTC  | TATTTTCCAC |
| 61   | TCCTTTCATT | AGGTTACAAT | AGTAGGAACA  | GACCTTAGGT | CATAACACCA  | CCAAATAAGT |
| 121  | GAATGCAGAG | TAGAAATGTT | CCCCTAAAGA  | GAGGAGGTCA | TTTGAACAAA  | CAGCAATACC |
| 181  | TGTCAAGTTA | ATATTTCTGA | GTTATAACTC  | CTGTACCAGA | AATGTAACAA  | CATCTCACTC |
| 241  | TTGAATCAAA | ACTTTCAGGC | CAGGTGTGGT  | GACTTGTGCC | TGTAATCCCA  | GCATTTTGGG |
| 301  | AGGCCATGGC | AGGTGGATCA | CTTGAGGTCA  | GGAGTTCGAG | ACCACCCTGG  | ACAATATGAT |
| 361  | GAAACCCCAT | CTGTACTAAA | AATACAAAAA  | ATAGCTGGGC | ATGGTGGCAG  | GTGCCTGTAA |
| 421  | TCCCAGCTAC | TCGGGAGGCT | GAGACAGGAG  | AATCTCTTGA | GCCCCGAGAGG | CAAAGCCTGC |
| 481  | AGTGAGACGA | GATCACGCCA | GTGCACTCCA  | GCCTGGACAA | CAGAGCAAGA  | CTCCATCTCA |
| 541  | AAAAAATAAA | AACTCTCAAA | TTCATTTTATT | TATTCAAATA | TATAATAAGC  | ATCTACTACA |
| 601  | GCTGAAGCTT | TGCTGCTGTG | GTCTGAATGT  | GGTATACCCC | CAAAATGCAC  | ATGTTGAAAT |
| 661  | TTACTCCCCA | TTGTGATAGT | ATTAAGAGGT  | GGGGCCTTCG | AGGAAGTAAT  | TAAGTCATGG |
| 721  | AGGCTCTGCC | CTCATTAATG | GGGTTAGAGC  | TTTTATAAGA | AAGAGAGGCT  | TGTAGTCCCA |
| 781  | GCTACACAGA | AGGCTGAGGC | AGGAGGATAG  | CTTGAGCCCA | GGAGTTC AAG | TCCAGAATGG |
| 841  | GCAGTACAAT | GAGACCCCAT | CTCTTAAAAG  | AGGGAGAGAG | AGAGAGAGAC  | ATTGATTGAA |
| 901  | GGGTGTGTGT | TTGCCCCCTC | TGCCATGTGA  | GGACACAGAA | AGAGGCACCA  | TTCATGAAGC |
| 961  | AGAGAACGAG | CCTTTACCAG | ACAATGAATC  | AGCTAGTGCC | TTTATCTTGG  | ACTTTCTAGC |
| 1021 | CTCTATAAAT | GTGAGAAGTA | TTAAAATTTT  | TATTATTTAT | AAATTACCCC  | ATCGAAGACG |
| 1081 | TTCACTTACC | TGACTTTCCA | GATTAATCTC  | TGTGTTTTAT | CTTCCCTATA  | AAAAATATCC |
| 1141 | ACAGCACATT | CAACAGCCGT | GACCAATAAG  | ACCATAAATT | TCTGTCCAAC  | AGATGAATTG |
| 1201 | CAAGCTTACC | TAGAGATGGT | AAAGGTTTGT  | CTCCAAACCT | CTTTTTTTTT  | TTTTTTAATT |
| 1261 | TTTCATAGAG | ATGGGATCTT | CTTATGTTGC  | CCAGGCTGGT | CTCGAACTAC  | CGAGTTCAAG |
| 1321 | CAATCCACCC | ACCTCAGCCT | CCC AAGTGC  | TGGGATTACA | GGTATGAGCC  | ACTGCACTCA |
| 1381 | GTTCTAAACC | TTTTTAATGT | CAGTATTATT  | GTAATTATGT | GACTTAAATA  | TATGCAAACC |
| 1441 | AATGAAATGA | ATGCCAAAAA | ATTATTTGAT  | GAAAAGCAAT | TTGAATTTGC  | TAGATTTGAA |
| 1501 | TTTAGAAAAA | GCTAGATACA | ACAGCAATCA  | GGTTTCATTT | ATTCAAACG   | TTATCAAAGT |
| 1561 | TCAGCAGGAA | TTCTCTCAGC | TCTGAAGAGG  | GAAAAAGAGA | AATTTTAAGA  | GATGTCTATG |
| 1621 | TTTTAAAATC | TTAAAACTTT | GCATTGGGTG  | CCATGTTGTT | GGGTGCCATG  | TAGCAGTGCT |
| 1681 | TTTACTCTGT | ATCTGTAAGC | TCCCAGATGC  | ACTGTAGCAC | CCCAGGCTAG  | AGTGCAATGG |



```

1741  TCGGATCTTG  GCTCACTGCA  ACCTCTGCCT  CCCAGGTTCA  AGCGATTCTC  CTGCCTCAGC
1801  CTCCAGAGTA  GCTGGGATTC  CAGACACCCA  CCACCACGTC  CAGCTAGTTT  TTGTATTTAT
1861  AATAGAGATG  GGGTTTCACC  ATTTGGGCCA  GGCTGGTCTC  AAACTCGTGA  CCTCAGATGA
1921  TCCACCCACC  TCCACCTCCC  AAAGTCCTGG  GATTACAGGC  ATGAGCCACC  ACTCCCAGCC
1981  CAACCAGGAG  CTTTTTAAAA  GTAGATCCAC  TGTGTCTTGG  CCCAAATCCA  CCAGCTGCCT
2041  CAGAGTCTCA  CAGGCTAGGC  CTGTGTTTTT  AAGAATGCTG  TGAGTGATTC  TGACATACAA
2101  CCCAGCTTAG  GAATAACAGC  CCCACTAGGC  TGGCTGACTC  ACCTTCCCTC  TCATCTTTCT
2161  AGGACTCTGT  TTTCCCCATT  GCGGGGGATT  TCGGCTCATC  AAGTTACACC  AATTGACTCT
2221  CAGCATCACT  GAGCTTTTTT  TTTACATCC  AGGGTGAGTT  TAAGTCAGTG  CTTCTCTGGG
2281  TCTCACAGGA  GTGGACATTC  TAAAGCCAGC  ATCTCCTCTG  AGTAACTCAC  TCCCCGATGA
2341  TGGGAGTTTG  ACTTTTCCTT  GGTTATGAGT  TACAGGATGA  AAGTCAGGTG  CAAACACTTA
2401  TTTCTTCAAG  CCAACAAATC  CTAGCACCTC  CTCGATCTCA  GAGAAGGTCA  GCAGACATGT
2461  GTGTGCCACG  TTTCTTCATC  TCAAGACCTG  TGTATCATAG  TGGGAAACTG  GACTTGCAAA
2521  TGGCATGCA  GGAAGAGAAG  GCTGTGTGAG  TGTGCGCCCC  TGGGTAGAGG  CTGTCTTTGT
2581  TGA AACCGTG  GTGCCCGAC  AAAAGCCGGA  AAGCGAATCT  CCTTCTACTG  CACCTGCAGG
2641  CTCTGGGCC  AAGCATGTT  CGGGCGAGAG  GATATTTAGG  GATTTCTGGG  TTTAGCTTTC
2701  TCCGTTTTGC  CGTTCAGTTC  ACTCTGGCCC  TGGCTGTCTC  CAAAGGAGAG  GACTGATACC
2761  ATGGGATTAA  GTCCTTATGT  TCAAGCTCCG  GTCTGGGAAG  CTGAGTCTCC  ATCTTTTTCT
2821  GAGGCCAAGG  CATTGTTCTG  ACAACTGCCC  TTGACTCCAG  TTCCTTCAGG  ATGAGGGCCG
2881  TGGCTTTTCT  TGCCCACTCT  TCTGCTCCTG  AATCCTTCTT  CGCAGCCTCT  AACCACACTG
2941  CTAGCCCTCA  TCTCTGGCTT  GCTGCCAATT  TCCTCTGGCA  CTATCCTCCC  TAGCTGGCTG
3001  CAAACCCACC  TGTTGTTTTT  TGGGTTTTTT  AGAGATGGGG  TCTCGCTCTG  TTGCAATCAT
3061  AGCTCACTGC  AGCATCGAAC  TCTTGGGCTC  GACAATCCTC  CCACCTCAAC  CTCCTAAATA
3121  GCTGAGACTA  TAGGTGCCCA  CCACCACATC  TGGCTTATTT  TTTTATTTTT  TTGTAAGAGA
3181  TGGAGTCTCA  CTAGATTACC  CAGGCTGCTC  TCAAACCTCT  GGCCTCAAGG  GATCCTCCCA
3241  CTTCTGCCTC  CCAAAGTGCT  GGGATTACAG  GCATGAGCCC  CAGTGCCCGA  TCGCCACTTG
3301  TTTTCTCTTG  CTTACTC

```

| Score | Start | End  | Qsize | Identity | Chro | Strand | Start    | End      | Span |
|-------|-------|------|-------|----------|------|--------|----------|----------|------|
| 1598  | 1720  | 3317 | 3317  | 100%     | 10   | (+)    | 21606655 | 21608252 | 1598 |
| 1698  | 1     | 1698 | 3317  | 100%     | 10   | (+)    | 93980711 | 93982408 | 1698 |

BLA(S)T Output: 10q23.32(+)(93,982,408)::GCTCCAGATGCACTGTAGCA::10p12.31(+)(21,606,655)

### Rearrangement\_C (breakpoints of paracentric inv(10))

```

1  CATGGTTTGA  TTTGAGAAGG  AAATTGTCAA  GACTTCTCT  CTCTCAGGCT  GGGTTTGGTT
61  ACTGGAACAT  TTAGGACACT  TTGAGCAGCA  GGTAAGTAA  CACCAAAATT  AAACAATGCA
121  TAAATGCATT  AGATTGTGAG  CCTGCGAGTT  TAGAGATAAG  AACTATGTT  CTCTGGGAGG
181  TTGGCTCAAT  TCAGTGGTTT  TAACCTCCAC  TTCCTCCAAC  TCTCTGGACT  CATCCTCAAG
241  GCCTAGAGCA  AGATGTCTGC  AGCCATTTCA  GGCCTCAGTT  ATACCAATGT  CCAGAGGGAG
301  AGAGGGTTTC  CCCTCCAAAA  TTTCTCTCAA  GAGTGTAGGG  GAAGGGCCAG  GCTCGGTGGC
361  TCATGCCTGT  AATCCAGAAA  CTTTGGGAGG  CCGAGGCAGG  CGGATCACCT  GAGGTTGGGA
421  GTTCAAGACC  AGCCTGACCA  ACATGGAGAA  ACCCCCTCTC  TGCTAAAAAT  AAAAAAAAAA
481  AAAAAAATAG  CCGGGAGTGG  TGGTGCATGC  GTGTAATCCC  AGCTACTTGG  GAGGCTGAGG
541  TAGGAGAATC  GCTTGAACCC  GGGAGGAGGA  GGTTGCAGTG  AGCCGAGATC  GCGCCATTGT
601  ACTCCAGCCT  GGGCAACAAG  AGCGAAACTC  CATCTAAAC  AAAAGAATGT  AGGGGAAAAA
661  ACCAATACCC  TTTCTCATC  CATCACAAGG  GTCATGGCAG  ATACTCCTAT  AACAAGAGAC
721  AGAGTAACAA  GAGAAAAGCA  TCACAAATTT  ATTTAACCAA  GGTTTACGTG  ACAGGGGAGC
781  CTTCCAAAGT  GAAGACCTGA  AGACCCAGGG  AAGACTGTGC  TTTTGTGCTG  AGTCTGATGG
841  AAGAAGTGAA  {CAG}AAAAAA  AAAAAAAAAA  AAAGGCCGGG  CGCAGTGACT  CACGACTGTA
901  ATTCCAGCAG  TTTGGGAGGC  TGAGGCGGGT  GGATCACCTG  AGGTCAGGAG  TTCAAGACCA
961  GCCTGGCCAA  CATGGTGAAA  CCCTGTCTCT  AATAAAAATA  TAAAAAATTT  AGCCGGGTGT
1021  GGTGGTGGGC  GCCTGTAATC  GCAGCTACTC  AGGAGGCTGA  GGCAGAATTG  CTTGAACCCA
1081  GGAGATGGAG  GTTGCAGTGT  GCCGACATGG  TCCCCTGGA  CTCCAGCCTG  GGCGACAGAG
1141  TGAGATTCCA  TCTCAAAAAA  AAAAAAAGAA  AAAGCCCCTC  GTTGAACAACA  GTGTGGAGAT
1201  TATAAAAATA  GAACCACCAT  AACTTCAGC  AACCTTGCTA  CTGGGTATCT  ACCCCCGCAA
1261  AAAAAAAT  CATTTTATAT  ATAAAAAAT  ACCTGTGCTC  ATATGTTTAT  TGCACACTA
1321  TTCACAAATG  CAGATCATG  GAATCAACCT  AAGTGACCAT  CAACGGAGGG  CTGGCTAAAG
1381  AAAATGCACT  CTAAATACAC  AACAGAGGCC  GGGCGCCTGA  AAATGCACTC  TAAATACACA
1441  ACAGTGGCTC  ACGCCTGTAA  CCCAGCACTT  TGGGAGGCCG  AGGCGGATGG  ATCACGAGGT
1501  CAGGAGATCA  AGACCATCCT  GGTAAACACG  GTGAAACCCC  GTCTCTACTA  AAAATACAAA

```

1561 AAAAATTAGC CGGGCGTGTT GGTGGGCACC TGTAGTCCCA GCTACTTGGG AGGCTGAGGC  
 1621 AGGACAATGG CGTGAACCCG GGAGGCGGAG CTTGCAGTGA GCCAAGATCG CGCCACTGCA  
 1681 CTCCAGGCTG GGCGACAGAG CGGACTCCG TCTCAAAAAA AAAAAAAAAA AATACACAAC  
 1741 AGAATACTAT TCAGGCATAA AAAAGAAACA ATGTCTTTTG CAGCAACATG GATGGAAGTG  
 1801 GAGTCCATTA TCTTAAGTGA AAGAACTCAG AAACAGAAAG ACATTGCATG TTCTCACTTA  
 1861 TAAGTGGGAG TTGAATAATA TGGACCCAGG GACATAGAAT GCAAATAAT AGACGCTGGA  
 1921 GACTTGGAGG TGTAAGCGGG TGGGAGGGAT GGGAGGTTGC TTGGTGGATA TAAAG

| Score | Start | End  | Qsize | Identity | Chro | Strand | Start    | End      | Span |
|-------|-------|------|-------|----------|------|--------|----------|----------|------|
| 1125  | 851   | 1975 | 1975  | 100%     | 10   | (-)    | 21605510 | 21606634 | 1125 |
| 853   | 1     | 853  | 1975  | 100%     | 10   | (+)    | 23658350 | 23659202 | 853  |

BLA(S)T Output: 10p12.2(+)(23,659,20{0-2})::10p12.31(-)(21,606,63{4-2})

### Next-Gen Cytogenetic Nomenclature:

#### Short System

46,XY,inv(10)(p13q24)dn.seq[GRCh37/hg19] inv(10)(p12.2p12.31)(p12.2q23.32)dn

#### Detailed System

46,XY,inv(10)(p13q24)dn.seq[GRCh37/hg19] inv(10)(qter->q23.32(93,983,897~)::p12.2q23.32(23,659,495~-93,982,408)::GCTCCCAGATGCACTGTAGCA::p12.31p12.2(21,606,655-23,659,20{0-2})::p12.31(21,606,63{4-2})->pter)dn

## DGAP285

46,Y,inv(X)(p11.2q28).arr(1-22)x2,(XY)x1.seq[GRCh37/hg19] inv(X)(p11.21q28)

**Prenatal History:** A 22 year-old G1P0 female had a spontaneous conception and uncomplicated pregnancy until comprehensive ultrasound screening at 22.5 weeks, which revealed hydrocephalus, hypoplastic and irregularly shaped cerebellum, unilateral left multi-cystic kidney, and single umbilical artery. Amniocentesis was performed on the same day at 22.5 weeks. Fetal echocardiography at 23.1 weeks was reported to be normal. Follow-up fetal ultrasounds at 23.1 and 28 weeks continued to be significant for the previously reported abnormal findings. At 31.4 weeks the mother presented at an outside hospital for decreased fetal movements and intrauterine fetal demise was detected. The parents declined any post-mortem studies.

**Sequencing Results and Interpretation of Convergent Genomic Evidence:** Sequencing of the prenatal DNA sample identified the inversion breakpoints within *FAM104B* at Xp11.21 and within a non-genic region at Xq28. The breakpoints at Xq28 disrupt a TBR, which may result in genomic rewiring of the surrounding TADs and TBRs. *MTM1*, a hemizygous gene associated with X-linked centronuclear myopathy (a prenatal onset fatal disease with clinical findings including decreased fetal movements and hydrocephalus),<sup>19; 20</sup> is located in a TBR upstream to the Xq28 breakpoints, and therefore dysregulation of *MTM1* might be contributory to the phenotype of DGAP285 (Figure 4B, Table 6).

### Next-Gen Cytogenetic Nomenclature:

#### Short System

46,Y,inv(X)(p11.2q28).seq[GRCh37/hg19] inv(X)(p11.21q28)

#### Detailed System

46,Y,inv(X)(p11.2q28).seq[GRCh37/hg19] inv(X)(qter->q28(150,286,207~)::p11.21q28(55,174,723~-150,284,569~)::p11.21(55,174,381~)->pter)

## DGAP288

46,XX,t(6;17)(q13;q21)dn.arr(1-22,X) x2.seq[GRCh37/hg19] t(6;17)(q21;q24.3)dn

**Prenatal History:** A 37 year-old G3P2 female had an abnormal fetal ultrasound with a cystic hygroma identified at 11.1 weeks. CVS was performed at 11.6 weeks. At 28 weeks polyhydramnios and micrognathia were detected on ultrasound examination. At 34 weeks, fetal MRI revealed findings suggesting Pierre Robin sequence including a small jaw index consistent with micrognathia and retrognathia, glossoptosis, and suspicion for cleft palate without cleft lip.

**Postnatal History:** C-section was performed at 39 weeks and continuous positive airway pressure was applied after birth. Physical examination finding of cleft palate was consistent with Pierre Robin sequence, and additional findings included small low-set ears, a flat nasal bridge, hypotelorism, a short wide neck, and a large space between the 1st-2nd phalanges. The newborn received nasogastric feeding due to the cleft palate.

**Sequencing Results and Interpretation of Convergent Genomic Evidence:** Sequencing of the prenatal DNA sample identified the translocation breakpoints within non-genic regions at 6q21 and 17q24.3. An analysis of the protein-coding genes localized in the same TAD as the breakpoints revealed that the 17q24.3 breakpoints are within the same 1.88 Mb TAD as SOX9 and within its well known upstream cis-regulatory region for Pierre Robin sequence.<sup>21-23</sup> DGAP288 had decreased SOX9 RNA expression and an overlapping phenotype of Pierre Robin sequence (Figure 4C, 5, Table 6).

### Rearrangement\_A (on der(6))

|     |            |            |            |             |              |             |
|-----|------------|------------|------------|-------------|--------------|-------------|
| 1   | ATAACAGAAG | CATTCTTTAG | TCACCCTAAT | GATAGACAGT  | GAAGCAATCT   | GGTGAATGGT  |
| 61  | TAGGATGTTA | GTGGGATGGG | AGGATTTGAA | AAGGAGCAGA  | TATAGTTGAG   | TATTGGAAAG  |
| 121 | CAAGAATTCT | GTTTGGTACA | TTTTAAGTTG | AGAAGTCAAT  | TTTATGGACG   | TCCAAGGAGA  |
| 181 | GATATTGCTT | AGGTAGTTAA | ATGATTGAGT | CAAACATTCA  | TGGGAAAGGT   | GAGAGCTAAA  |
| 241 | AACATAAACT | AGGGAGTTAT | TAGCTTATAA | AGTTAACCTT  | TAAAGCCATG   | GGATTCAACG  |
| 301 | TTTCCACCTA | GAACATATGT | GTTGTTAGAG | AAAAGTGTGA  | GGCTTGAGCC   | CTAGAGCATG  |
| 361 | ACAATACGTA | GACATCAGGA | AGACGAGAAG | GATCCAGGAA  | AGGATATAGG   | AAGGAGTAGC  |
| 421 | CAGTGAAATA | GAAGGTAAGC | AAATGAACAA | AAATGTCCTG  | GAAGAAAAGT   | GAAAAAAGGT  |
| 481 | TTCAAGGAGG | AGAAAGTGAT | CCACTGTGTC | CAGTGAATTT  | GATGAATTAA   | ATGAGGCAAG  |
| 541 | AAATGAGAAT | TGATCATTGG | ATTGTTAACC | AGAGGTCACT  | GGTGACTGAT   | AAATTTTCAGT |
| 601 | GGAGTGATCA | AGGTGAAAGC | AAGATTGGAG | AGTGTTCAACA | AGATAATGAG   | ACAGGAAGAA  |
| 661 | CTGGAGACAG | AAATAACTCT | TTCGAAGAGT | TTTCATCTAA  | {AGG}ATTTGCC | TTCAGCCATT  |
| 721 | TCTCAGTTAG | GAAAAATACA | GATTCTGGGG | GAAAGTTATT  | CACAGAGAAA   | GTAAAAATTG  |
| 781 | CCAGTGGGTC | TTTTTTTTTT | TTTCTTCCAG | AAATAAAAGG  | AT           |             |

| Score | Start | End | Qsize | Identity | Chro | Strand | Start     | End       | Span |
|-------|-------|-----|-------|----------|------|--------|-----------|-----------|------|
| 703   | 1     | 703 | 822   | 100%     | 6    | (+)    | 112975342 | 112976044 | 703  |
| 116   | 701   | 822 | 822   | 95.9%    | 17   | (+)    | 69728017  | 69728137  | 121  |

BLA(S)T Output: 6q21(+)(112,976,04{2-4})::17q24.3(+)(69,728,01{7-9})

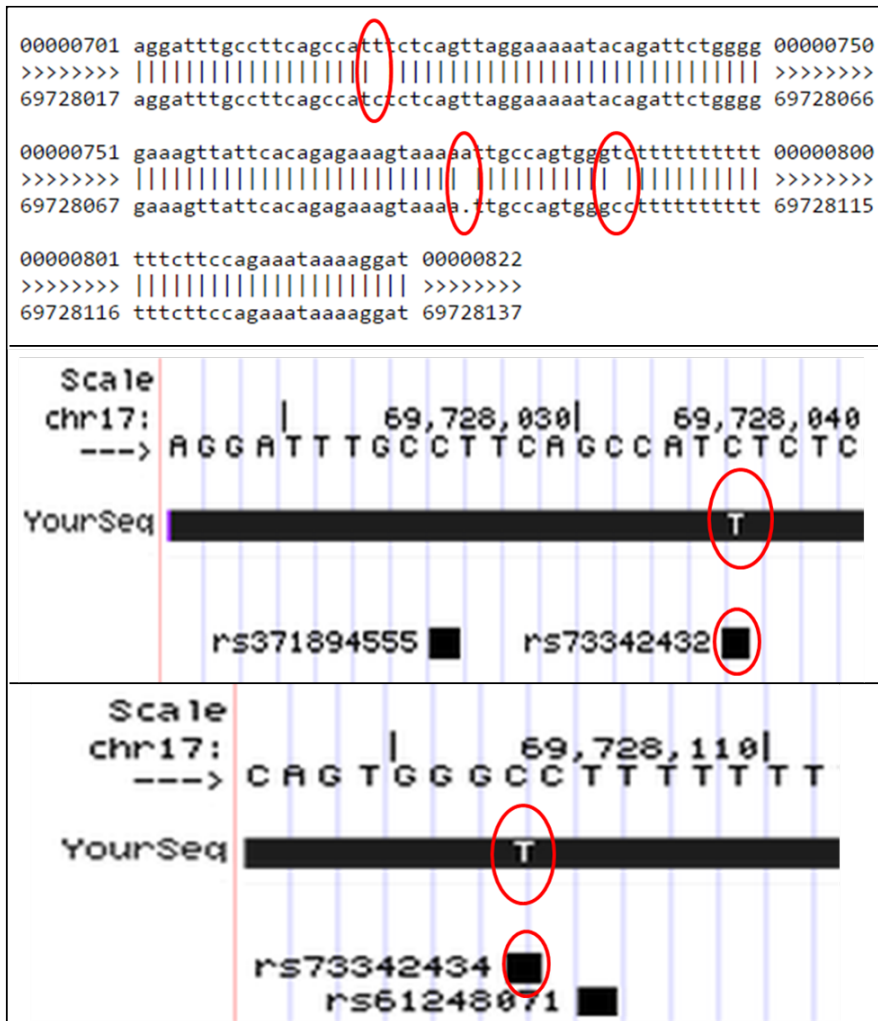

**Figure S-DGAP288\_1. BLA(S)T Output, Rearrangement\_A on der(6):** Circled mismatches represent a SNP (dbSNP build 141, rs73342432), an additional repetitive nucleotide “A”, and another SNP (dbSNP build 141, rs73342434); respectively.

**Rearrangement\_B (on der(17))**

|     |            |            |            |             |            |                    |
|-----|------------|------------|------------|-------------|------------|--------------------|
| 1   | CTGGGTATTT | ACAGAAAAG  | ATGTTGAGCC | TTCTTCTAGG  | CAGAGACAAC | TCTTCTAGAA         |
| 61  | AATATCTCAT | ACAATAAAGA | TTGATTATCA | CATTGTTTATG | TGTGTAATTC | ATGTGTTCTC         |
| 121 | AAAATTTTCC | TTAGAGGTAT | AGCAGTTACA | GACATACCCC  | AAATACATAA | ATCTGTGCTT         |
| 181 | GTACTAAGAG | AAACTTGGTG | TCAATTATTC | ACTTTCCAAA  | AGGATTCACT | AGATGTCATC         |
| 241 | CTCAGTGATT | TTCCTTAGAG | CGTTTCAGGT | GGGATTTGAG  | TTATCAAAC  | TGGTTTCATT         |
| 301 | TGTGCTTTCG | TGAATATACC | TATTTGGTAA | GATCTGTTTT  | GCCAAATTCA | GTCCAATACA         |
| 361 | AATTGGTCTT | GAATCCTATT | CAAGGGAGAT | TATGTTTAAA  | GGACCTGAGG | GACTTCATTA         |
| 421 | TAACCACAGC | TTCTTCTACC | CCGGATGCC  | CATGGCCTAA  | GACTCCCAAG | AGCAGCAGCT         |
| 481 | TTCCAGCCAT | GTCCTGAGTT | TCTGGGGCAG | AGTAAAGCCC  | TTTATTTTCA | TC <b>TAAAGGGC</b> |
| 541 | TTTAGGGAAA | TAGCTGGTAG | CTGGAAGGAA | ACATGAGATT  | AAGAGAGGGT | TTATTTTCATT        |
| 601 | GTTTCAAAG  | TTGAGATTTA | ATGTACATAT | TATGAAATGC  | ACAGATCTTA | CATGTACTTA         |
| 661 | GTTCTGATAA | ATGACATAC  | CATGTGGCAT | GCACACTCTT  | ATGAAGATAT | AGACATTTT          |
| 721 | TCTCAGTCCA | GAACATTCCC | TTTTAGCCAT | TCTAGTCAAT  | ACATATATCA | TCCTACTTTC         |
| 781 | CCTTATCTAC | TCCATATGAA | GCAACTATTG | TTCTGATTTT  | TCTCAACATA | GAACATTCTT         |
| 841 | GCCTAGTCCA | AGAGTTCGTA | TCAATGGAAT | CACAGGGTGT  | GTC        |                    |

| Score | Start | End | Qsize | Identity | Chro | Strand | Start     | End       | Span |
|-------|-------|-----|-------|----------|------|--------|-----------|-----------|------|
| 517   | 1     | 517 | 883   | 100%     | 17   | (+)    | 69727490  | 69728006  | 517  |
| 357   | 525   | 883 | 883   | 99.8%    | 6    | (+)    | 112976031 | 112976389 | 359  |

BLA(S)T Output: 17q24.3(+)(69,728,006)::CCCTTTA::6q21(+)(112,976,031)

or

BLA(S)T Output: 17q24.3(+)(69,728,006)::6q21(112,976,045-112,976,039)::6q21(+)(112,976,031)

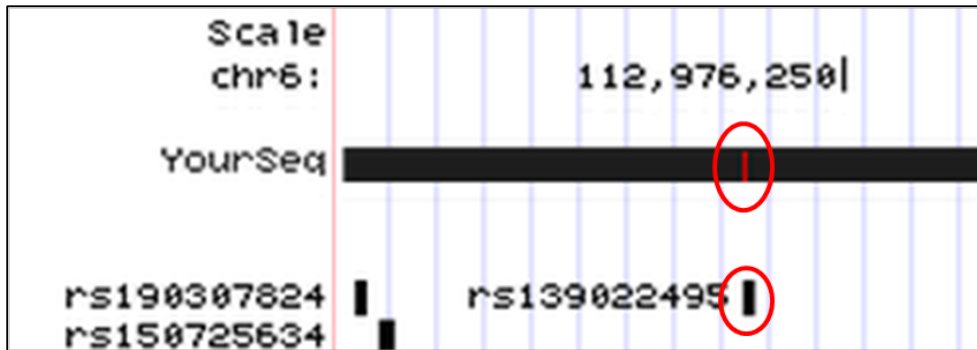

**Figure S-DGAP288\_2. BLA(S)T Output, Rearrangement\_B on der(17):** Circled mismatch represents a SNP (dbSNP build 141, rs139022495).

### Next-Gen Cytogenetic Nomenclature:

#### Short System

46,XX,t(6;17)(q13;q21)dn.seq[GRCh37/hg19] t(6;17)(q21;q24.3)dn

#### Detailed System

46,XX,t(6;17)(q13;q21)dn.seq[GRCh37/hg19] t(6;17)(6pter->6q21(112,976,04{2-4})::17q24.3(69,728,01{7-9})->17qter;17pter->17q24.3(69,728,006)::CCCTTTA::6q21(112,976,031)->6qter)dn

or

46,XX,t(6;17)(q13;q21)dn.seq[GRCh37/hg19] t(6;17)(6pter->6q21(112,976,04{2-4})::17q24.3(69,728,01{7-9})->17qter;17pter->17q24.3(69,728,006)::6q21(112,976,045-112,976,039)::6q21(112,976,031)->6qter)dn

## DGAP290

46,XY,t(2;7)(q33;q32)dn.arr(1-22)x2,(XY)x1.seq[GRCh37/hg19](2,7)cx,der(2)t(2;7)(q32.3;q33)inv(7)(q33q33)dn,der(7)t(2;7)dn

**Prenatal History:** A 38 year-old G2P2 female conceived after IVF had a high-risk pregnancy based on first trimester combined screening results. CVS was performed at 13 weeks 6 days. Ultrasound examinations at 16.4 and 18 weeks were normal. Due to a family history of congenital heart anomalies, fetal echocardiography was performed at 16.4 weeks and was interpreted to be normal. The parents decided to terminate the pregnancy at 23 weeks due to uncertainty of the clinical significance of the balanced rearrangement.

**Sequencing Results and Interpretation of Convergent Genomic Evidence:** Sequencing of the prenatal DNA sample identified the translocation breakpoints disrupting *HECW2* at 2q32.3 and *NUP205* at 7q33, with an additional non-genic disruption at 7q33. An analysis of the protein-coding genes localized in the same TAD as the breakpoints did not reveal any monoallelic or imprinted genes associated with an abnormal phenotype (Figure 4D, Table 6).

### BLA(S)T Outputs of Sequencing Results:

#### Rearrangement\_A (on der(2))

```

1      ATAATACTTC  CTAAACCCAC  AGAATTTAAG  TCTTACAGAA  ATGTATAAAT  GCACAGCATG
61     GATCATCTTT  TTAGCTAATA  TAAATGCAGT  TCATAAGAGG  AAGAAAAAAAA  TTAAAATGCT
121    TTAGAAAGAA  TACTTTGAAA  TCAAGATAGA  CTATCCAGCA  AAATAAATTC  TAAAATCATG
181    CCCAACTAAA  GAAAAAGGAA  ACACGATAAA  AACACGAAAA  CAAAATAAGT  TAAAAAAAAA
241    AAAAAGCCTG  TAAGCTGCTT  AGTATTTTCA  TACTGTTAAA  ACATGTTAGT  TGTCAAAAGT
301    CCAGGAGAGT  TATAGTTGTA  ACAAACACGG  TAAGGACATT  TAATGCAAAA  TCTCTTTATC
361    CTAGGAGTTC  CCAAACCTCGT  GATTTGTCTG  TAGGTTAAAA  ATTCAGGAGT  GGCTTAGCTA
421    AGTGGTCCTG  GCTCGGGTTC  GTTATGAAGT  TGCCACCCTT  TAAATTCCTT  AGAGGGCCTT
481    TTATCTCACC  ATCTGGTTCT  CTAACCTCTT  CACAAAGCAT  ATTATAGTCA  CACCCTCAGG
541    TTCATCTTTA  TACTATATCT  TCCTGAGAGT  ACCCTGAATT  TGATCTTTGT  TCAAAGCCA
601    ATTTTTTTAA  ATTTTAGCAT  TGTTTGCCAT  CCAAAGAGGC  TGCAAACCTT  AAAACCCACC
661    AGGTCTTCAC  TGCTTTATAT  ATTATAATTT  TTCTCTGACT  TGTTTCTCTC  CTCTTGTTAT
721    TTACTA

```

| Score | Start | End | Qsize | Identity | Chro | Strand | Start     | End       | Span |
|-------|-------|-----|-------|----------|------|--------|-----------|-----------|------|
| 369   | 1     | 373 | 726   | 99%      | 2    | (+)    | 197163823 | 197164194 | 372  |
| 351   | 376   | 726 | 726   | 100%     | 7    | (-)    | 135905573 | 135905923 | 351  |

BLA(S)T Output: 2q32.3(+)(197,164,194)::AA::7q33(-)(135,905,923)

```

00000001 ataatacttcctaaacccacagaatttaagtcttacagaaatgtataaat 00000050
>>>>>>> |||  >>>>>>>
197163823 ataatacttcctaaacccacagaatttaagtcttacagaaatgtataaat 197163872

000000051 gcacagcatggatcatcttttagctaataataatgcagttcataagagg 000000100
>>>>>>> | |||  >>>>>>>
197163873 gtacagcatggatcatcttttagctaataataatgcagttcataagagg 197163922

000000101 aagaaaaaaattaaaatgctttagaagaatactttgaaatcaagataga 000000150
>>>>>>> |||  >>>>>>>
197163923 aagaaaaaaattaaaatgctttagaagaatactttgaaatcaagataga 197163972

000000151 ctatccagcaaaaataaattctaaaatcatgcccactaaagaaaaaggaa 000000200
>>>>>>> |||  >>>>>>>
197163973 ctatccagcaaaaataaattctaaaatcatgcccactaaagaaaaaggaa 197164022

000000201 acacgataaaaaacacgaaaacaaaataagttaaaaaaaaaaaaagcctg 000000250
>>>>>>> |||  >>>>>>>
197164023 acacgataaaaaacacgaaaacaaaataagttaaaaaaaaaaaaagcctg 197164071

000000251 taagctgcttagtattttcactactgttaaaacatgtagttgtcaaaagt 000000300
>>>>>>> |||  >>>>>>>
197164072 taagctgcttagtattttcactactgttaaaacatgtagttgtcaaaagt 197164121

000000301 ccaggagagttatagttgtaacaaacacggtaaggacatttaatgcaaaa 000000350
>>>>>>> |||  >>>>>>>
197164122 ccaggagagttatagttgtaacaaacacggtaaggacatttaatgcaaaa 197164171

000000351 tctctttatcctaggagttccca 000000373
>>>>>>> |||  >>>>>>>
197164172 tctctttatcctaggagttccca 197164194

```

**Figure S-DGAP290\_1. BLA(S)T Output, Rearrangement\_A on der(2):** Circled mismatch represents an additional repetitive nucleotide “A”.

**Rearrangement\_B (on der(7))**

```

1      GCCAGGATTT      CTTATTTTCC      CAGTTGCAGT      ATCTACCATT      TTCTAACAAA      GGTAGGCCAT
61     TATTTTCCCG      TATTTATAAG      AACACATTTA      TAATTCCATG      TTAAGTGATT      TTATTTATAC
121    AATATTGGG      GGAATTCGT      TCTCATTCTG      ATACTTTGGC      TTCTTTGTTA      TTTTGGGTTT
181    TTTTGTAAAT      TTCTGCTTAA      AGAAGGCTGA      TATTTTAACT      GCTAGCAAAA      ACTTATTTAA
241    ATATAGCCTA      TCAAGGATGG      AATTTGATTC      TCTTACAACA      AATAAAATTT      AAAGATTGTG
301    TTGAAGGGAT      TAGAAAATTA      ATGGGAATTT      AAAGTTTTTG      AATGAAAATT      GTTTTACAAA
361    GATTTCTGAT      TTTCTCTTCC      CAGGCTGTTT      ATGAGGAAAA      AAAAAATCCT      GGTTTATTTT
421    TGTTTCTTGT      GTTTGTATTG      AAACCAATTC      AGATCTTGAA      ATGAAAAGTT      GAAAACATAA
481    TATGGTAGAA      AACAGTTTTA      ACTTAGTTTA      TTGACATGGC      TAACAATTAT      TCCAGGCTAA
541    TGCAGTCTTA      TCGAGATTCT      ACTTTATTTT      CTTTTTGACC      AACTTTTAAC      AGTTTCTGTA
601    ATTCAGACTA      TATTCAGACA      GTCTTAGTCT      GTTGAGTTTT      TTAAAAGTTT      AGCTTGTGTC
661    ATCTTTATGT      TTTAGGAAGT      TGAGGCTCAC      ACATGCCATA      AACAAATTC      TATTACTAGT
721    AATTGTCAGC      ATCTAATTTA      CCTTTTAGAG      TAATGGCGTT      AGACCTCTGA      GAATTATCTA
781    ATGGCAAAAG      GTTTTTCACT      CTATTTTCAT      AAGTGTCTTA      TTTTGTAGTT      TGGGATTTTG
841    GACAGTTGTA      TCAGAATCAC      TTAAGGGGCC      TAAAACAAAA      CAAAGCAAAA      TAAAAACAGA
901    CTGCTGGGAC      CCACTCCAGA      CCTACTGAAC      CAGAATCTCT      AAGATCTGGG      TACCAAGAAT
961    ATGCATTTTA      TTTTTTAAAG      TC

```

| Score | Start | End | Qsize | Identity | Chro | Strand | Start     | End       | Span |
|-------|-------|-----|-------|----------|------|--------|-----------|-----------|------|
| 838   | 1     | 840 | 982   | 99.9%    | 7    | (+)    | 135298971 | 135299810 | 840  |
| 141   | 842   | 982 | 982   | 100%     | 2    | (+)    | 197164206 | 197164346 | 141  |

BLA(S)T Output: 7q33(+)(135,299,810)::G::2q32.3(+)(197,164,206)



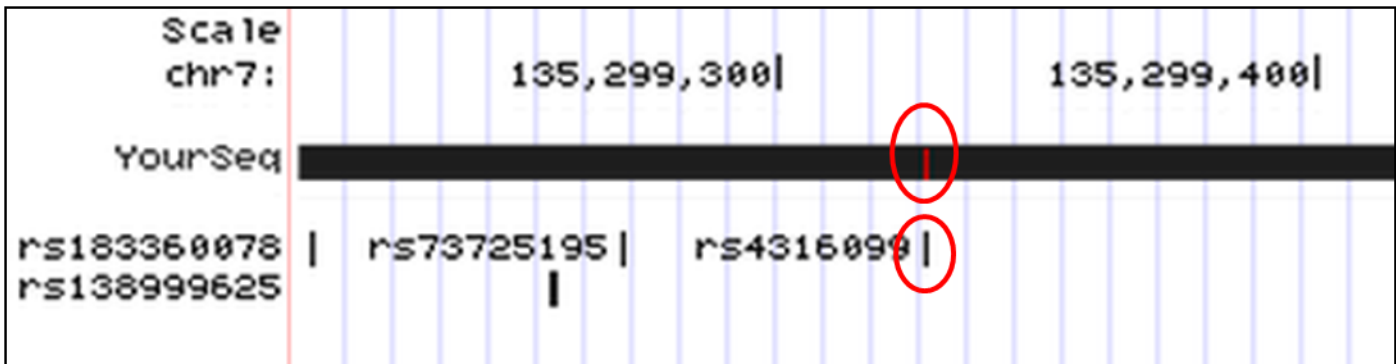

**Figure S-DGAP290\_2. BLA(S)T Output, Rearrangement\_B on der(7):** Circled mismatch represents a SNP (dbSNP build 141, rs4316099).

**Rearrangement\_C (on der(2))**

```

1      CAAAACAAAT  ACATAAGAAA  AATTAAACTT  AAATTGCATG  ATTTTATAAT  ACCTCAATTA
61     ATGATGTGGT  TTAACATTTA  ATTAAGGCTG  AGAATCACTT  ATACAATAGT  TTTTATTTTT
121    ATTTATTTAT  TTTTATTGT  AGAGACAGGG  TCTCACTCTA  TTGCCCAGGC  TGTACTTGAA
181    CTCCTTGCC  CAGTGTTCC  CCTGTCTCAG  CCTACCTAAG  CACTGGGATT  ATAGGCGCGA
241    GCCACTGTGC  CTGGTCCTAC  AATAAGATTT  TTTTAATCCA  ATACTATTTT  AATATGCTTG
301    ACATTGAAAC  CCTAAACTGT  GACAGTATAA  ACATAAAATT  AACCATATAA  CAATACTAAT
361    AATAATTTCA  GGCAAAGCTA  AATGAAGTTT  TATAAACAC  ATACCATAAT  AGGTAAGATG
421    TTAATTTTTA  TTTTAAATTA  GGTGTAAAGA  GGGTTTCTAA  AAGCTTCTTA  {A}GATAATAA
481    TATTTACTGC  TGCTTTAAAC  CATTAAAGTT  TGGTTTAATT  TGCTGTGTAG  CAATAGATAA
541    TAAGTTGCCA  CTGACTTTTA  ATTATTGTAA  AATCAATGAG  GAGATGTCTG  GCCTCATAGA
601    AGATTTACCT  GACATGAATC  AGCCCTCTTC  CTGATTCTAA  CATATAGAAA  TGATGGAAAA
661    ACTACAAAAA  GCTTGAATAA  AATAGTCATG  TAAGGATGAG  AATGGAATCC  CTAGATAATA
721    AAAACATAGA  GAGAAATCAC  AGTCATTTGG  GAAGGGTAAA  GTGAACGTAG  TAACCTGGCC
781    CATTGAGGTT  TATGAGATAT  AGGATTGTGT  AAAGGATGAG  GCTGAAGTTT  TCATGCAGGG
841    TCAGCAGCTG  GAAACAAGTC  CAATTGTATA  AGGCCAAGAG  CCTACAAGGG  TGCCTCTCT
901    TCACAAATAT  AAAGTTTGAC  TTTCCAGCCT  GGAAAAGCAA  CAAAGAACT  TGTTAAACAT
961    TCAAGACTTT  TTCATCCACT  GATTATTCTT  TGTCCCTTTG  TTATGAGAGA  GTTCTTTGAA
1021   AACAAAGCAA  AGCAAGTGCA

```

| Score | Start | End  | Qsize | Identity | Chro | Strand | Start     | End       | Span |
|-------|-------|------|-------|----------|------|--------|-----------|-----------|------|
| 471   | 1     | 471  | 1040  | 100%     | 7    | (-)    | 135299812 | 135300282 | 471  |
| 570   | 471   | 1040 | 1040  | 100%     | 7    | (+)    | 135905924 | 135906493 | 570  |

BLA(S)T Output: 7q33(-)(135,299,81{2}>::7q33(+)(135,905,92{4})

**Next-Gen Cytogenetic Nomenclature:**

*Short System*

46,XY,t(2;7)(q33;q32)dn.seq[GRCh37/hg19](2,7)cx,der(2)t(2;7)(q32.3;q33)inv(7)(q33q33)dn,der(7)t(2;7)dn

*Detailed System*

46,XY,t(2;7)(q33;q32)dn.seq[GRCh37/hg19](2,7)cx,der(2)(2pter->2q32.3(197,164,194)::AA::7q33(135,905,923-135,299,81{2}>::7q33(135,905,92{4})->7qter)dn,der(7)(7pter->7q33(135,299,810)::G::2q32.3(197,164,206)->2qter)dn

## DGAP295

46,XY,t(2;11)(p13.1;p15.5)dn.arr(1-22)x2,(XY)x1.seq[GRCh37/hg19](2,11)cx,der(2)inv(11)(p15.5)inv(11)(p15.5)t(2;11)(p13.3;p15.5)dn,der(11)t(2;11)dn

**Prenatal History:** A 21 year-old G2P1 female had positive first trimester serum screening for trisomies 13 and 18. Of note, the PAPP-A value was very low (0.1 percentile). cfDNA testing failed at both 12 and 14 weeks, due to low fetal fractions. Fetal ultrasonography was normal until 19 weeks, when an anatomical survey revealed severe growth restriction (~3 weeks delayed) and an amniocentesis was performed. Ultrasound examinations at 25 and 29 weeks showed decreased amniotic fluid volume and continued growth restriction. A fetal echocardiogram at 25 weeks was interpreted to be within normal limits. At 29 weeks, the mother was hospitalized after the fetal ultrasound revealed that the fetus continued to have significant intrauterine growth restriction (~10 weeks delayed).

**Postnatal History:** An emergency C-section occurred at 31 weeks, following an ultrasound examination with no observation of fetal movement. The newborn weighed 450 grams with an otherwise normal physical examination and was admitted and followed in the NICU. The newborn was discharged from the hospital after 21 weeks in stable condition.

**Sequencing Results and Interpretation of Convergent Genomic Evidence:** Sequencing of the prenatal DNA sample identified the translocation breakpoints disrupting *GFPT1* at 2p13.3 and multiple non-genic regions at 11p15.5 within a 70 kb distribution. Interestingly, the breakpoints at 11p15.5 are located within the same 600 kb TAD as *IGF2*, a region well known to be associated with Silver-Russell syndrome through imprinted loss of function (epimutation)<sup>24</sup>, overlapping with the phenotype of DGAP295 (Figure 4E, Table 6).

### Next-Gen Cytogenetic Nomenclature:

#### Short System

46,XY,t(2;11)(p13.1;p15.5)dn.arr(1-22)x2,(XY)x1.seq[GRCh37/hg19]  
(2,11)cx,der(2)inv(11)(p15.5)inv(11)(p15.5)t(2;11)(p13.3;p15.5)dn,der(11)t(2;11)dn

#### Detailed System

46,XY,t(2;11)(p13.1;p15.5)dn.arr(1-22)x2,(XY)x1.seq[GRCh37/hg19] (2,11)cx,der(2)(11pter->11p15.5(1,915,057~)::11p1.55(1,936,993~-1,960,727~)::11p15.5(1,936,668~-1,915,843~)::11p15.5(1,961,361~-1,984,895~)::2p13.3(69,588,420~)->2qter)dn,der(11)(2pter->2p13.3(69,588,264)::11p15.5(1,985,019~)->11qter)dn

## Supplementary Figures

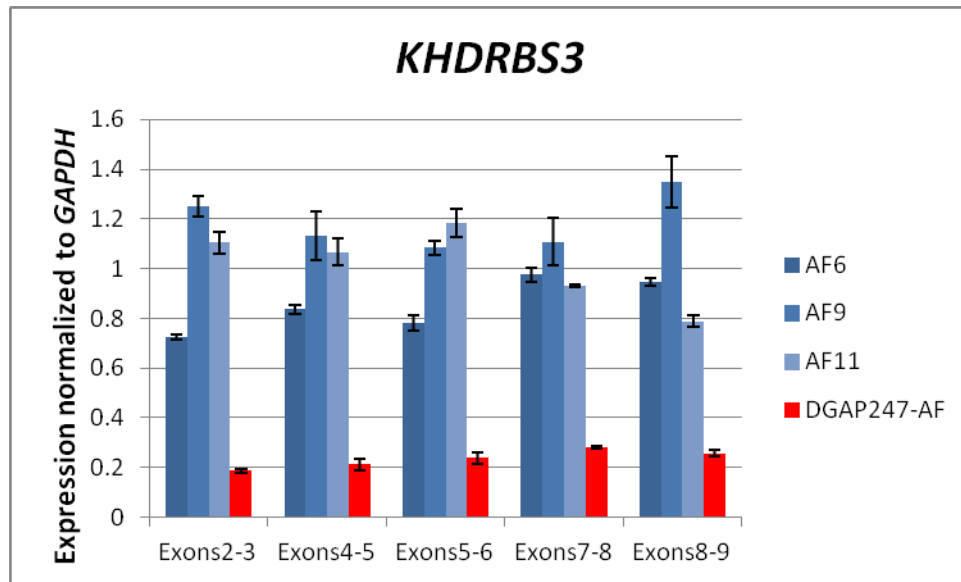

**Figure S1. DGAP247 amniotic fluid *KHDRBS3* expression:** Decreased expression of *KHDRBS3* in the amniotic fluid sample of DGAP247 in comparison to three amniotic fluid control samples (normalized to *GAPDH*).

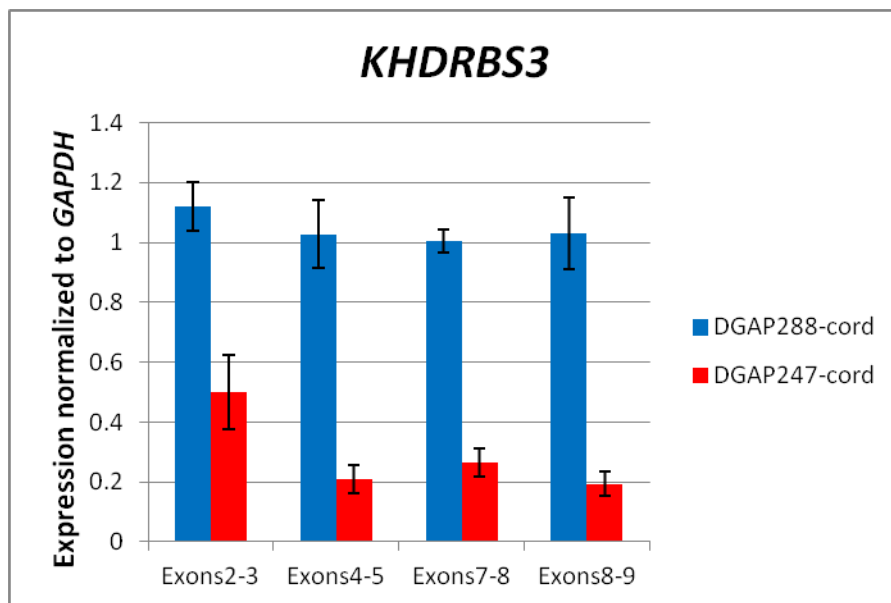

**Figure S2. DGAP247 cord blood *KHDRBS3* expression:** Decreased expression of *KHDRBS3* in the cord blood sample of DGAP247 in comparison to the cord blood sample of DGAP288 (normalized to *GAPDH*).

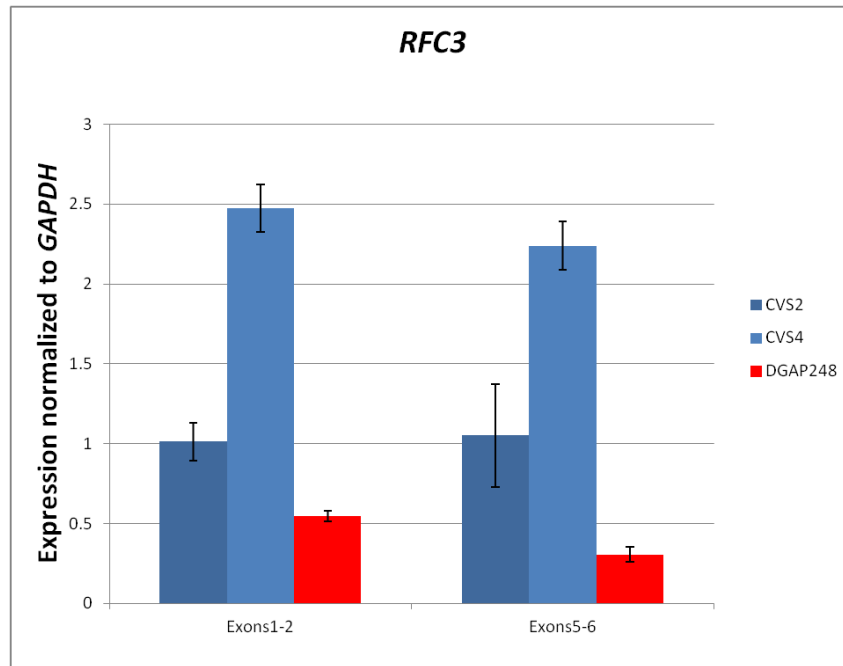

**Figure S3. DGAP248 CVS RFC3 Expression:** Decreased expression of *RFC3* in the CVS of DGAP248 in comparison to two CVS control samples (normalized to *GAPDH*).

**Table S1. Next-Gen Breakpoint Nucleotides of the Analyzed Cases**

| Case    | Next-Gen Band | Next-Gen Breakpoint Nucleotides (GRCh37/hg19)                                                                            |                                                                                                                          |
|---------|---------------|--------------------------------------------------------------------------------------------------------------------------|--------------------------------------------------------------------------------------------------------------------------|
| DGAP239 | 6q13          | Rearrangement_A: 70,405,86{7-8}<br>Rearrangement_B: 70,405,86{7-9}                                                       |                                                                                                                          |
|         | 8q12.2        | Rearrangement_A: 61,628,67{1-2}<br>Rearrangement_B: 61,628,66{7-9}                                                       |                                                                                                                          |
| DGAP247 | 8q11.21       | Rearrangement_A: 51,889,501<br>Rearrangement_B: 51,889,502                                                               |                                                                                                                          |
|         | 8q24.23       | Rearrangement_A: 136,495,820<br>Rearrangement_B: 136,495,823                                                             |                                                                                                                          |
| DGAP248 | 2p12          | Rearrangement_A: 78,301,91{1-2}<br>Rearrangement_B: 78,301,90{8-5}                                                       |                                                                                                                          |
|         | 13q13.2       | Rearrangement_A: 34,542,73{2-1}<br>Rearrangement_B: 34,542,7{20-23}                                                      |                                                                                                                          |
| DGAP258 | 6p25.3        | Rearrangement_A: 776,81{6}<br>Rearrangement_B: 776,787                                                                   |                                                                                                                          |
|         | 6q16.1        | Rearrangement_A: 93,191,54{7}<br>Rearrangement_B: 93,191,545                                                             |                                                                                                                          |
| DGAP259 | 3p26.3        | Rearrangement_D: 1,408,99{6}<br>Rearrangement_G: 1,408,984                                                               |                                                                                                                          |
|         | 3p24.3        | Rearrangement_A: 17,392,144<br>Rearrangement_C: 17,392,136                                                               |                                                                                                                          |
|         | 5q14.3        | Rearrangement_B: 88,756,2{48-56}<br>Rearrangement_E: 88,756,2{39-40}                                                     |                                                                                                                          |
|         | 7q35          | Rearrangement_B: 147,718,91{1-9}<br>Rearrangement_E: 147,718,90{7-8}                                                     |                                                                                                                          |
|         | 7q36.3        | Rearrangement_A: 155,701,797<br>Rearrangement_C: 155,700,873                                                             |                                                                                                                          |
|         | 9p23          | Rearrangement_F: 9,646,47{5}<br>Rearrangement_I: 9,646,471                                                               |                                                                                                                          |
|         | 18p11.31      | Rearrangement_D: 6,375,05{1}<br>Rearrangement_G: 6,559,611<br>Rearrangement_H: 6,375,0{52-48} and 6,559,{598-602}        |                                                                                                                          |
|         | 18q21.3       | Rearrangement_F: 54,660,13{8}<br>Rearrangement_I: 54,660,136                                                             |                                                                                                                          |
| DGAP268 | 10p12.31      | Rearrangement_B: 21,606,655<br>Rearrangement_C: 21,606,63{4-2}                                                           |                                                                                                                          |
|         | 10p12.2       | Rearrangement_A: 23,659,495~<br>Rearrangement_C: 23,659,20{0-2}                                                          |                                                                                                                          |
|         | 10q23.32      | Rearrangement_A: 93,983,897~<br>Rearrangement_B: 93,982,408                                                              |                                                                                                                          |
| DGAP285 | Xp11.21       | Rearrangement_A: 55,174,723~<br>Rearrangement_B: 55,174,381~                                                             |                                                                                                                          |
|         | Xq28          | Rearrangement_A: 150,286,207~<br>Rearrangement_B: 150,284,569~                                                           |                                                                                                                          |
| DGAP288 | 6q21          | Rearrangement_A: 112,976,04{2-4}<br>Rearrangement_B: 112,976,031                                                         |                                                                                                                          |
|         | 17q24.3       | Rearrangement_A: 69,728,01{7-9}<br>Rearrangement_B: 69,728,006                                                           |                                                                                                                          |
| DGAP290 | 2q32.3        | Rearrangement_A: 197,164,194<br>Rearrangement_B: 197,164,206                                                             |                                                                                                                          |
|         | 7q33          | Rearrangement_A: 135,905,923<br>Rearrangement_B: 135,299,810<br>Rearrangement_C: 135,299,81{2} and 135,905,92{4}         |                                                                                                                          |
| DGAP295 | 2p13.3        | Rearrangement_D: 69,588,420~<br>Rearrangement_E: 69,588,264~                                                             |                                                                                                                          |
|         | 11p15.5       | Rearrangement_A: 1,915,057~<br>Rearrangement_D: 1,915,843~<br>Rearrangement_A: 1,936,993~<br>Rearrangement_B: 1,936,668~ | Rearrangement_B: 1,960,727~<br>Rearrangement_C: 1,961,361~<br>Rearrangement_C: 1,984,895~<br>Rearrangement_E: 1,985,019~ |

**Table S2. Analyzed topologically associated domains (TADs) and topological boundary regions (TBRs)**

| Case    | Next-Gen Band | TAD and TBR nucleotides [hESC, GRCh37/hg19] <sup>25</sup> (size)                                                                                                                                                                                                                                                                                     |
|---------|---------------|------------------------------------------------------------------------------------------------------------------------------------------------------------------------------------------------------------------------------------------------------------------------------------------------------------------------------------------------------|
| DGAP239 | 6q13          | TBR: 69,103,279-69,343,279 (240kb)<br>TAD: 69,343,279-70,903,279 (1.56 Mb)<br>TAD: 70,903,279-71,743,279 (840kb)                                                                                                                                                                                                                                     |
|         | 8q12.2        | TAD: 59,557,446-60,917,446 (1.36 Mb)<br>TBR: 60,917,446-60,957,446 (40 kb)<br>TAD: 60,957,446-61,317,446 (360kb)<br>TBR: 61,317,446-61,557,446 (240kb)<br>TAD: 61,557,446-62,037,446 (480kb)<br>TAD: 62,037,446-62,517,446 (480kb)<br>TBR: 62,517,446-62,557,446 (40kb)<br>TAD: 62,557,446-64,037,446 (1.48 Mb)<br>TBR: 64,037,446-64,117,446 (80kb) |
| DGAP247 | 8q11.21       | TBR: 48,677,447-48,917,447 (240kb)<br>TAD: 48,917,447-49,837,447 (920kb)<br>TBR: 49,837,447-49,877,447 (40kb)<br>TAD: 49,877,447-52,757,447 (2.88 Mb)<br>TBR: 52,757,447-52,957,447 (200kb)<br>TAD: 52,957,447-53,317,447 (360kb)<br>TBR: 53,317,447-53,437,447 (120kb)<br>TAD: 53,437,447-54,797,447 (1.36 Mb)                                      |
|         | 8q24.23       | TAD: 134,490,818-135,890,818 (1.4 Mb)<br>TAD: 135,890,818-137,770,818 (1.88 Mb)<br>TAD: 137,770,818-139,130,818 (1.36 Mb)                                                                                                                                                                                                                            |
| DGAP248 | 2p12          | TAD: 75,866,492-76,826,492 (960kb)<br>TBR: 76,826,492-77,146,492 (80kb)<br>TAD: 77,146,492-79,226,492 (2.08 Mb)<br>TAD: 79,226,492-80,146,489 (919kb)<br>TBR: 80,146,489-80,266,489 (120kb)                                                                                                                                                          |
|         | 13q13.2       | TAD: 32,902,000-34,342,000 (1.44 Mb)<br>TBR: 34,342,000-34,382,000 (40kb)<br>TAD: 34,382,000-36,542,000 (2.16 Mb)<br>TAD: 36,542,000-37,582,000 (1.04 Mb)<br>TBR: 37,582,000-37,622,000 (40kb)                                                                                                                                                       |
| DGAP258 | 6p25.3        | TAD: 135,000-1,455,001 (1.32 Mb)<br>TAD: 1,455,001-2,735,001 (1.28 Mb)<br>TBR: 2,735,001-2,775,001 (40kb)                                                                                                                                                                                                                                            |
|         | 6q16.1        | TAD: 90,623,279-91,183,279 (560kb)<br>TBR: 91,183,279-91,223,279 (40kb)<br>TAD: 91,223,279-93,463,279 (2.24 Mb)<br>TBR: 93,463,279-93,503,279 (40kb)<br>TAD: 93,503,279-94,143,279 (640kb)                                                                                                                                                           |
| DGAP259 | 3p26.3        | TAD: 60,000-2,145,000 (2.085 Mb)<br>TBR: 2,145,000-2,225,000 (80kb)<br>TAD: 2,225,000-3,225,000 (1 Mb)                                                                                                                                                                                                                                               |
|         | 3p24.3        | TAD: 15,624,996-16,304,996 (680kb)<br>TAD: 16,304,996-16,624,996 (320kb)<br>TAD: 16,624,996-17,304,996 (680kb)<br>TAD: 17,304,996-17,904,996 (600kb)<br>TAD: 17,904,996-18,464,996 (560kb)<br>TBR: 18,464,996-18,504,996 (40kb)<br>TAD: 18,504,996-19,064,996 (560kb)                                                                                |
|         | 5q14.3        | TAD: 86,684,244-88,004,244 (1.32 Mb)<br>TAD: 88,004,244-90,124,244 (2.12 Mb)                                                                                                                                                                                                                                                                         |
|         | 7q35          | TAD: 145,809,067-147,969,067 (2.16 Mb)<br>TAD: 147,969,067-148,209,067 (240kb)<br>TAD: 148,209,067-148,649,067 (440kb)<br>TBR: 148,649,067-148,809,067 (160kb)<br>TAD: 148,809,067-149,129,067 (320kb)                                                                                                                                               |
|         | 7q36.3        | TBR: 153,729,067-155,147,248 (1.418 Mb)<br>TAD: 155,147,248-155,587,239 (439kb)<br>TAD: 155,587,239-157,187,239 (1.6 Mb)<br>TAD: 157,187,239-159,128,663 (1.94 Mb)                                                                                                                                                                                   |
|         | 9p23          | TAD: 7,570,000-8,330,000 (760kb)<br>TAD: 8,330,000-9,290,000 (960kb)<br>TAD: 9,290,000-9,970,000 (680kb)<br>TAD: 9,970,000-11,370,000 (1.4 Mb)                                                                                                                                                                                                       |

| Case                          | Next-Gen Band | TAD and TBR nucleotides [hESC, GRCh37/hg19] <sup>25</sup> (size)                                                                                                                                                        |
|-------------------------------|---------------|-------------------------------------------------------------------------------------------------------------------------------------------------------------------------------------------------------------------------|
| <b>DGAP259</b><br>(continued) | 18p11.31      | TAD: 3,690,000-5,090,000 (1.4 Mb)<br>TAD: 5,090,000-6,530,000 (1.44 Mb)<br>TAD: 6,530,000-6,930,000 (400kb)<br>TAD: 6,930,000-7,210,000 (280kb)<br>TAD: 7,210,000-8,530,000 (1.32Mb)<br>TBR: 8,530,000-8,610,000 (80kb) |
|                               | 18q21.3       | TBR: 52,649,002-52,729,002 (320kb)<br>TAD: 52,729,002-54,329,002 (1.6 Mb)<br>TAD: 54,329,002-55,289,002 (960kb)<br>TAD: 55,289,002-56,169,020 (880kb)                                                                   |
| <b>DGAP268</b>                | 10p12.31      | TAD: 21,159,994-22,239,994 (1.08 Mb)<br>TBR: 22,239,994-22,279,994 (40kb)<br>TAD: 22,279,994-23,399,994 (1.12 Mb)                                                                                                       |
|                               | 10p12.2       | TAD: 23,399,994-24,839,994 (1.44 Mb)<br>TBR: 24,839,994-24,879,994 (40kb)                                                                                                                                               |
|                               | 10q23.32      | TAD: 92,650,020-93,690,020 (1.04 Mb)<br>TBR: 93,690,020-93,770,020 (80kb)<br>TAD: 93,770,020-94,210,020 (440kb)<br>TBR: 94,210,020-94,410,020 (200kb)<br>TAD: 94,410,020-95,290,010 (879.99kb)                          |
| <b>DGAP285</b>                | Xp11.2        | TBR: 55,103,275-55,143,275 (40kb)<br>TAD: 55,143,275-56,263,275 (1.12 Mb)<br>TBR: 56,263,275-56,303,275 (40kb)                                                                                                          |
|                               | Xq28          | TBR: 148,592,095-149,929,342 (1.337 Mb)<br>TAD: 149,929,342-150,249,342 (320kb)<br>TBR: 150,249,342-150,289,342 (40kb)<br>TAD: 150,289,342-150,889,344 (600kb)                                                          |
| <b>DGAP288</b>                | 6q21          | TBR: 112,413,307-112,493,307 (80kb)<br>TAD: 112,493,307-114,253,307 (1.76 Mb)                                                                                                                                           |
|                               | 17q24.3       | TBR: 68,608,405-68,648,405 (40kb)<br>TAD: 68,648,405-70,528,405 (1.88 Mb)<br>TBR: 70,528,405-70,568,405 (40kb)                                                                                                          |
| <b>DGAP290</b>                | 2q32.3        | TAD: 196,211,755-196,931,755 (720kb)<br>TAD: 196,931,755-198,251,755 (1.32 Mb)<br>TAD: 198,251,755-198,651,755 (400kb)                                                                                                  |
|                               | 7q33          | TAD: 134,309,460-134,949,460 (640kb)<br>TAD: 134,949,460-136,829,460 (1.88 Mb)<br>TAD: 136,829,460-137,309,460 (480kb)                                                                                                  |
| <b>DGAP295</b>                | 2p13.3        | TAD: 69,186,496-69,546,496 (360kb)<br>TBR: 69,546,496-69,586,496 (40kb)<br>TAD: 69,586,496-70,106,496 (520kb)<br>TAD: 70,106,496-70,506,496 (400kb)                                                                     |
|                               | 11p15.5       | TAD: 850,000-1,523,424 (673kb)<br>TBR: 1,523,424-1,603,424 (80kb)<br>TAD: 1,603,424-2,203,424 (600kb)<br>TAD: 2,203,424-2,443,424 (240kb)                                                                               |

**Table S3. Convergent Genomic Analysis of DGAP239 6q13 breakpoints**

| DGAP239: 6q13 breakpoints on Rearrangement_A: 70,405,86{7-8} and Rearrangement_B: 70,405,86{7-9} |                           |                                                   |                    |                           |                     |                  |                                                                                                                                                                                                                                                                                                                                                    |
|--------------------------------------------------------------------------------------------------|---------------------------|---------------------------------------------------|--------------------|---------------------------|---------------------|------------------|----------------------------------------------------------------------------------------------------------------------------------------------------------------------------------------------------------------------------------------------------------------------------------------------------------------------------------------------------|
| Genes                                                                                            | Nucleotides (GRCh37/hg19) | Description                                       | OMIM <sup>26</sup> | OMIM Morbid <sup>26</sup> | DDG2P <sup>27</sup> | %HI <sup>8</sup> | Notes                                                                                                                                                                                                                                                                                                                                              |
| <i>ADGRB3</i>                                                                                    | 69345259-70099403         | Adhesion G Protein-Coupled Receptor B3            | +                  | -                         | -                   | 3.02             | No reported phenotypic association<br>Homologous to <i>ADGRB1</i> , an angiogenesis inhibitor that is a candidate for involvement in development of glioblastoma. <sup>28</sup>                                                                                                                                                                    |
| <i>LMBRD1</i> (Disrupted)                                                                        | 70385694-70507003         | LMBR1 Domain Containing 1                         | +                  | +                         | +                   | 12.92            | Biallelic loss of function (autosomal recessive) is associated with Methylmalonic Aciduria and Homocystinuria, cbIF type. <sup>29</sup><br>(no phenotype overlap with DGAP239)                                                                                                                                                                     |
| <i>COL19A1</i>                                                                                   | 70576463-70919679         | Collagen, Type XIX, Alpha 1                       | +                  | -                         | -                   | 26.71            |                                                                                                                                                                                                                                                                                                                                                    |
| <i>COL9A1</i>                                                                                    | 70924764-71012786         | Collagen, Type IX, Alpha 1                        | +                  | +                         | +                   | 23.89            | Some evidence for haploinsufficiency (autosomal dominant, monoallelic mode) exists for the Multiple Epiphyseal Dysplasia type 6 (MED6) phenotype. However, it has been reported that although mutations in <i>COL9A1</i> can cause MED, they are not the major causes of MED and at least one additional locus exists in such cases. <sup>30</sup> |
| <i>FAM135A</i>                                                                                   | 71122644-71270877         | Family With Sequence Similarity 135, Member A     | -                  | -                         | -                   | 26.1             |                                                                                                                                                                                                                                                                                                                                                    |
| <i>SDHAF4</i>                                                                                    | 71276620-71299272         | Succinate Dehydrogenase Complex Assembly Factor 4 | -                  | -                         | -                   | 63.15            |                                                                                                                                                                                                                                                                                                                                                    |
| <i>SMAP1</i>                                                                                     | 71377479-71571718         | Small Arfgap 1                                    | +                  | -                         | -                   | 34.54            |                                                                                                                                                                                                                                                                                                                                                    |
| <i>B3GAT2</i>                                                                                    | 71566382-71666741         | Beta-1,3-Glucuronyltransferase 2                  | +                  | -                         | -                   | 33.88            |                                                                                                                                                                                                                                                                                                                                                    |

DDG2P: Developmental Disorders Genotype-to-Phenotype Database, +: Confirmed DDG2P gene, HI: Haploinsufficiency index (in red if <10%)

Shaded rows: Protein coding genes located within the same hESC topologically associated domain (TAD)<sup>25</sup> with the breakpoints



**Table S4. Convergent Genomic Analysis of DGAP239 8q12.2 breakpoints**

| DGAP239: 8q12.2 breakpoints on Rearrangement_A: 61,628,67{1-2} and Rearrangement_B: 61,628,66{7-9} |                           |                                                                        |                    |                           |                     |                  |                                                                                                                                                                                                                                                                                                        |
|----------------------------------------------------------------------------------------------------|---------------------------|------------------------------------------------------------------------|--------------------|---------------------------|---------------------|------------------|--------------------------------------------------------------------------------------------------------------------------------------------------------------------------------------------------------------------------------------------------------------------------------------------------------|
| Genes                                                                                              | Nucleotides (GRCh37/hg19) | Description                                                            | OMIM <sup>26</sup> | OMIM Morbid <sup>26</sup> | DDG2P <sup>27</sup> | %HI <sup>8</sup> | Notes                                                                                                                                                                                                                                                                                                  |
| <i>NSMAF</i>                                                                                       | 59496063-59572403         | Neutral Sphingomyelinase (N-SMase) Activation Associated Factor        | +                  | -                         | -                   | 39.33            |                                                                                                                                                                                                                                                                                                        |
| <i>TOX</i>                                                                                         | 59717977-60031767         | Thymocyte Selection-Associated High Mobility Group Box                 | +                  | -                         | -                   | 2.83             | Linkage-disequilibrium mapping of a pulmonary tuberculosis susceptibility locus near the 3' end of <i>TOX</i> <sup>31</sup>                                                                                                                                                                            |
| <i>CA8</i>                                                                                         | 61099906-61193971         | Carbonic Anhydrase VIII                                                | +                  | +                         | +                   | 10.02            | Biallelic loss of function (autosomal recessive) associated with Cerebellar Ataxia, Mental Retardation, and Dysequilibrium Syndrome 3 <sup>32</sup>                                                                                                                                                    |
| <i>RAB2A</i>                                                                                       | 61429416-61536186         | RAB2A, Member RAS Oncogene Family                                      | +                  | -                         | -                   | 11.01            |                                                                                                                                                                                                                                                                                                        |
| <i>CHD7</i> (Disrupted)                                                                            | 61591337-61779465         | Chromodomain Helicase DNA Binding Protein 7                            | +                  | +                         | +                   | 2.4              | Haploinsufficiency (autosomal dominant, monoallelic) reported in association with CHARGE syndrome, with mutations in over 90% of cases meeting diagnostic criteria of CHARGE syndrome <sup>33</sup> (Consistent with the clinical diagnosis of CHARGE syndrome during the postnatal period of DGAP239) |
| <i>CLVS1</i>                                                                                       | 61969717-62414204         | Clavesin 1                                                             | +                  | -                         | -                   | 14.59            |                                                                                                                                                                                                                                                                                                        |
| <i>ASPH</i>                                                                                        | 62413116-62627155         | Aspartate Beta-Hydroxylase                                             | +                  | +                         | P                   | 46.75            | Biallelic loss of function (autosomal recessive) associated with Traboulsi Syndrome <sup>34</sup>                                                                                                                                                                                                      |
| <i>NKAIN3</i>                                                                                      | 63161150-63912211         | Na <sup>+</sup> /K <sup>+</sup> Transporting Atpase Interacting 3      | +                  | -                         | -                   | 24.34            |                                                                                                                                                                                                                                                                                                        |
| <i>GGH</i>                                                                                         | 63927638-63951730         | Gamma-Glutamyl Hydrolase (Conjugase, Folylpolygammaglutamyl Hydrolase) | +                  | -                         | -                   | 63.59            |                                                                                                                                                                                                                                                                                                        |
| <i>TTPA</i>                                                                                        | 63961112-63998612         | Tocopherol (Alpha) Transfer Protein                                    | +                  | +                         | -                   | 46.94            | Biallelic loss of function (autosomal recessive) associated with Ataxia with Isolated Vitamin E Deficiency <sup>35</sup>                                                                                                                                                                               |
| <i>YTHDF3</i>                                                                                      | 64081112-64125346         | YTH N(6)-Methyladenosine RNA Binding Protein 3                         | -                  | -                         | -                   | 6.55             | No reported phenotype association                                                                                                                                                                                                                                                                      |

DDG2P: Developmental Disorders Genotype-to-Phenotype Database, +: Confirmed DDG2P gene, P: Probable DDG2P gene, HI: Haploinsufficiency index (in red if <10%)  
 Shaded rows: Protein coding genes located within the same hESC topologically associated domain (TAD)<sup>25</sup> with the breakpoints

**Table S5. Convergent Genomic Analysis of DGAP247 8q11.2 breakpoints.**

| DGAP247: 8q11.2 breakpoints on Rearrangement_A: 51,889,501 and Rearrangement_B: 51,889,502 |                           |                                                                              |                                |                           |                                 |                  |                                                                                                                                                                                                                              |
|--------------------------------------------------------------------------------------------|---------------------------|------------------------------------------------------------------------------|--------------------------------|---------------------------|---------------------------------|------------------|------------------------------------------------------------------------------------------------------------------------------------------------------------------------------------------------------------------------------|
| Genes                                                                                      | Nucleotides (GRCh37/hg19) | Description                                                                  | OMIM <sup>2</sup> <sub>6</sub> | OMIM Morbid <sup>26</sup> | DDG2P <sup>2</sup> <sub>7</sub> | %HI <sup>8</sup> | Notes                                                                                                                                                                                                                        |
| <i>PRKDC</i>                                                                               | 48685669-48872743         | Protein Kinase, DNA-Activated, Catalytic Polypeptide                         | +                              | -                         | -                               | 10.36            |                                                                                                                                                                                                                              |
| <i>MCM4</i>                                                                                | 48872745-48890720         | Minichromosome Maintenance Complex Component 4                               | +                              | +                         | -                               | 13.9             | Biallelic loss of function (autosomal recessive) associated with Natural Killer Cell and Glucocorticoid Deficiency with DNA Repair Defect <sup>36</sup>                                                                      |
| <i>UBE2V2</i>                                                                              | 48920960-48977268         | Ubiquitin-Conjugating Enzyme E2 Variant 2                                    | +                              | -                         | -                               | 12.96            |                                                                                                                                                                                                                              |
| <i>EFCAB1</i>                                                                              | 49623348-49647870         | EF-Hand Calcium Binding Domain 1                                             | -                              | -                         | -                               | 44.58            |                                                                                                                                                                                                                              |
| <i>SNAI2</i>                                                                               | 49830249-49834299         | Snail Family Zinc Finger 2                                                   | +                              | +                         | -                               | 5.15             | Haploinsufficiency (autosomal dominant, monoallelic) reported to be associated with piebaldism <sup>37</sup><br>Biallelic loss of function (autosomal recessive) associated with Waardenburg Syndrome, Type 2D <sup>38</sup> |
| <i>C8orf22</i>                                                                             | 49966870-49988649         | Chromosome 8 Open Reading Frame 22                                           | -                              | -                         | -                               | 81.46            |                                                                                                                                                                                                                              |
| <i>SNTG1</i>                                                                               | 50822349-51706678         | Syntrophin, Gamma 1                                                          | +                              | -                         | -                               | 43.69            |                                                                                                                                                                                                                              |
| <i>PXDNL</i>                                                                               | 52232138-52722005         | Peroxidasin-Like                                                             | +                              | -                         | -                               | 85.15            |                                                                                                                                                                                                                              |
| <i>PCMTD1</i>                                                                              | 52730140-52811735         | Protein-L-Isoaspartate (D-Aspartate) O-Methyltransferase Domain Containing 1 | -                              | -                         | -                               | 21.84            |                                                                                                                                                                                                                              |
| <i>ST18</i>                                                                                | 53023399-53373519         | Suppression Of Tumorigenicity 18, Zinc Finger                                | -                              | -                         | -                               | 15.51            |                                                                                                                                                                                                                              |
| <i>FAM150A</i>                                                                             | 53446597-53478067         | Family With Sequence Similarity 150, Member A                                | -                              | -                         | -                               | 80.59            |                                                                                                                                                                                                                              |
| <i>RB1CC1</i>                                                                              | 53535016-53658403         | RB1-Inducible Coiled-Coil 1                                                  | +                              | -                         | -                               | 10.33            |                                                                                                                                                                                                                              |
| <i>NPBWR1</i>                                                                              | 53850991-53853677         | Neuropeptides B/W Receptor 1                                                 | +                              | -                         | -                               | 47.38            |                                                                                                                                                                                                                              |
| <i>OPRK1</i>                                                                               | 54138284-54164257         | Opioid Receptor, Kappa 1                                                     | +                              | -                         | -                               | 28.99            |                                                                                                                                                                                                                              |
| <i>ATP6V1H</i>                                                                             | 54628117-54756118         | Atpase, H+ Transporting, Lysosomal 50/57 kda, V1 Subunit H                   | +                              | -                         | -                               | 20.78            |                                                                                                                                                                                                                              |
| <i>RGS20</i>                                                                               | 54764368-54871863         | Regulator Of G-Protein Signaling 20                                          | +                              | -                         | -                               | 69.9             |                                                                                                                                                                                                                              |

DDG2P: Developmental Disorders Genotype-to-Phenotype Database, +: Confirmed DDG2P gene, HI: Haploinsufficiency index (in red if <10%)

Shaded rows: Protein coding genes located within the same hESC topologically associated domain (TAD)<sup>25</sup> with the breakpoints

**Table S6. Convergent Genomic Analysis of DGAP247 8q24.23 breakpoints**

| DGAP247: 8q24.23 breakpoints on Rearrangement_A: 136,495,820 and Rearrangement_B: 136,495,823 |                           |                                                                     |                                |                           |                     |                  |                                   |
|-----------------------------------------------------------------------------------------------|---------------------------|---------------------------------------------------------------------|--------------------------------|---------------------------|---------------------|------------------|-----------------------------------|
| Genes                                                                                         | Nucleotides (GRCh37/hg19) | Description                                                         | OMIM <sub>6</sub> <sup>2</sup> | OMIM Morbid <sup>26</sup> | DDG2P <sup>27</sup> | %HI <sup>8</sup> | Notes                             |
| <i>ST3GAL1</i>                                                                                | 134467091-134584183       | ST3 Beta-Galactoside Alpha-2,3-Sialyltransferase 1                  | +                              | -                         | -                   | 61.67            |                                   |
| <i>ZFAT</i>                                                                                   | 135490031-135725292       | Zinc Finger And AT Hook Domain Containing                           | +                              | -                         | -                   | 57.4             |                                   |
| <i>KHDRBS3</i> (Disrupted)                                                                    | 136469700-136668965       | KH Domain Containing, RNA Binding, Signal Transduction Associated 3 | +                              | -                         | -                   | 10.52            | No reported phenotype association |

DDG2P: Developmental Disorders Genotype-to-Phenotype Database, +: Confirmed DDG2P gene, HI: Haploinsufficiency index (in red if <10%)

Shaded row: Protein coding gene located within the same hESC topologically associated domain (TAD)<sup>25</sup> with the breakpoints

**Table S7. Convergent Genomic Analysis of DGAP248 2p12 breakpoints**

| DGAP248: 2p12 breakpoints on Rearrangement_A: 78,301,91{1-2} and Rearrangement_B: 78,301,90{8-5} |                           |                                                |                    |                           |                     |                  |                                                                                                                                                                                                  |
|--------------------------------------------------------------------------------------------------|---------------------------|------------------------------------------------|--------------------|---------------------------|---------------------|------------------|--------------------------------------------------------------------------------------------------------------------------------------------------------------------------------------------------|
| Genes                                                                                            | Nucleotides (GRCh37/hg19) | Description                                    | OMIM <sup>26</sup> | OMIM Morbid <sup>26</sup> | DDG2P <sup>27</sup> | %HI <sup>8</sup> | Notes                                                                                                                                                                                            |
| <i>MRPL19</i>                                                                                    | 75873909-75917977         | Mitochondrial Ribosomal Protein L19            | +                  | -                         | -                   | 41.5             |                                                                                                                                                                                                  |
| <i>GCFC2</i>                                                                                     | 75879126-75938115         | GC-Rich Sequence DNA-Binding Factor 2          | +                  | -                         | -                   | 68.95            |                                                                                                                                                                                                  |
| <i>LRRTM4</i>                                                                                    | 76974845-77820445         | Leucine Rich Repeat Transmembrane Neuronal 4   | +                  | -                         | -                   | 7.26             | No reported phenotype association<br>Structure and expression profile of <i>LRRTM</i> mRNAs in mice suggest a role in development and maintenance of the vertebrate nervous system <sup>13</sup> |
| <i>REG3G</i>                                                                                     | 79252812-79255631         | Regenerating Islet-Derived 3 Gamma             | +                  | -                         | -                   | 90.1             |                                                                                                                                                                                                  |
| <i>REG1B</i>                                                                                     | 79312156-79315145         | Regenerating Islet-Derived 1 Beta              | +                  | -                         | -                   | 94.05            |                                                                                                                                                                                                  |
| <i>REG1A</i>                                                                                     | 79347488-79350545         | Regenerating Islet-Derived 1 Alpha             | +                  | -                         | -                   | 91.34            |                                                                                                                                                                                                  |
| <i>REG3A</i>                                                                                     | 79384132-79386879         | Regenerating Islet-Derived 3 Alpha             | +                  | -                         | -                   | 92.13            |                                                                                                                                                                                                  |
| <i>CTNNA2</i>                                                                                    | 79412357-80875905         | Catenin (Cadherin-Associated Protein), Alpha 2 | +                  | -                         | -                   | 2.24             | No reported phenotype association                                                                                                                                                                |

DDG2P: Developmental Disorders Genotype-to-Phenotype Database, +: Confirmed DDG2P gene, HI: Haploinsufficiency index (in red if <10%)

Shaded row: Protein coding gene located within the same hESC topologically associated domain (TAD)<sup>25</sup> with the breakpoints

**Table S8. Convergent Genomic Analysis of DGAP248 13q13.2 breakpoints**

| DGAP248: 13q13.2 breakpoints on Rearrangement_A: 34,542,73{2-1} and Rearrangement_B: 34,542,7{20-23} |                           |                                                                 |                     |                                       |                     |                  |                                                                                                                                                                                                                                                                              |
|------------------------------------------------------------------------------------------------------|---------------------------|-----------------------------------------------------------------|---------------------|---------------------------------------|---------------------|------------------|------------------------------------------------------------------------------------------------------------------------------------------------------------------------------------------------------------------------------------------------------------------------------|
| Genes                                                                                                | Nucleotides (GRCh37/hg19) | Description                                                     | OMI M <sup>26</sup> | OMIM Morbid <sub>6</sub> <sup>2</sup> | DDG2P <sup>27</sup> | %HI <sup>8</sup> | Notes                                                                                                                                                                                                                                                                        |
| <i>BRCA2</i>                                                                                         | 32889611-32973805         | Breast Cancer 2, Early Onset                                    | +                   | +                                     | +                   | 13.3             | Germline mutations associated with familial Breast-Ovarian Cancer Susceptibility 2 <sup>39</sup> , homozygous or compound heterozygous mutations involved in Fanconi anemia complementation group D1 <sup>40</sup>                                                           |
| <i>N4BP2L2</i>                                                                                       | 33006554-33112970         | NEDD4 Binding Protein 2-Like 2                                  | +                   | -                                     | -                   | 75.5             |                                                                                                                                                                                                                                                                              |
| <i>PDS5B</i>                                                                                         | 33160564-33352157         | PDS5 Cohesin Associated Factor B                                | +                   | -                                     | -                   | 24.83            |                                                                                                                                                                                                                                                                              |
| <i>KL</i>                                                                                            | 33590207-33640282         | Klotho                                                          | +                   | +                                     | -                   | 16.22            | Biallelic loss of function (autosomal recessive) associated with Hyperphosphatemic Familial Tumoral Calcinosis <sup>41</sup>                                                                                                                                                 |
| <i>STARD13</i>                                                                                       | 33677272-33924767         | Star-Related Lipid Transfer (START) Domain Containing 13        | +                   | -                                     | -                   | 41.15            |                                                                                                                                                                                                                                                                              |
| <i>RFC3</i> (Disrupted)                                                                              | 34392186-34540695         | Replication Factor C (Activator 1) 3, 38 kda                    | +                   | -                                     | -                   | 4.93             | No reported phenotype association                                                                                                                                                                                                                                            |
| <i>NBEA</i>                                                                                          | 35516424-36247159         | Neurobeachin                                                    | +                   | -                                     | -                   | 6.83             | Disrupted in a patient with a <i>de novo</i> translocation and idiopathic autism, <sup>10</sup> a linkage study implicated its localization on chromosome 15 for autism <sup>42</sup> and haploinsufficiency causes autism-like behaviors in animal models <sup>11, 12</sup> |
| <i>MAB21L1</i>                                                                                       | 36047926-36050832         | Mab-21-Like 1 (C. Elegans)                                      | +                   | -                                     | -                   | 10.38            |                                                                                                                                                                                                                                                                              |
| <i>DCLK1</i>                                                                                         | 36345478-36705443         | Doublecortin-Like Kinase 1                                      | +                   | -                                     | -                   | 6.47             | No reported phenotype association<br>A microtubule-associated kinase that can undergo autophosphorylation <sup>43</sup>                                                                                                                                                      |
| <i>SOHLH2</i>                                                                                        | 36742345-36871979         | Spermatogenesis And Oogenesis Specific Basic Helix-Loop-Helix 2 | +                   | -                                     | -                   | 71.56            |                                                                                                                                                                                                                                                                              |
| <i>CCDC169</i>                                                                                       | 36801182-36871977         | Coiled-Coil Domain Containing 169                               | -                   | -                                     | -                   | 79.84            |                                                                                                                                                                                                                                                                              |
| <i>SPG20</i>                                                                                         | 36875775-36944317         | Spastic Paraplegia 20 (Troyer Syndrome)                         | +                   | +                                     | -                   | 43.36            | Biallelic loss of function (autosomal recessive) associated with Spastic Paraplegia 20 <sup>44</sup>                                                                                                                                                                         |
| <i>CCNA1</i>                                                                                         | 37005967-37017019         | Cyclin A1                                                       | +                   | -                                     | -                   | 33.13            |                                                                                                                                                                                                                                                                              |
| <i>SERTM1</i>                                                                                        | 37248049-37271976         | Serine-Rich And Transmembrane Domain Containing 1               | -                   | -                                     | -                   | 49.92            |                                                                                                                                                                                                                                                                              |
| <i>RFXAP</i>                                                                                         | 37393361-37403241         | Regulatory Factor X-Associated Protein                          | +                   | +                                     | -                   | 65.91            | Biallelic loss of function (autosomal recessive) associated with B lymphocyte syndrome, type II, complementation group D <sup>45</sup>                                                                                                                                       |
| <i>SMAD9</i>                                                                                         | 37418968-37494902         | SMAD Family Member 9                                            | +                   | +                                     | -                   | 11.22            | Haploinsufficiency (autosomal dominant, monoallelic) reported to be associated with primary pulmonary hypertension, type 2 <sup>46</sup>                                                                                                                                     |
| <i>ALG5</i>                                                                                          | 37523912-37574398         | ALG5, Dolichyl-Phosphate Beta-Glucosyltransferase               | +                   | -                                     | -                   | 22.12            |                                                                                                                                                                                                                                                                              |
| <i>EXOSC8</i>                                                                                        | 37572953-37583750         | Exosome Component 8                                             | +                   | -                                     | -                   | 6.92             | Biallelic loss of function (autosomal recessive) associated with Pontocerebellar hypoplasia, type 1C <sup>47</sup>                                                                                                                                                           |
| <i>SUPT20H</i>                                                                                       | 37583449-37633850         | Suppressor Of Ty 20 Homolog ( <i>S. Cerevisiae</i> )            | +                   | -                                     | -                   | 18.6             |                                                                                                                                                                                                                                                                              |

DDG2P: Developmental Disorders Genotype-to-Phenotype Database, +: Confirmed DDG2P gene, HI: Haploinsufficiency index  
 Shaded rows: Protein coding genes located within the same hESC topologically associated domain (TAD)<sup>25</sup> with the breakpoints

**Table S9. Convergent Genomic Analysis of DGAP258 6p25.3 breakpoints**

| DGAP 258: 6p25.3 breakpoints on Rearrangement_A: 776,81{6} and Rearrangement_B: 776,787 |                           |                                            |                    |                           |                     |                  |                                                                                                                                                                                                                                                                                                              |
|-----------------------------------------------------------------------------------------|---------------------------|--------------------------------------------|--------------------|---------------------------|---------------------|------------------|--------------------------------------------------------------------------------------------------------------------------------------------------------------------------------------------------------------------------------------------------------------------------------------------------------------|
| Genes                                                                                   | Nucleotides (GRCh37/hg19) | Description                                | OMIM <sup>26</sup> | OMIM Morbid <sup>26</sup> | DDG2P <sup>27</sup> | %HI <sup>8</sup> | Notes                                                                                                                                                                                                                                                                                                        |
| <i>FOXF2</i>                                                                            | 1390069-1395832           | Forkhead Box F2                            | +                  | -                         | -                   | 29.64            |                                                                                                                                                                                                                                                                                                              |
| <i>FOXC1</i>                                                                            | 1610681-1614127           | Forkhead Box C1                            | +                  | +                         | +                   | 9.01             | Haploinsufficiency (autosomal dominant, monoallelic) reported to be associated with multiple ocular malformation syndromes including Peters anomaly (PAN), iridogoniodysgenesis anomaly (IGDA), Axenfeld-Rieger syndrome type 3 (RIEG3) <sup>48; 49</sup> and 6p25.3 Dandy-Walker malformation <sup>50</sup> |
| <i>GMDS</i>                                                                             | 1624041-2245926           | GDP-Mannose 4,6-Dehydratase                | +                  | -                         | -                   | 3.84             | Suggestive association with 6p25.3 Dandy-Walker malformation along with deletion of <i>FOXC1</i> <sup>50</sup>                                                                                                                                                                                               |
| <i>MYLK4</i>                                                                            | 2663863-2751200           | myosin light chain kinase family, member 4 | -                  | -                         | -                   | 57.67            |                                                                                                                                                                                                                                                                                                              |
| <i>WRNIP1</i>                                                                           | 2765648-2787186           | Werner helicase interacting protein 1      | +                  | -                         | -                   | 36.94            |                                                                                                                                                                                                                                                                                                              |

DDG2P: Developmental Disorders Genotype-to-Phenotype Database, +: Confirmed DDG2P gene, HI: Haploinsufficiency index (in red if <10%)

Shaded row: Protein coding gene located within the same hESC topologically associated domain (TAD)<sup>25</sup> with the breakpoints

**Table S10. Convergent Genomic Analysis of DGAP258 6q16.1 breakpoints**

| DGAP258: 6q16.1 breakpoints on Rearrangement_A: 93,191,54{7} and Rearrangement_B: 93,191,545 |                           |                                                                     |                    |                           |                     |                  |                                   |
|----------------------------------------------------------------------------------------------|---------------------------|---------------------------------------------------------------------|--------------------|---------------------------|---------------------|------------------|-----------------------------------|
| Genes                                                                                        | Nucleotides (GRCh37/hg19) | Description                                                         | OMIM <sup>26</sup> | OMIM Morbid <sup>26</sup> | DDG2P <sup>27</sup> | %HI <sup>8</sup> | Notes                             |
| <i>BACH2</i>                                                                                 | 90636248-91006627         | BTB and CNC Homology 1, Basic Leucine Zipper Transcription Factor 2 | +                  | -                         | -                   | 7.84             | No reported phenotype association |
| <i>MAP3K7</i>                                                                                | 91223292-91296764         | Mitogen-Activated Protein Kinase Kinase Kinase 7                    | +                  | -                         | -                   | 2.75             | No reported phenotype association |
| <i>EPHA7</i>                                                                                 | 93949738-94129265         | EPH Receptor A7                                                     | +                  | -                         | -                   | 2.77             | No reported phenotype association |

DDG2P: Developmental Disorders Genotype-to-Phenotype Database, +: Confirmed DDG2P gene, HI: Haploinsufficiency index (in red if <10%)

Shaded row: Protein coding gene located within the same hESC topologically associated domain (TAD)<sup>25</sup> with the breakpoints

**Table S11. Convergent Genomic Analysis of DGAP259 3p26.3 breakpoints**

| DGAP259: 3p26.3 breakpoints on Rearrangement_D: 1,408,99{6} and Rearrangement_G: 1,408,984 |                           |                                             |                    |                           |                     |                  |                                                                                                                                                                                                                                                                                                                                                                         |
|--------------------------------------------------------------------------------------------|---------------------------|---------------------------------------------|--------------------|---------------------------|---------------------|------------------|-------------------------------------------------------------------------------------------------------------------------------------------------------------------------------------------------------------------------------------------------------------------------------------------------------------------------------------------------------------------------|
| Genes                                                                                      | Nucleotides (GRCh37/hg19) | Description                                 | OMIM <sup>26</sup> | OMIM Morbid <sup>26</sup> | DDG2P <sup>27</sup> | %HI <sup>8</sup> | Notes                                                                                                                                                                                                                                                                                                                                                                   |
| <i>CNTN6</i><br>(Disrupted)                                                                | 1134260-1445901           | Contactin 6                                 | +                  | -                         | -                   | 39.69            | No reported phenotype association<br>A neural adhesion molecule of the contactin subgroup of the immunoglobulin superfamily <sup>51</sup>                                                                                                                                                                                                                               |
| <i>CNTN4</i>                                                                               | 2140497-3099645           | Contactin 4                                 | +                  | -                         | -                   | 6.9              | A boy with t(3;10)(p26;q26)dn and characteristic features of 3p- syndrome (autosomal dominant) is reported to have a translocation breakpoint on chromosome 3 within the minimal candidate region for 3p deletion syndrome disrupting the <i>CNTN4</i> mRNA transcript at 3p26.3-p26.2 <sup>52</sup> (relevant to cerebral and renal malformation phenotype of DGAP259) |
| <i>IL5RA</i>                                                                               | 3111233-3168297           | Interleukin 5 Receptor, Alpha               | +                  | -                         | -                   | 87.3             |                                                                                                                                                                                                                                                                                                                                                                         |
| <i>TRNT1</i>                                                                               | 3168600-3192563           | tRNA Nucleotidyl Transferase, CCA-Adding, 1 | +                  | -                         | -                   | 70.26            |                                                                                                                                                                                                                                                                                                                                                                         |
| <i>CRBN</i>                                                                                | 3190676-3221394           | Cereblon                                    | +                  | +                         | -                   | 31.14            |                                                                                                                                                                                                                                                                                                                                                                         |

DDG2P: Developmental Disorders Genotype-to-Phenotype Database, +: Confirmed DDG2P gene, HI: Haploinsufficiency index (in red if <10%)

Shaded rows: Protein coding genes located within the same hESC topologically associated domain (TAD)<sup>25</sup> with the breakpoints



**Table S12. Convergent Genomic Analysis of DGAP259 3p24.3 breakpoints**

| DGAP259: 3p24.3 breakpoints on Rearrangement_A: 17,392,144 and Rearrangement_C: 17,392,136 |                           |                                                              |                    |                           |                     |                  |                                                                                                                                                                                                                                                                                                                                                                                                                                                                                                                                                                                                                                                                                    |
|--------------------------------------------------------------------------------------------|---------------------------|--------------------------------------------------------------|--------------------|---------------------------|---------------------|------------------|------------------------------------------------------------------------------------------------------------------------------------------------------------------------------------------------------------------------------------------------------------------------------------------------------------------------------------------------------------------------------------------------------------------------------------------------------------------------------------------------------------------------------------------------------------------------------------------------------------------------------------------------------------------------------------|
| Genes                                                                                      | Nucleotides (GRCh37/hg19) | Description                                                  | OMIM <sup>26</sup> | OMIM Morbid <sup>26</sup> | DDG2P <sup>27</sup> | %HI <sup>8</sup> | Notes                                                                                                                                                                                                                                                                                                                                                                                                                                                                                                                                                                                                                                                                              |
| <i>BTD</i>                                                                                 | 15642848-15687329         | Biotinidase                                                  | +                  | +                         | +                   | 76.15            | Biallelic loss of function (autosomal recessive) associated with biotinidase deficiency <sup>53</sup>                                                                                                                                                                                                                                                                                                                                                                                                                                                                                                                                                                              |
| <i>ANKRD28</i>                                                                             | 15708743-15901278         | Ankyrin Repeat Domain 28                                     | +                  | -                         | -                   | 19.04            |                                                                                                                                                                                                                                                                                                                                                                                                                                                                                                                                                                                                                                                                                    |
| <i>GALNT15</i>                                                                             | 16216156-16273499         | Polypeptide N-Acetylgalactosaminyltransferase 15             | +                  | -                         | -                   | 65.27            |                                                                                                                                                                                                                                                                                                                                                                                                                                                                                                                                                                                                                                                                                    |
| <i>DPH3</i>                                                                                | 16299485-16306479         | Diphthamide Biosynthesis 3                                   | +                  | -                         | -                   | 19.41            |                                                                                                                                                                                                                                                                                                                                                                                                                                                                                                                                                                                                                                                                                    |
| <i>OXNAD1</i>                                                                              | 16306706-16391806         | Oxidoreductase NAD-Binding Domain Containing 1               | -                  | -                         | -                   | 63.97            |                                                                                                                                                                                                                                                                                                                                                                                                                                                                                                                                                                                                                                                                                    |
| <i>RFTN1</i>                                                                               | 16355081-16555533         | Raftlin, Lipid Raft Linker 1                                 | -                  | -                         | -                   | 61.2             |                                                                                                                                                                                                                                                                                                                                                                                                                                                                                                                                                                                                                                                                                    |
| <i>DAZL</i>                                                                                | 16628299-16711813         | Deleted In Azoospermia-Like                                  | +                  | -                         | -                   | 15.92            |                                                                                                                                                                                                                                                                                                                                                                                                                                                                                                                                                                                                                                                                                    |
| <i>PLCL2</i>                                                                               | 16844159-17132086         | Phospholipase C-Like 2                                       | +                  | -                         | -                   | 38.08            |                                                                                                                                                                                                                                                                                                                                                                                                                                                                                                                                                                                                                                                                                    |
| <i>TBC1D5</i> (Disrupted)                                                                  | 17198654-18486309         | TBC1 Domain Family, Member 5                                 | +                  | -                         | -                   | 5.84             | No reported phenotype association                                                                                                                                                                                                                                                                                                                                                                                                                                                                                                                                                                                                                                                  |
| <i>SATB1</i>                                                                               | 18386879-18487080         | SATB Homeobox 1 (Special AT-rich sequence-binding protein-1) | +                  | -                         | -                   | 2.15             | A global <b>genome-organizer</b> and matrix attachment region-binding protein mediating chromatin looping by tethering multiple genomic loci and recruiting chromatin-remodeling enzymes to <b>regulate chromatin structure and gene expression</b> <sup>16, 17</sup> (DGAP259 has a complex chromosome rearrangement involving five different chromosomes.)<br>Role in cortical neurons to facilitate neuronal plasticity and regulate expression of key neuronal genes <sup>54</sup> and required for medial ganglionic eminence-derived interneuron differentiation, connectivity, and survival <sup>55</sup> ( <b>relevant to cerebral malformation phenotype of DGAP259</b> ) |

DDG2P: Developmental Disorders Genotype-to-Phenotype Database, +: Confirmed DDG2P gene, HI: Haploinsufficiency index (in red if <10%)

Shaded row: Protein coding gene located within the same hESC topologically associated domain (TAD)<sup>25</sup> with the breakpoints

**Table S13. Convergent Genomic Analysis of DGAP259 5q14.3 breakpoints**

| DGAP259: 5q14.3 breakpoints on Rearrangement_B: 88,756,2{48-56} and Rearrangement_E: 88,756,2{39-40} |                           |                                                           |                    |                           |                     |                  |                                                                                                                                                                                                                                                                                                                                                                                                                                                                                                                                                                                                                                     |
|------------------------------------------------------------------------------------------------------|---------------------------|-----------------------------------------------------------|--------------------|---------------------------|---------------------|------------------|-------------------------------------------------------------------------------------------------------------------------------------------------------------------------------------------------------------------------------------------------------------------------------------------------------------------------------------------------------------------------------------------------------------------------------------------------------------------------------------------------------------------------------------------------------------------------------------------------------------------------------------|
| Genes                                                                                                | Nucleotides (GRCh37/hg19) | Description                                               | OMIM <sup>26</sup> | OMIM Morbid <sup>26</sup> | DDG2P <sup>27</sup> | %HI <sup>8</sup> | Notes                                                                                                                                                                                                                                                                                                                                                                                                                                                                                                                                                                                                                               |
| <i>RASA1</i>                                                                                         | 86563705-86687748         | RAS p21 Protein Activator (GTPase Activating Protein) 1   | +                  | +                         | +                   | 2.57             | Haploinsufficiency (autosomal dominant, monoallelic) reported to be associated with Parkes Weber Syndrome and Capillary malformation-Arteriovenous malformation <sup>56</sup>                                                                                                                                                                                                                                                                                                                                                                                                                                                       |
| <i>CCNH</i>                                                                                          | 86687311-86708836         | Cyclin H                                                  | +                  | -                         | -                   | 7.31             | Regulation of cell cycle progression, no reported phenotype association                                                                                                                                                                                                                                                                                                                                                                                                                                                                                                                                                             |
| <i>TMEM161B</i>                                                                                      | 87485450-87565293         | Transmembrane Protein 161B                                | -                  | -                         | -                   | 9.65             |                                                                                                                                                                                                                                                                                                                                                                                                                                                                                                                                                                                                                                     |
| <i>MEF2C</i>                                                                                         | 88013975-88199922         | Myocyte Enhancer Factor 2C                                | +                  | +                         | +                   | 0.26             | Haploinsufficiency (autosomal dominant, monoallelic) reported to be associated with Mental retardation, Stereotypic movements, Epilepsy and cerebral malformations (MRSME) <sup>15</sup> and cases with hypoplastic corpus callosum <sup>57; 58</sup> , long range regulation associated phenotype also reported in a <i>de novo</i> translocation case <sup>22</sup> (relevant to cerebral malformation and hypoplastic corpus callosum phenotype of DGAP259)<br><br>Role in synaptic plasticity and hippocampal-dependent learning and memory <sup>59</sup> (9p23 breakpoints of DGAP259 disrupt <i>PTPRD1</i> with similar role) |
| <i>CETN3</i>                                                                                         | 89688078-89705603         | Centrin, EF-Hand Protein, 3                               | +                  | -                         | -                   | 5.94             | Present in centrosomes and lays an important role in early cleavage of frog embryos <sup>60</sup>                                                                                                                                                                                                                                                                                                                                                                                                                                                                                                                                   |
| <i>MBLAC2</i>                                                                                        | 89754020-89770585         | Metallo-Beta-Lactamase Domain Containing 2                | -                  | -                         | -                   | 38.68            |                                                                                                                                                                                                                                                                                                                                                                                                                                                                                                                                                                                                                                     |
| <i>POLR3G</i>                                                                                        | 89767565-89810370         | Polymerase (RNA) III (DNA Directed) Polypeptide G (32kd)  | -                  | -                         | -                   | 38.97            |                                                                                                                                                                                                                                                                                                                                                                                                                                                                                                                                                                                                                                     |
| <i>LYSMD3</i>                                                                                        | 89811428-89825401         | Lysm, Putative Peptidoglycan-Binding, Domain Containing 3 | -                  | -                         | -                   | 28.58            |                                                                                                                                                                                                                                                                                                                                                                                                                                                                                                                                                                                                                                     |
| <i>ADGRV1</i>                                                                                        | 89825161-90460038         | Adhesion G Protein-Coupled Receptor V1                    | +                  | +                         | -                   | 25.58            | Biallelic loss of function (autosomal recessive) associated with Usher syndrome, type 2C <sup>61</sup>                                                                                                                                                                                                                                                                                                                                                                                                                                                                                                                              |

DDG2P: Developmental Disorders Genotype-to-Phenotype Database, +: Confirmed DDG2P gene, HI: Haploinsufficiency index (in red if <10%)

Shaded rows: Protein coding genes located within the same hESC topologically associated domain (TAD)<sup>25</sup> with the breakpoints

**Table S14. Convergent Genomic Analysis of DGAP259 7q35 breakpoints**

| DGAP259: 7q35 breakpoints on Rearrangement_B: 147,718,91{1-9} and Rearrangement_E: 147,718,90{7-8} |                           |                                                           |                    |                           |                     |                  |                                                                                                                                                                                                                                                                                                                                                                                             |
|----------------------------------------------------------------------------------------------------|---------------------------|-----------------------------------------------------------|--------------------|---------------------------|---------------------|------------------|---------------------------------------------------------------------------------------------------------------------------------------------------------------------------------------------------------------------------------------------------------------------------------------------------------------------------------------------------------------------------------------------|
| Genes                                                                                              | Nucleotides (GRCh37/hg19) | Description                                               | OMIM <sup>26</sup> | OMIM Morbid <sup>26</sup> | DDG2P <sup>27</sup> | %HI <sup>8</sup> | Notes                                                                                                                                                                                                                                                                                                                                                                                       |
| <i>CNTNAP2</i><br>(Disrupted)                                                                      | 145813453-148118090       | Contactin Associated Protein-Like 2                       | +                  | +                         | +                   | 4.94             | Susceptibility to Autism type 15 <sup>62</sup> , homozygous or compound heterozygous mutations causing Cortical Dysplasia-I Epilepsy Syndrome <sup>63</sup> and Pitt-Hopkins-like syndrome (PTHSL1) <sup>64</sup> (relevant to cerebral malformation phenotype; DGAP259) (18q21 breakpoints of DGAP259 mapping one downstream of <i>TCF4</i> , a monoallelic gene in Pitt-Hopkins Syndrome) |
| <i>C7orf33</i>                                                                                     | 148287657-148312952       | Chromosome 7 Open Reading Frame 33                        | -                  | -                         | -                   | 97.83            |                                                                                                                                                                                                                                                                                                                                                                                             |
| <i>CUL1</i>                                                                                        | 148395006-148498128       | Cullin 1                                                  | +                  | -                         | -                   | 4.3              | No reported phenotype association<br>Regulates mammalian G1/S transition by specifically targeting mammalian G1 cell cycle regulators for ubiquitin-dependent degradation <sup>65</sup>                                                                                                                                                                                                     |
| <i>EZH2</i>                                                                                        | 148504475-148581413       | Enhancer of Zeste 2 Polycomb Repressive Complex 2 Subunit | +                  | +                         | +                   | 3.07             | Critical role during normal and perturbed development of hematopoietic and central nervous systems <sup>66</sup> and a member of the Polycomb group, which maintains homeotic repression and is thought to control gene expression by regulating chromatin <sup>18</sup> (In addition to the cerebral malformation phenotype; DGAP259 has a complex chromosome rearrangement.)              |
| <i>PDIA4</i>                                                                                       | 148700154-148725733       | Protein Disulfide Isomerase Family A, Member 4            | -                  | -                         | -                   | 70.97            |                                                                                                                                                                                                                                                                                                                                                                                             |
| <i>ZNF786</i>                                                                                      | 148766735-148787874       | Zinc Finger Protein 786                                   | -                  | -                         | -                   | 92.01            |                                                                                                                                                                                                                                                                                                                                                                                             |
| <i>ZNF425</i>                                                                                      | 148799876-148823438       | Zinc Finger Protein 425                                   | -                  | -                         | -                   | 92.53            |                                                                                                                                                                                                                                                                                                                                                                                             |
| <i>ZNF398</i>                                                                                      | 148823508-148880116       | Zinc Finger Protein 398                                   | -                  | -                         | -                   | 61.58            |                                                                                                                                                                                                                                                                                                                                                                                             |
| <i>ZNF282</i>                                                                                      | 148892577-148923339       | Zinc Finger Protein 282                                   | +                  | -                         | -                   | 64.68            |                                                                                                                                                                                                                                                                                                                                                                                             |
| <i>ZNF212</i>                                                                                      | 148936742-148952700       | Zinc Finger Protein 212                                   | +                  | -                         | -                   | 67.39            |                                                                                                                                                                                                                                                                                                                                                                                             |
| <i>ZNF783</i>                                                                                      | 148959262-148994393       | Zinc Finger Family Member 783                             | -                  | -                         | -                   | 82.83            |                                                                                                                                                                                                                                                                                                                                                                                             |
| <i>ZNF777</i>                                                                                      | 149128454-149158214       | Zinc Finger Protein 777                                   | -                  | -                         | -                   | 52.36            |                                                                                                                                                                                                                                                                                                                                                                                             |
| <i>ZNF746</i>                                                                                      | 149169885-149194908       | Zinc Finger Protein 746                                   | +                  | -                         | -                   | 59.83            |                                                                                                                                                                                                                                                                                                                                                                                             |

DDG2P: Developmental Disorders Genotype-to-Phenotype Database, +: Confirmed DDG2P gene, HI: Haploinsufficiency index (in red if <10%)

Shaded row: Protein coding gene located within the same hESC topologically associated domain (TAD)<sup>25</sup> with the breakpoints

**Table S15. Convergent Genomic Analysis of DGAP259 7q36.3 breakpoints**

| DGAP259: 7q36.3 breakpoints on Rearrangement_A: 155,701,797 and Rearrangement_C: 155,700,873 |                           |                                                                  |                    |                           |                     |                  |                                                                                                                                                                                                                |
|----------------------------------------------------------------------------------------------|---------------------------|------------------------------------------------------------------|--------------------|---------------------------|---------------------|------------------|----------------------------------------------------------------------------------------------------------------------------------------------------------------------------------------------------------------|
| Genes                                                                                        | Nucleotides (GRCh37/hg19) | Description                                                      | OMIM <sup>26</sup> | OMIM Morbid <sup>26</sup> | DDG2P <sup>27</sup> | %HI <sup>8</sup> | Notes                                                                                                                                                                                                          |
| <i>PAXIP1</i>                                                                                | 154735397-154794794       | PAX Interacting (with Transcription-Activation Domain) Protein 1 | +                  | -                         | -                   | 48.56            |                                                                                                                                                                                                                |
| <i>HTR5A</i>                                                                                 | 154862034-154877459       | 5-Hydroxytryptamine (Serotonin) Receptor 5a, G Protein-Coupled   | +                  | -                         | -                   | 59.81            |                                                                                                                                                                                                                |
| <i>INSIG1</i>                                                                                | 155089486-155101945       | Insulin Induced Gene 1                                           | +                  | -                         | -                   | 73.03            |                                                                                                                                                                                                                |
| <i>EN2</i>                                                                                   | 155250824-155257526       | Engrailed Homeobox 2                                             | +                  | -                         | -                   | 23.56            |                                                                                                                                                                                                                |
| <i>CNPY1</i>                                                                                 | 155266901-155326557       | Canopy Fgf Signaling Regulator 1                                 | +                  | -                         | -                   | 63.67            |                                                                                                                                                                                                                |
| <i>RBM33</i>                                                                                 | 155437145-155574179       | Rna Binding Motif Protein 33                                     | -                  | -                         | -                   | 42.71            |                                                                                                                                                                                                                |
| <i>SHH</i>                                                                                   | 155592680-155604967       | Sonic Hedgehog                                                   | +                  | +                         | +                   | 0.66             | Haploinsufficiency (autosomal dominant, monoallelic) associated with Holoprosencephaly type 3 (HPE3), with long range regulation associated phenotype (relevant to cerebral malformation phenotype of DGAP259) |
| <i>RNF32</i>                                                                                 | 156432975-156469824       | Ring Finger Protein 32                                           | +                  | -                         | -                   | 75.12            |                                                                                                                                                                                                                |
| <i>LMBR1</i>                                                                                 | 156461646-156685924       | Limb Development Membrane Protein 1                              | +                  | +                         | -                   | 24.09            |                                                                                                                                                                                                                |
| <i>NOM1</i>                                                                                  | 156742417-156765876       | Nucleolar Protein With Mif4g Domain 1                            | +                  | -                         | -                   | 80.94            |                                                                                                                                                                                                                |
| <i>MNX1</i>                                                                                  | 156786745-156803345       | Motor Neuron And Pancreas Homeobox 1                             | +                  | +                         | +                   | 0.84             | Haploinsufficiency (autosomal dominant, monoallelic) associated with Currarino Syndrome (sacral malformation) <sup>69</sup>                                                                                    |
| <i>UBE3C</i>                                                                                 | 156931607-157062066       | Ubiquitin Protein Ligase E3c                                     | +                  | -                         | -                   | 59.16            |                                                                                                                                                                                                                |
| <i>DNAJB6</i>                                                                                | 157128075-157210133       | Dnaj (Hsp40) Homolog, Subfamily B, Member 6                      | +                  | +                         | -                   | 47.78            |                                                                                                                                                                                                                |
| <i>PTPRN2</i>                                                                                | 157331750-158380480       | Protein Tyrosine Phosphatase, Receptor Type, N Polypeptide 2     | +                  | -                         | -                   | 45.29            |                                                                                                                                                                                                                |
| <i>NCAPG2</i>                                                                                | 158424003-158497520       | Non-SMC Condensin II Complex, Subunit G2                         | +                  | -                         | -                   | 45.05            |                                                                                                                                                                                                                |
| <i>ESYT2</i>                                                                                 | 158523686-158622944       | Extended Synaptotagmin-Like Protein 2                            | -                  | -                         | -                   | 55.86            |                                                                                                                                                                                                                |
| <i>WDR60</i>                                                                                 | 158649269-158749438       | WD Repeat Domain 60                                              | +                  | +                         | +                   | 89.69            |                                                                                                                                                                                                                |
| <i>VIPR2</i>                                                                                 | 158820866-158937649       | Vasoactive Intestinal Peptide Receptor 2                         | +                  | -                         | -                   | 73.84            |                                                                                                                                                                                                                |

DDG2P: Developmental Disorders Genotype-to-Phenotype Database, +: Confirmed DDG2P gene, HI: Haploinsufficiency index (in red if <10%)

Shaded rows: Protein coding genes located within the same hESC topologically associated domain (TAD)<sup>25</sup> with the breakpoints

**Table S16. Convergent Genomic Analysis of DGAP259 9p23 breakpoints**

| DGAP259: 9p23 breakpoints on Rearrangement_F: 9,646,47{5} and Rearrangement_I: 9,646,471 |                           |                                                |                    |                           |                     |                  |                                                                                                                                                                                                                                                                                                                                                                                                                               |
|------------------------------------------------------------------------------------------|---------------------------|------------------------------------------------|--------------------|---------------------------|---------------------|------------------|-------------------------------------------------------------------------------------------------------------------------------------------------------------------------------------------------------------------------------------------------------------------------------------------------------------------------------------------------------------------------------------------------------------------------------|
| Genes                                                                                    | Nucleotides (GRCh37/hg19) | Description                                    | OMIM <sup>26</sup> | OMIM Morbid <sup>26</sup> | DDG2P <sup>27</sup> | %HI <sup>8</sup> | Notes                                                                                                                                                                                                                                                                                                                                                                                                                         |
| <i>TMEM261</i>                                                                           | 7796490-7888380           | Transmembrane Protein 261                      | -                  | -                         | -                   | 87.18            |                                                                                                                                                                                                                                                                                                                                                                                                                               |
| <i>PTPRD</i><br>(Disrupted)                                                              | 8314246-10612723          | Protein Tyrosine Phosphatase, Receptor Type, D | +                  | -                         | -                   | 0.14             | Homozygous microdeletion causes trigonocephaly, hearing loss, and intellectual disability, overlapping phenotypes with the <b>autosomal dominant 9p deletion syndrome</b> <sup>70</sup> (relevant to cerebral malformation phenotype of DGAP259)<br>Role in synaptic plasticity and hippocampal-dependent learning and memory <sup>71</sup> (5q14.3 breakpoints of DGAP259 within same TAD as <i>MEF2C</i> with similar role) |
| <i>TYRP1</i>                                                                             | 12685439-12710290         | Tyrosinase-Related Protein 1                   | +                  | +                         | +                   | 21.84            |                                                                                                                                                                                                                                                                                                                                                                                                                               |

DDG2P: Developmental Disorders Genotype-to-Phenotype Database, +: Confirmed DDG2P gene, HI: Haploinsufficiency index (in red if <10%)

Shaded row: Protein coding gene located within the same hESC topologically associated domain (TAD)<sup>25</sup> with the breakpoints

**Table S17. Convergent Genomic Analysis of DGAP259 18p11.31 breakpoints**

| DGAP259: 18p11.31 breakpoints on Rearrangement_D: 6,375,05{1}, Rearrangement_G: 6,559,611 and Rearrangement_H: 6,375,0{52-48} and 6,559,{598-602} |                           |                                                        |                    |                           |                     |                  |                                                                                                                                                        |
|---------------------------------------------------------------------------------------------------------------------------------------------------|---------------------------|--------------------------------------------------------|--------------------|---------------------------|---------------------|------------------|--------------------------------------------------------------------------------------------------------------------------------------------------------|
| Genes                                                                                                                                             | Nucleotides (GRCh37/hg19) | Description                                            | OMIM <sup>26</sup> | OMIM Morbid <sup>26</sup> | DDG2P <sup>27</sup> | %HI <sup>8</sup> | Notes                                                                                                                                                  |
| <i>DLGAP1</i>                                                                                                                                     | 3496030-4455335           | Discs, Large (Drosophila) Homolog-Associated Protein 1 | +                  | -                         | -                   | 7.58             | Candidate gene for schizophrenia <sup>72</sup>                                                                                                         |
| <i>C18orf42</i>                                                                                                                                   | 5145284-5197502           | Chromosome 18 Open Reading Frame 42                    | -                  | -                         | -                   | 64.35            |                                                                                                                                                        |
| <i>ZBTB14</i>                                                                                                                                     | 5289018-5297052           | Zinc Finger And Btb Domain Containing 14               | +                  | -                         | -                   | 28.98            |                                                                                                                                                        |
| <i>EPB41L3</i>                                                                                                                                    | 5392383-5630699           | Erythrocyte Membrane Protein Band 4.1-Like 3           | +                  | -                         | -                   | 35.28            |                                                                                                                                                        |
| <i>TMEM200C</i>                                                                                                                                   | 5882071-5895954           | Transmembrane Protein 200c                             | -                  | -                         | -                   | 77.42            |                                                                                                                                                        |
| <i>L3MBTL4</i> (Disrupted)                                                                                                                        | 5954705-6415236           | L(3)Mbt-Like 4 (Drosophila)                            | -                  | -                         | -                   | 59.07            | No reported phenotype association                                                                                                                      |
| <i>ARHGAP28</i>                                                                                                                                   | 6729717-6915715           | Rho Gtpase Activating Protein 28                       | +                  | -                         | -                   | 60.37            |                                                                                                                                                        |
| <i>LAMA1</i>                                                                                                                                      | 6941743-7117813           | Laminin, Alpha 1                                       | +                  | -                         | +                   | 60.73            | Biallelic loss of function (autosomal recessive) associated with Poretti-Boltshauser syndrome (cerebellar dysplasia) <sup>73</sup>                     |
| <i>LRRC30</i>                                                                                                                                     | 7231123-7232045           | Leucine Rich Repeat Containing 30                      | -                  | -                         | -                   | 59.77            |                                                                                                                                                        |
| <i>PTPRM</i>                                                                                                                                      | 7566780-8406859           | Protein Tyrosine Phosphatase, Receptor Type, M         | +                  | -                         | -                   | 7.19             | No reported phenotype association (Loss of <i>PTPRM</i> associated with pathogenic development of colorectal adenoma-carcinoma sequence) <sup>74</sup> |
| <i>RAB12</i>                                                                                                                                      | 8609443-8639379           | RAB12, member RAS oncogene family                      | -                  | -                         | -                   | 37.44            |                                                                                                                                                        |

DDG2P: Developmental Disorders Genotype-to-Phenotype Database, +: Confirmed DDG2P gene, HI: Haploinsufficiency index (in red if <10%)

Shaded rows: Protein coding genes located within the same hESC topologically associated domain (TAD)<sup>25</sup> with the breakpoints (blue: 5' breakpoints, red: 3' breakpoints)

**Table S18. Convergent Genomic Analysis of DGAP259 18q21.3 breakpoints**

| DGAP259: 18q21.3 breakpoints on Rearrangement_F: 54,660,13{8} and Rearrangement_I: 54,660,136 |                           |                                                                                                     |                                |                                       |                     |                  |                                                                                                                                                                                                                                                                                                                                                  |
|-----------------------------------------------------------------------------------------------|---------------------------|-----------------------------------------------------------------------------------------------------|--------------------------------|---------------------------------------|---------------------|------------------|--------------------------------------------------------------------------------------------------------------------------------------------------------------------------------------------------------------------------------------------------------------------------------------------------------------------------------------------------|
| Genes                                                                                         | Nucleotides (GRCh37/hg19) | Description                                                                                         | OMIM <sub>6</sub> <sup>2</sup> | OMIM Morbid <sub>6</sub> <sup>2</sup> | DDG2P <sup>27</sup> | %HI <sup>8</sup> | Notes                                                                                                                                                                                                                                                                                                                                            |
| CCDC68                                                                                        | 52568740-52626739         | Coiled-Coil Domain Containing 68                                                                    | -                              | -                                     | -                   | 59.77            |                                                                                                                                                                                                                                                                                                                                                  |
| TCF4                                                                                          | 52889562-53332018         | Transcription Factor 4                                                                              | +                              | +                                     | +                   | 0.38             | Haploinsufficiency (autosomal dominant, monoallelic associated with Pitt-Hopkins Syndrome (severe epileptic encephalopathy with mental retardation) <sup>75</sup> (relevant to cerebellar malformation phenotype of DGAP259) (7q35 breakpoints of DGAP259 disrupt <i>CNTNAP2</i> , a gene related with Pitt-Hopkins like Syndrome) <sup>64</sup> |
| TXNL1                                                                                         | 54264439-54318831         | Thioredoxin-Like 1                                                                                  | +                              | -                                     | -                   | 5.48             | No reported phenotype association                                                                                                                                                                                                                                                                                                                |
| WDR7 (Disrupted)                                                                              | 54318574-54698828         | Wd Repeat Domain 7                                                                                  | +                              | -                                     | -                   | 14.85            | No reported phenotype association<br>Localized to synaptic vesicles in rat and mouse brain <sup>76</sup>                                                                                                                                                                                                                                         |
| BOD1L2                                                                                        | 54814293-54817531         | Biorientation of Chromosomes In Cell Division 1-Like 2                                              | -                              | -                                     | -                   | 87.92            |                                                                                                                                                                                                                                                                                                                                                  |
| ST8SIA3                                                                                       | 55018044-55038962         | ST8 Alpha-N-Acetyl-Neuraminide Alpha-2,8-Sialyltransferase 3                                        | +                              | -                                     | -                   | 11.2             |                                                                                                                                                                                                                                                                                                                                                  |
| ONECUT2                                                                                       | 55102917-55158529         | One Cut Homeobox 2                                                                                  | +                              | -                                     | -                   | 12.99            |                                                                                                                                                                                                                                                                                                                                                  |
| FECH                                                                                          | 55215515-55254004         | Ferrochelatase                                                                                      | +                              | -                                     | -                   | 28.28            |                                                                                                                                                                                                                                                                                                                                                  |
| NARS                                                                                          | 55267888-55289445         | Asparaginyl-tRNA Synthetase                                                                         | +                              | -                                     | -                   | 21.6             |                                                                                                                                                                                                                                                                                                                                                  |
| ATP8B1                                                                                        | 55313658-55470333         | ATPase, Aminophospholipid Transporter, Class I, Type 8B, Member 1                                   | +                              | +                                     | +                   | 41.4             | Biallelic loss of function (autosomal recessive) is associated with <i>ATP8B1</i> -related intrahepatic cholestasis <sup>77</sup>                                                                                                                                                                                                                |
| NEED4L                                                                                        | 55711599-56068772         | Neural Precursor Cell Expressed, Developmentally Down-Regulated 4-Like, E3 Ubiquitin Protein Ligase | +                              | -                                     | -                   | 8.66             | Regulator of renal sodium channels and involved in induction of mesoendodermal fates in mouse embryonic stem cells <sup>78</sup> (renal agenesis and multicystic kidney in DGAP259)                                                                                                                                                              |
| ALPK2                                                                                         | 56148479-56296189         | Alpha-Kinase 2                                                                                      | -                              | -                                     | -                   | 88.74            |                                                                                                                                                                                                                                                                                                                                                  |

DDG2P: Developmental Disorders Genotype-to-Phenotype Database, +: Confirmed DDG2P gene, HI: Haploinsufficiency index (in red if <10%)

Shaded rows: Protein coding genes located within the same hESC topologically associated domain (TAD)<sup>25</sup> with the breakpoints

**Table S19. Convergent Genomic Analysis of DGAP268 10p12.31 breakpoints**

| DGAP268: 10p12.31 breakpoints on Rearrangement_B: 21,606,655 and Rearrangement_C: 21,606,63{4-2} |                           |                                                                                                 |                    |                           |                     |                  |                                                                                                                                                                                                                                   |
|--------------------------------------------------------------------------------------------------|---------------------------|-------------------------------------------------------------------------------------------------|--------------------|---------------------------|---------------------|------------------|-----------------------------------------------------------------------------------------------------------------------------------------------------------------------------------------------------------------------------------|
| Genes                                                                                            | Nucleotides (GRCh37/hg19) | Description                                                                                     | OMIM <sup>26</sup> | OMIM Morbid <sup>26</sup> | DDG2P <sup>27</sup> | %HI <sup>8</sup> | Notes                                                                                                                                                                                                                             |
| <i>NEBL</i>                                                                                      | 21068902-21463116         | Nebulette                                                                                       | +                  | -                         | -                   | 21.79            |                                                                                                                                                                                                                                   |
| <i>C10orf113</i>                                                                                 | 21414692-21435488         | Chromosome 10 Open Reading Frame 113                                                            | -                  | -                         | -                   | 86.51            |                                                                                                                                                                                                                                   |
| <i>CASC10</i>                                                                                    | 21781587-21786191         | Cancer Susceptibility Candidate 10                                                              | -                  | -                         | -                   | 83.87            |                                                                                                                                                                                                                                   |
| <i>SKIDA1</i>                                                                                    | 21802407-21814611         | SKI/DACH Domain Containing 1                                                                    | -                  | -                         | -                   | 18.69            |                                                                                                                                                                                                                                   |
| <i>MLLT10</i>                                                                                    | 21823094-22032559         | Myeloid/Lymphoid Or Mixed-Lineage Leukemia (Trithorax Homolog, Drosophila); Translocated To, 10 | +                  | -                         | -                   | 9.19             | No reported phenotype association Fused with <i>AF10</i> in rare but recurrent chromosome rearrangement of acute monoblastic leukemia (inv ins(10;11)(p12;q23q12)) <sup>79</sup>                                                  |
| <i>DNAJC1</i>                                                                                    | 22045466-22292698         | Dnaj (Hsp40) Homolog, Subfamily C, Member 1                                                     | +                  | -                         | -                   | 38.97            |                                                                                                                                                                                                                                   |
| <i>EBLN1</i>                                                                                     | 22497743-22498950         | Endogenous Bornavirus-Like Nucleoprotein 1                                                      | +                  | -                         | -                   | 90.27            |                                                                                                                                                                                                                                   |
| <i>COMMD3</i>                                                                                    | 22604903-22609235         | COMM Domain Containing 3                                                                        | -                  | -                         | -                   | 18.42            |                                                                                                                                                                                                                                   |
| <i>BMI1</i>                                                                                      | 22610140-22620413         | BMI1 Proto-Oncogene, Polycomb Ring Finger                                                       | +                  | -                         | -                   | 1.63             | No reported phenotype association, strongly expressed in proliferating cerebellar precursor cells in mice and humans <sup>80</sup> Important paralog of <i>PCGF5</i> (located in the vicinity of 10q23.32 breakpoints of DGAP268) |
| <i>SPAG6</i>                                                                                     | 22634399-22743153         | Sperm Associated Antigen 6                                                                      | +                  | -                         | -                   | 43.84            |                                                                                                                                                                                                                                   |
| <i>PIP4K2A</i>                                                                                   | 22823778-23003484         | Phosphatidylinositol-5-Phosphate 4-Kinase, Type II, Alpha                                       | +                  | -                         | -                   | 20.5             |                                                                                                                                                                                                                                   |
| <i>ARMC3</i>                                                                                     | 23216953-23326518         | Armadillo Repeat Containing 3                                                                   | +                  | -                         | -                   | 66.75            |                                                                                                                                                                                                                                   |

DDG2P: Developmental Disorders Genotype-to-Phenotype Database, +: Confirmed DDG2P gene, HI: Haploinsufficiency index (in red if <10%)

Shaded rows: Protein coding genes located within the same hESC topologically associated domain (TAD)<sup>25</sup> with the breakpoints



**Table S20. Convergent Genomic Analysis of DGAP268 10p12.2 breakpoints**

| DGAP268: 10p12.2 breakpoints on Rearrangement_A: 23,659,495~ and Rearrangement_C: 23,659,20{0-2} |                           |                                            |                    |                           |                     |                  |                                                                                                                   |
|--------------------------------------------------------------------------------------------------|---------------------------|--------------------------------------------|--------------------|---------------------------|---------------------|------------------|-------------------------------------------------------------------------------------------------------------------|
| Genes                                                                                            | Nucleotides (GRCh37/hg19) | Description                                | OMIM <sup>26</sup> | OMIM Morbid <sup>26</sup> | DDG2P <sup>27</sup> | %HI <sup>8</sup> | Notes                                                                                                             |
| <i>MSRB2</i>                                                                                     | 23384435-23410942         | Methionine Sulfoxide Reductase B2          | +                  | -                         | -                   | 79.51            |                                                                                                                   |
| <i>PTF1A</i>                                                                                     | 23481256-23483181         | Pancreas Specific Transcription Factor, 1a | +                  | +                         | +                   | 27.41            | Biallelic loss of function (autosomal recessive) associated with Pancreatic and Cerebellar Agenesis <sup>81</sup> |
| <i>C10orf67</i>                                                                                  | 23556124-23633774         | Chromosome 10 Open Reading Frame 67        | -                  | -                         | -                   | 90.14            |                                                                                                                   |
| <i>OTUD1</i>                                                                                     | 23728198-23731308         | OTU Deubiquitinase 1                       | +                  | -                         | -                   | 75.7             |                                                                                                                   |
| <i>KIAA1217</i>                                                                                  | 23983675-24836772         | Kiaa1217                                   | -                  | -                         | -                   | 41.11            |                                                                                                                   |
| <i>ARHGAP21</i>                                                                                  | 24872538-25012597         | Rho Gtpase Activating Protein 21           | +                  | -                         | -                   | 56.74            |                                                                                                                   |

DDG2P: Developmental Disorders Genotype-to-Phenotype Database, +: Confirmed DDG2P gene, HI: Haploinsufficiency index (in red if <10%)

Shaded rows: Protein coding genes located within the same hESC topologically associated domain (TAD)<sup>25</sup> with the breakpoints

**Table S21. Convergent Genomic Analysis of DGAP268 10q23.32 breakpoints**

| DGAP268: 10q23.32 breakpoints on Rearrangement_A: 93,983,897~ and Rearrangement_B: 93,982,408 |                           |                                                                           |                    |                           |                     |                  |                                                                                                                                                                      |
|-----------------------------------------------------------------------------------------------|---------------------------|---------------------------------------------------------------------------|--------------------|---------------------------|---------------------|------------------|----------------------------------------------------------------------------------------------------------------------------------------------------------------------|
| Genes                                                                                         | Nucleotides (GRCh37/hg19) | Description                                                               | OMIM <sup>26</sup> | OMIM Morbid <sup>26</sup> | DDG2P <sup>27</sup> | %HI <sup>8</sup> | Notes                                                                                                                                                                |
| <i>RPP30</i>                                                                                  | 92631473-92668312         | Ribonuclease P/MRP 30 kda Subunit                                         | +                  | -                         | -                   | 26.31            |                                                                                                                                                                      |
| <i>ANKRD1</i>                                                                                 | 92671853-92681033         | Ankyrin Repeat Domain 1 (Cardiac Muscle)                                  | +                  | +                         | -                   | 22.32            |                                                                                                                                                                      |
| <i>PCGF5</i>                                                                                  | 92979908-93044088         | Polycomb Group Ring Finger 5                                              | -                  | -                         | -                   | 8.55             | No reported phenotype association<br>Important paralog of <a href="#">BMI1</a> (located in the vicinity of 10p12.31 breakpoints of DGAP268)                          |
| <i>HECTD2</i>                                                                                 | 93170096-93274586         | HECT Domain Containing E3 Ubiquitin Protein Ligase 2                      | -                  | -                         | -                   | 16.83            |                                                                                                                                                                      |
| <i>PPP1R3C</i>                                                                                | 93388199-93392811         | Protein Phosphatase 1, Regulatory Subunit 3C                              | +                  | -                         | -                   | 39.43            |                                                                                                                                                                      |
| <i>TNKS2</i>                                                                                  | 93558069-93625033         | Tankyrase, TRF1-Interacting Ankyrin-Related ADP-Ribose Polymerase 2       | +                  | -                         | -                   | 11.01            |                                                                                                                                                                      |
| <i>FGFBP3</i>                                                                                 | 93666346-93669240         | Fibroblast Growth Factor Binding Protein 3                                | -                  | -                         | -                   | 84.27            |                                                                                                                                                                      |
| <i>BTAF1</i>                                                                                  | 93683526-93790082         | BTAF1 RNA Polymerase II, B-TFIID Transcription Factor-Associated, 170 kda | +                  | -                         | -                   | 5                | No reported phenotype association                                                                                                                                    |
| <i>CPEB3</i> (Disrupted)                                                                      | 93806449-94050844         | Cytoplasmic Polyadenylation Element Binding Protein 3                     | +                  | -                         | -                   | 12.96            | No reported phenotype association                                                                                                                                    |
| <i>MARCH5</i>                                                                                 | 94050920-94113721         | Membrane-Associated Ring Finger (C3HC4) 5                                 | +                  | -                         | -                   | 7.01             | No reported phenotype association                                                                                                                                    |
| <i>IDE</i>                                                                                    | 94211441-94333833         | Insulin-Degrading Enzyme                                                  | +                  | -                         | -                   | 1.37             | No reported phenotype association                                                                                                                                    |
| <i>KIF11</i>                                                                                  | 94353043-94415150         | Kinesin Family Member 11                                                  | +                  | +                         | +                   | 9.02             | Haploinsufficiency (autosomal dominant, monoallelic) associated with microcephaly with or without chorioretinopathy, lymphedema, or mental retardation <sup>82</sup> |
| <i>HHEX</i>                                                                                   | 94447945-94455403         | Hematopoietically Expressed Homeobox                                      | +                  | -                         | -                   | 7.77             | No reported phenotype association                                                                                                                                    |
| <i>EXOC6</i>                                                                                  | 94590935-94819250         | Exocyst Complex Component 6                                               | +                  | -                         | -                   | 7.76             | No reported phenotype association                                                                                                                                    |
| <i>CYP26C1</i>                                                                                | 94821021-94828454         | Cytochrome P450, Family 26, Subfamily C, Polypeptide 1                    | +                  | +                         | -                   | 38.94            | Biallelic loss of function (autosomal recessive) associated with Focal facial dermal dysplasia, type IV <sup>83</sup>                                                |
| <i>CYP26A1</i>                                                                                | 94833232-94837647         | Cytochrome P450, Family 26, Subfamily A, Polypeptide 1                    | +                  | -                         | -                   | 9.92             | No reported phenotype association                                                                                                                                    |
| <i>MYOF</i>                                                                                   | 95066186-95242074         | Myoferlin                                                                 | +                  | -                         | -                   | 23.07            |                                                                                                                                                                      |
| <i>CEP55</i>                                                                                  | 95256389-95288849         | Centrosomal Protein 55 kda                                                | +                  | -                         | -                   | 30.24            |                                                                                                                                                                      |

DDG2P: Developmental Disorders Genotype-to-Phenotype Database, +: Confirmed DDG2P gene, HI: Haploinsufficiency index (in red if <10%)  
Shaded rows: Protein coding genes located within the same hESC topologically associated domain (TAD)<sup>25</sup> with the breakpoints

**Table S22. Convergent Genomic Analysis of DGAP285 Xp11.21 breakpoints**

| DGAP285: Xp11.21 breakpoints on Rearrangement_A: 55,174,723~ and Rearrangement_B: 55,174,381~ |                           |                                                  |                    |                           |                     |                  |                                   |
|-----------------------------------------------------------------------------------------------|---------------------------|--------------------------------------------------|--------------------|---------------------------|---------------------|------------------|-----------------------------------|
| Genes                                                                                         | Nucleotides (GRCh37/hg19) | Description                                      | OMIM <sup>26</sup> | OMIM Morbid <sup>26</sup> | DDG2P <sup>27</sup> | %HI <sup>8</sup> | Notes                             |
| <i>PAGE2B</i>                                                                                 | 55101496-55105342         | P Antigen Family, Member 2B                      | -                  | -                         | -                   | 96.76            |                                   |
| <i>PAGE2</i>                                                                                  | 55115441-55119275         | P Antigen Family, Member 2 (Prostate Associated) | +                  | -                         | -                   | 96.53            |                                   |
| <i>FAM104B</i> (Disrupted)                                                                    | 55169535-55187743         | Family With Sequence Similarity 104, Member B    | -                  | -                         | -                   | 93.08            | No reported phenotype association |
| <i>MTRNR2L10</i>                                                                              | 55207824-55208944         | MT-RNR2-Like 10                                  | -                  | -                         | -                   | 89.08            |                                   |
| <i>PAGE5</i>                                                                                  | 55246788-55250541         | P Antigen Family, Member 5 (Prostate Associated) | -                  | -                         | -                   | 96.87            |                                   |
| <i>PAGE3</i>                                                                                  | 55284848-55291279         | P Antigen Family, Member 3 (Prostate Associated) | +                  | -                         | -                   | 96.96            |                                   |
| <i>MAGEH1</i>                                                                                 | 55478538-55479998         | Melanoma Antigen Family H1                       | +                  | -                         | -                   | 77.09            |                                   |
| <i>USP51</i>                                                                                  | 55511049-55515635         | Ubiquitin Specific Peptidase 51                  | -                  | -                         | -                   | 73.85            |                                   |
| <i>FOXR2</i>                                                                                  | 55649833-55652621         | Forkhead Box R2                                  | +                  | -                         | -                   | 90.12            |                                   |
| <i>RRAGB</i>                                                                                  | 55744172-55785207         | Ras-Related GTP Binding B                        | +                  | -                         | -                   | 34.1             |                                   |
| <i>KLF8</i>                                                                                   | 56258854-56314322         | Kruppel-Like Factor 8                            | +                  | -                         | -                   | 60.52            |                                   |

DDG2P: Developmental Disorders Genotype-to-Phenotype Database, +: Confirmed DDG2P gene, HI: Haploinsufficiency index (in red if <10%)

Shaded rows: Protein coding genes located within the same hESC topologically associated domain (TAD)<sup>25</sup> with the breakpoints

**Table S23. Convergent Genomic Analysis of DGAP285 Xq28 breakpoints**

| DGAP285: Xq28 breakpoints on Rearrangement_A: 150,286,207~ and Rearrangement_B: 150,284,569~ |                           |                                                                        |                    |                           |                     |                  |                                                                                                                                                  |
|----------------------------------------------------------------------------------------------|---------------------------|------------------------------------------------------------------------|--------------------|---------------------------|---------------------|------------------|--------------------------------------------------------------------------------------------------------------------------------------------------|
| Genes                                                                                        | Nucleotides (GRCh37/hg19) | Description                                                            | OMIM <sup>26</sup> | OMIM Morbid <sup>26</sup> | DDG2P <sup>27</sup> | %HI <sup>8</sup> | Notes                                                                                                                                            |
| <i>IDS</i>                                                                                   | 148558521-148615470       | Iduronate 2-Sulfatase                                                  | +                  | +                         | +                   | 14.02            | Hemizygous loss of function (X-linked recessive) associated with Mucopolysaccharidosis II <sup>84</sup>                                          |
| <i>CXorf40A</i>                                                                              | 148621900-148632055       | Chromosome X Open Reading Frame 40A                                    | +                  | -                         | -                   | 86.75            | No reported phenotype association                                                                                                                |
| <i>MAGEA9B</i>                                                                               | 148663308-148669116       | Melanoma Antigen Family A9B                                            | +                  | -                         | -                   | 99.76            | No reported phenotype association                                                                                                                |
| <i>MAGEA9</i>                                                                                | 148663309-148669116       | Melanoma Antigen Family A9                                             | +                  | -                         | -                   | 96.82            | No reported phenotype association                                                                                                                |
| <i>TMEM185A</i>                                                                              | 148678216-148713568       | Transmembrane Protein 185A                                             | +                  | -                         | -                   | 38.34            | No reported phenotype association                                                                                                                |
| <i>MAGEA11</i>                                                                               | 148769894-148798926       | Melanoma Antigen Family A11                                            | +                  | -                         | -                   | 95.69            | No reported phenotype association                                                                                                                |
| <i>HSFX2</i>                                                                                 | 148855725-148858528       | Heat Shock Transcription Factor Family, X Linked 2                     | -                  | -                         | -                   | 99.69            |                                                                                                                                                  |
| <i>HSFX1</i>                                                                                 | 148855726-148858525       | Heat Shock Transcription Factor Family, X Linked 1                     | -                  | -                         | -                   | 99.26            |                                                                                                                                                  |
| <i>MAGEA8</i>                                                                                | 149009941-149014609       | Melanoma Antigen Family A8                                             | +                  | -                         | -                   | 96               | No reported phenotype association                                                                                                                |
| <i>CXorf40B</i>                                                                              | 149097745-149107029       | Chromosome X Open Reading Frame 40B                                    | -                  | -                         | -                   | 86.08            |                                                                                                                                                  |
| <i>MAMLD1</i>                                                                                | 149529689-149682448       | Mastermind-Like Domain Containing 1                                    | +                  | +                         | <b>P</b>            | 71.77            | Hemizygous loss of function (X-linked recessive) associated with X-linked hypospadias, type II <sup>85</sup>                                     |
| <i>MTM1</i>                                                                                  | 149737069-149841795       | Myotubularin 1                                                         | +                  | +                         | +                   | 12.54            | Hemizygous loss of function (X-linked recessive) associated with X-linked myotubular myopathy <sup>86</sup> (overlapping phenotype with DGAP285) |
| <i>MTMR1</i>                                                                                 | 149861435-149933576       | Myotubularin Related Protein 1                                         | +                  | -                         | -                   | 31.42            |                                                                                                                                                  |
| <i>CD99L2</i>                                                                                | 149934810-150067289       | CD99 Molecule-Like 2                                                   | +                  | -                         | -                   | 82.42            | No reported phenotype association                                                                                                                |
| <i>HMGB3</i>                                                                                 | 150148982-150159248       | High Mobility Group Box 3                                              | +                  | +                         | -                   | 36.49            | Hemizygous loss of function (X-linked recessive) associated with syndromic microphthalmia, 13 <sup>87</sup>                                      |
| <i>GPR50</i>                                                                                 | 150345125-150349937       | G Protein-Coupled Receptor 50                                          | +                  | -                         | -                   | 81.88            | No reported phenotype association                                                                                                                |
| <i>VMA21</i>                                                                                 | 150564987-150577836       | VMA21 Vacuolar H <sup>+</sup> -Atpase Homolog ( <i>S. Cerevisiae</i> ) | +                  | +                         | -                   | 51.64            | Hemizygous loss of function (X-linked recessive) associated with X-linked myopathy with excessive autophagy <sup>88</sup>                        |
| <i>PASD1</i>                                                                                 | 150732094-150845211       | PAS Domain Containing 1                                                | -                  | -                         | -                   | 99.84            |                                                                                                                                                  |
| <i>PRRG3</i>                                                                                 | 150863596-150874396       | Proline Rich Gla (G-Carboxyglutamic Acid) 3 (Transmembrane)            | +                  | -                         | -                   | 58.49            | No reported phenotype association                                                                                                                |
| <i>FATE1</i>                                                                                 | 150884507-150891666       | Fetal And Adult Testis Expressed 1                                     | +                  | -                         | -                   | 95.68            | No reported phenotype association                                                                                                                |

DDG2P: Developmental Disorders Genotype-to-Phenotype Database, +: Confirmed DDG2P gene, P: Probable DDG2P gene, HI: Haploinsufficiency index (in red if <10%)  
 Shaded rows: Protein coding genes located within the neighboring hESC topologically associated domains (TAD)<sup>25</sup> and the topological boundary regions (TBR) around the breakpoints

**Table S24. Convergent Genomic Analysis of DGAP288 6q21 breakpoints**

| DGAP288: 6q21 breakpoints on Rearrangement_A: 112,976,04{2-4}and Rearrangement_B: 112,976,031 |                           |                                                       |                    |                           |                     |                  |                                                                                                                                      |
|-----------------------------------------------------------------------------------------------|---------------------------|-------------------------------------------------------|--------------------|---------------------------|---------------------|------------------|--------------------------------------------------------------------------------------------------------------------------------------|
| Genes                                                                                         | Nucleotides (GRCh37/hg19) | Description                                           | OMIM <sup>26</sup> | OMIM Morbid <sup>26</sup> | DDG2P <sup>27</sup> | %HI <sup>8</sup> | Notes                                                                                                                                |
| <i>WISP3</i>                                                                                  | 112375275-112392171       | WNT1 Inducible Signaling Pathway Protein 3            | +                  | +                         | -                   | 48.76            | Biallelic loss of function (autosomal recessive) associated with progressive pseudorheumatoid arthropathy of childhood <sup>89</sup> |
| <i>TUBE1</i>                                                                                  | 112391980-112408732       | Tubulin, Epsilon 1                                    | +                  | -                         | -                   | 14.86            |                                                                                                                                      |
| <i>FAM229B</i>                                                                                | 112408802-112423993       | Family With Sequence Similarity 229, Member B         | -                  | -                         | -                   | 19.09            |                                                                                                                                      |
| <i>LAMA4</i>                                                                                  | 112429963-112576141       | Laminin, Alpha 4                                      | +                  | -                         | -                   | 35.21            |                                                                                                                                      |
| <i>RFPL4B</i>                                                                                 | 112668532-112672498       | Ret Finger Protein-Like 4B                            | -                  | -                         | -                   | 99.43            |                                                                                                                                      |
| <i>MARCKS</i>                                                                                 | 114178541-114184648       | Myristoylated Alanine-Rich Protein Kinase C Substrate | +                  | -                         | -                   | 64.72            |                                                                                                                                      |

DDG2P: Developmental Disorders Genotype-to-Phenotype Database, +: Confirmed DDG2P gene, HI: Haploinsufficiency index (in red if <10%)

Shaded rows: Protein coding genes located within the same hESC topologically associated domain (TAD)<sup>25</sup> with the breakpoints

**Table S25. Convergent Genomic Analysis of DGAP288 17q24.3 breakpoints**

| DGAP288: 17q24.3 breakpoints on Rearrangement_A: 69,728,01{7-9} and Rearrangement_B: 69,728,006 |                           |                                      |                    |                           |                     |                  |                                                                                                                                                                                                                                                                                         |
|-------------------------------------------------------------------------------------------------|---------------------------|--------------------------------------|--------------------|---------------------------|---------------------|------------------|-----------------------------------------------------------------------------------------------------------------------------------------------------------------------------------------------------------------------------------------------------------------------------------------|
| Gene                                                                                            | Nucleotides (GRCh37/hg19) | Description                          | OMIM <sup>26</sup> | OMIM Morbid <sup>26</sup> | DDG2P <sup>27</sup> | %HI <sup>8</sup> | Notes                                                                                                                                                                                                                                                                                   |
| SOX9                                                                                            | 70117161-70122561         | SRY (sex determining region Y)-box 9 | +                  | +                         | +                   | 0.56             | Haploinsufficiency (autosomal dominant, monoallelic) associated with Campomelic dysplasia <sup>90</sup><br>Haploinsufficient (autosomal dominant, monoallelic) long-range cis-regulation associated with <b>Pierre-Robin Sequence<sup>22</sup></b> (overlapping phenotype with DGAP288) |

DDG2P: Developmental Disorders Genotype-to-Phenotype Database, +: Confirmed DDG2P gene, HI: Haploinsufficiency index (in red if <10%)

Shaded row: SOX9 is the only protein coding gene located within the same hESC topologically associated domain (TAD)<sup>25</sup> with the breakpoints

**Table S26. Convergent Genomic Analysis of DGAP290 2q32.3 breakpoints**

| DGAP290: 2q32.3 breakpoints on Rearrangement_A: 197,164,194 and Rearrangement_B: 197,164,206 |                           |                                                                 |                    |                           |                     |                  |                                                                                                                |
|----------------------------------------------------------------------------------------------|---------------------------|-----------------------------------------------------------------|--------------------|---------------------------|---------------------|------------------|----------------------------------------------------------------------------------------------------------------|
| Genes                                                                                        | Nucleotides (GRCh37/hg19) | Description                                                     | OMIM <sup>26</sup> | OMIM Morbid <sup>26</sup> | DDG2P <sup>27</sup> | %HI <sup>8</sup> | Notes                                                                                                          |
| <i>SLC39A10</i>                                                                              | 196440701-196602426       | Solute Carrier Family 39 (Zinc Transporter), Member 10          | +                  | -                         | -                   | 36.25            |                                                                                                                |
| <i>DNAH7</i>                                                                                 | 196602427-196933536       | Dynein, Axonemal, Heavy Chain 7                                 | +                  | -                         | -                   | 48.83            |                                                                                                                |
| <i>STK17B</i>                                                                                | 196998290-197041227       | Serine/Threonine Kinase 17b                                     | +                  | -                         | -                   | 37.72            |                                                                                                                |
| <i>HECW2</i> (Disrupted)                                                                     | 197059094-197458416       | HECT, C2 And WW Domain Containing E3 Ubiquitin Protein Ligase 2 | -                  | -                         | -                   | 18.5             | No reported phenotype association                                                                              |
| <i>CCDC150</i>                                                                               | 197504278-197628214       | Coiled-Coil Domain Containing 150                               | -                  | -                         | -                   | 62.11            |                                                                                                                |
| <i>GTF3C3</i>                                                                                | 197627756-197664449       | General Transcription Factor IIIC, Polypeptide 3, 102 kda       | +                  | -                         | -                   | 30.03            |                                                                                                                |
| <i>C2orf66</i>                                                                               | 197669726-197675000       | Chromosome 2 Open Reading Frame 66                              | -                  | -                         | -                   | 77.88            |                                                                                                                |
| <i>PGAP1</i>                                                                                 | 197697728-197792520       | Post-GPI Attachment To Proteins 1                               | +                  | +                         | -                   | 32.33            | Biallelic loss of function (autosomal recessive) associated with mental retardation, type 42 <sup>91</sup>     |
| <i>ANKRD44</i>                                                                               | 197831741-198175897       | Ankyrin Repeat Domain 44                                        | -                  | -                         | -                   | 28.93            |                                                                                                                |
| <i>SF3B1</i>                                                                                 | 198254508-198299815       | Splicing Factor 3b, Subunit 1, 155 kda                          | +                  | -                         | -                   | 4.28             | No reported phenotype association                                                                              |
| <i>COQ10B</i>                                                                                | 198318147-198340032       | Coenzyme Q10B                                                   | -                  | -                         | -                   | 38.85            |                                                                                                                |
| <i>HSPD1</i>                                                                                 | 198351305-198381461       | Heat Shock 60 kda Protein 1 (Chaperonin)                        | +                  | +                         | +                   | 2.85             | Haploinsufficiency (autosomal dominant, monoallelic) associated with spastic paraplegia, type 13 <sup>92</sup> |
| <i>HSPE1</i>                                                                                 | 198364718-198368181       | Heat Shock 10 kda Protein 1                                     | +                  | -                         | -                   | 9.58             |                                                                                                                |
| <i>MOB4</i>                                                                                  | 198380295-198418423       | MOB Family Member 4, Phocein                                    | +                  | -                         | -                   | 4.45             |                                                                                                                |
| <i>RFTN2</i>                                                                                 | 198432948-198540769       | Raftlin Family Member 2                                         | -                  | -                         | -                   | 66.28            |                                                                                                                |
| <i>MARS2</i>                                                                                 | 198570087-198573113       | Methionyl-Trna Synthetase 2, Mitochondrial                      | +                  | +                         | -                   | 47.49            | Biallelic loss of function (autosomal recessive) associated with Spastic ataxia, type 3 <sup>93</sup>          |
| <i>BOLL</i>                                                                                  | 198591603-198651486       | Boule-Like RNA-Binding Protein                                  | +                  | -                         | -                   | 18.25            |                                                                                                                |

DDG2P: Developmental Disorders Genotype-to-Phenotype Database, +: Confirmed DDG2P gene, HI: Haploinsufficiency index (in red if <10%)

Shaded rows: Protein coding genes located within the same hESC topologically associated domain (TAD)<sup>25</sup> with the breakpoints



**Table S27. Convergent Genomic Analysis of DGAP290 7q33 breakpoints**

| DGAP290: 7q33 breakpoints on Rearrangement_A: 135,905,923, Rearrangement_B: 135,299,810, and Rearrangement_C: 135,299,81{2} and 135,905,92{4} |                           |                                                               |                    |                           |                     |                  |                                                                                                                                            |
|-----------------------------------------------------------------------------------------------------------------------------------------------|---------------------------|---------------------------------------------------------------|--------------------|---------------------------|---------------------|------------------|--------------------------------------------------------------------------------------------------------------------------------------------|
| Genes                                                                                                                                         | Nucleotides (GRCh37/hg19) | Description                                                   | OMIM <sup>26</sup> | OMIM Morbid <sup>26</sup> | DDG2P <sup>27</sup> | %HI <sup>8</sup> | Notes                                                                                                                                      |
| <i>BPGM</i>                                                                                                                                   | 134331560-134364565       | 2,3-Bisphosphoglycerate Mutase                                | +                  | +                         | -                   | 22.09            | Biallelic loss of function (autosomal recessive) associated with erythrocytosis due to bisphosphoglycerate mutase deficiency <sup>94</sup> |
| <i>CALD1</i>                                                                                                                                  | 134429003-134655479       | Caldesmon 1                                                   | +                  | -                         | -                   | 20.29            |                                                                                                                                            |
| <i>AGBL3</i>                                                                                                                                  | 134671259-134832715       | ATP/GTP Binding Protein-Like 3                                | -                  | -                         | -                   | 64.12            |                                                                                                                                            |
| <i>C7orf49</i>                                                                                                                                | 134777115-134855547       | Chromosome 7 Open Reading Frame 49                            | -                  | -                         | -                   | 80.37            |                                                                                                                                            |
| <i>TMEM140</i>                                                                                                                                | 134832824-134850967       | Transmembrane Protein 140                                     | -                  | -                         | -                   | 83.19            |                                                                                                                                            |
| <i>WDR91</i>                                                                                                                                  | 134868590-134896316       | WD Repeat Domain 91                                           | -                  | -                         | -                   | 46.24            |                                                                                                                                            |
| <i>STRA8</i>                                                                                                                                  | 134916731-134943244       | Stimulated By Retinoic Acid 8                                 | +                  | -                         | -                   | 56.99            |                                                                                                                                            |
| <i>CNOT4</i>                                                                                                                                  | 135046547-135194875       | CCR4-NOT Transcription Complex, Subunit 4                     | +                  | -                         | -                   | 6.19             | No reported phenotype association                                                                                                          |
| <i>NUP205</i> (Disrupted)                                                                                                                     | 135242667-135333505       | Nucleoporin 205 kda                                           | +                  | -                         | -                   | 11.41            | No reported phenotype association                                                                                                          |
| <i>C7orf73</i>                                                                                                                                | 135347244-135378166       | Chromosome 7 Open Reading Frame 73                            | -                  | -                         | -                   | 24.72            |                                                                                                                                            |
| <i>SLC13A4</i>                                                                                                                                | 135365985-135414006       | Solute Carrier Family 13 (Sodium/Sulfate Symporter), Member 4 | +                  | -                         | -                   | 40.17            |                                                                                                                                            |
| <i>FAM180A</i>                                                                                                                                | 135413096-135433594       | Family With Sequence Similarity 180, Member A                 | -                  | -                         | -                   | 63.78            |                                                                                                                                            |
| <i>MTPN</i>                                                                                                                                   | 135611509-135662101       | Myotrophin                                                    | +                  | -                         | -                   | 15.72            |                                                                                                                                            |
| <i>LUZP6</i>                                                                                                                                  | 135612022-135612198       | Leucine Zipper Protein 6                                      | +                  | -                         | -                   | 86.19            |                                                                                                                                            |
| <i>CHRM2</i>                                                                                                                                  | 136553416-136705002       | Cholinergic Receptor, Muscarinic 2                            | +                  | +                         | -                   | 11.59            | A SNP variation may predispose to alcohol dependence, drug dependence, and affective disorders <sup>95</sup>                               |
| <i>PTN</i>                                                                                                                                    | 136912088-137028611       | Pleiotrophin                                                  | +                  | -                         | -                   | 5.33             | No reported phenotype association                                                                                                          |
| <i>DGKI</i>                                                                                                                                   | 137065783-137531838       | Diacylglycerol Kinase, Iota                                   | +                  | -                         | -                   | 12.1             |                                                                                                                                            |

DDG2P: Developmental Disorders Genotype-to-Phenotype Database, +: Confirmed DDG2P gene, HI: Haploinsufficiency index (in red if <10%)

Shaded rows: Protein coding genes located within the same hESC topologically associated domain (TAD)<sup>25</sup> with the breakpoints

**Table S28. Convergent Genomic Analysis of DGAP295 2p13.3 breakpoints**

| DGAP295: 2p13.3 breakpoints on Rearrangement_D: 69,588,420~ and Rearrangement_E: 69,588,264~ |                           |                                                       |                    |                           |                     |                  |                                                                                                                                     |
|----------------------------------------------------------------------------------------------|---------------------------|-------------------------------------------------------|--------------------|---------------------------|---------------------|------------------|-------------------------------------------------------------------------------------------------------------------------------------|
| Genes                                                                                        | Nucleotides (GRCh37/hg19) | Description                                           | OMIM <sup>26</sup> | OMIM Morbid <sup>26</sup> | DDG2P <sup>27</sup> | %HI <sup>8</sup> | Notes                                                                                                                               |
| <i>GFPT1</i> (Disrupted)                                                                     | 69546905-69614382         | Glutamine--Fructose-6-Phosphate Transaminase 1        | +                  | +                         | -                   | 22.36            | Biallelic loss of function (autosomal recessive) associated with congenital myasthenia, type 12 <sup>96</sup>                       |
| <i>NFU1</i>                                                                                  | 69622882-69664760         | NFU1 Iron-Sulfur Cluster Scaffold                     | +                  | +                         | +                   | 7.52             | Biallelic loss of function (autosomal recessive) associated with multiple mitochondrial dysfunctions syndrome, type 1 <sup>97</sup> |
| <i>AAK1</i>                                                                                  | 69688532-69901481         | AP2 Associated Kinase 1                               | +                  | -                         | -                   | 27.81            |                                                                                                                                     |
| <i>ANXA4</i>                                                                                 | 69871557-70053596         | Annexin A4                                            | +                  | -                         | -                   | 36.41            |                                                                                                                                     |
| <i>GMCL1</i>                                                                                 | 70056774-70108528         | Germ Cell-Less, Spermatogenesis Associated 1          | -                  | -                         | -                   | 27.55            |                                                                                                                                     |
| <i>SNRNP27</i>                                                                               | 70120692-70132707         | Small Nuclear Ribonucleoprotein 27 kda (U4/U6.U5)     | -                  | -                         | -                   | 21.9             |                                                                                                                                     |
| <i>MXD1</i>                                                                                  | 70124820-70170077         | MAX Dimerization Protein 1                            | +                  | -                         | -                   | 19.62            |                                                                                                                                     |
| <i>ASPRV1</i>                                                                                | 70187226-70189397         | Aspartic Peptidase, Retroviral-Like 1                 | +                  | -                         | -                   | 44.23            |                                                                                                                                     |
| <i>PCBP1</i>                                                                                 | 70314585-70316332         | Poly(Rc) Binding Protein 1                            | +                  | -                         | -                   | 22.38            |                                                                                                                                     |
| <i>C2orf42</i>                                                                               | 70377012-70475747         | Chromosome 2 Open Reading Frame 42                    | -                  | -                         | -                   | 28.59            |                                                                                                                                     |
| <i>TIA1</i>                                                                                  | 70436576-70475792         | TIA1 Cytotoxic Granule-Associated RNA Binding Protein | +                  | +                         | -                   | 3.8              | Haploinsufficiency (autosomal dominant, monoallelic mode) associated with Welander distal myopathy <sup>98</sup>                    |
| <i>PCYOX1</i>                                                                                | 70484518-70508323         | Prenylcysteine Oxidase 1                              | +                  | -                         | -                   | 55.49            |                                                                                                                                     |

DDG2P: Developmental Disorders Genotype-to-Phenotype Database, +: Confirmed DDG2P gene, HI: Haploinsufficiency index (in red if <10%)

Shaded rows: Protein coding genes located within the same hESC topologically associated domain (TAD)<sup>25</sup> with the breakpoints

**Table S29. Convergent Genomic Analysis of DGAP295 11p15.5 breakpoints**

| DGAP295: 11p15.5 Breakpoints on Rearrangement_A (1,915,057~ and 1,936,993~), Rearrangement_B (1,960,727~ and 1,936,668~), Rearrangement_C (1,915,843~ and 1,961,361~), Rearrangement_D (1,984,895~), and Rearrangement_E (1,985,019~) |                           |                                                    |                    |                           |                     |                  |       |
|---------------------------------------------------------------------------------------------------------------------------------------------------------------------------------------------------------------------------------------|---------------------------|----------------------------------------------------|--------------------|---------------------------|---------------------|------------------|-------|
| Gene                                                                                                                                                                                                                                  | Nucleotides (GRCh37/hg19) | Description                                        | OMIM <sup>26</sup> | OMIM Morbid <sup>26</sup> | DDG2P <sup>27</sup> | %HI <sup>8</sup> | Notes |
| <i>TSPAN4</i>                                                                                                                                                                                                                         | 842808-867116             | Tetraspanin 4                                      | +                  | -                         | -                   | 71.26            |       |
| <i>CHID1</i>                                                                                                                                                                                                                          | 867357-915058             | Chitinase Domain Containing 1                      | +                  | -                         | -                   | 70.14            |       |
| <i>AP2A2</i>                                                                                                                                                                                                                          | 924894-1012239            | Adaptor-Related Protein Complex 2, Alpha 2 Subunit | +                  | -                         | -                   | 72.44            |       |
| <i>MUC6</i>                                                                                                                                                                                                                           | 1012821-1036706           | Mucin 6, Oligomeric Mucus/Gel-Forming              | +                  | -                         | -                   | 92.04            |       |
| <i>MUC2</i>                                                                                                                                                                                                                           | 1074875-1104419           | Mucin 2, Oligomeric Mucus/Gel-Forming              | +                  | -                         | -                   | 78.34            |       |
| <i>MUC5AC</i>                                                                                                                                                                                                                         | 1151580-1222364           | Mucin 5AC, Oligomeric Mucus/Gel-Forming            | +                  | -                         | -                   | 82.42            |       |
| <i>MUC5B</i>                                                                                                                                                                                                                          | 1244296-1283406           | Mucin 5B, Oligomeric Mucus/Gel-Forming             | +                  | +                         | -                   | 94.15            |       |
| <i>TOLLIP</i>                                                                                                                                                                                                                         | 1295601-1330884           | Toll Interacting Protein                           | +                  | -                         | -                   | 45.23            |       |
| <i>BRSK2</i>                                                                                                                                                                                                                          | 1411129-1483919           | BR Serine/Threonine Kinase 2                       | +                  | -                         | -                   | 60.26            |       |
| <i>MOB2</i>                                                                                                                                                                                                                           | 1490687-1522477           | MOB Kinase Activator 2                             | +                  | -                         | -                   | 62.66            |       |
| <i>DUSP8</i>                                                                                                                                                                                                                          | 1575274-1593150           | Dual Specificity Phosphatase 8                     | +                  | -                         | -                   | 69.59            |       |
| <i>KRTAP5-1</i>                                                                                                                                                                                                                       | 1605572-1606513           | Keratin Associated Protein 5-1                     | +                  | -                         | -                   | 82.35            |       |
| <i>KRTAP5-2</i>                                                                                                                                                                                                                       | 1618409-1619524           | Keratin Associated Protein 5-2                     | -                  | -                         | -                   | 76.65            |       |
| <i>KRTAP5-3</i>                                                                                                                                                                                                                       | 1628795-1629693           | Keratin Associated Protein 5-3                     | -                  | -                         | -                   | 84.7             |       |
| <i>KRTAP5-4</i>                                                                                                                                                                                                                       | 1642188-1643368           | Keratin Associated Protein 5-4                     | -                  | -                         | -                   | 84.14            |       |
| <i>KRTAP5-5</i>                                                                                                                                                                                                                       | 1651033-1652160           | Keratin Associated Protein 5-5                     | -                  | -                         | -                   | 76.4             |       |
| <i>KRTAP5-6</i>                                                                                                                                                                                                                       | 1718425-1718985           | Keratin Associated Protein 5-6                     | -                  | -                         | -                   | 68.6             |       |
| <i>IFITM10</i>                                                                                                                                                                                                                        | 1753640-1771821           | Interferon Induced Transmembrane Protein 10        | -                  | -                         | -                   | 80.26            |       |
| <i>CTSD</i>                                                                                                                                                                                                                           | 1773982-1785222           | Cathepsin D                                        | +                  | +                         | +                   | 51.46            |       |
| <i>SYT8</i>                                                                                                                                                                                                                           | 1848709-1858751           | Synaptotagmin VIII                                 | +                  | -                         | -                   | 92.25            |       |
| <i>TNNI2</i>                                                                                                                                                                                                                          | 1860219-1862910           | Troponin I Type 2 (Skeletal, Fast)                 | +                  | +                         | -                   | 67.71            |       |
| <i>LSP1</i>                                                                                                                                                                                                                           | 1874200-1913497           | Lymphocyte-Specific Protein 1                      | +                  | -                         | -                   | 87.89            |       |
| <i>PRR33</i>                                                                                                                                                                                                                          | 1910375-                  | Proline Rich 33                                    | -                  | -                         | -                   | 93.45            |       |

|                 |                 |                                                                    |   |   |   |       |                                                                                                                                       |
|-----------------|-----------------|--------------------------------------------------------------------|---|---|---|-------|---------------------------------------------------------------------------------------------------------------------------------------|
|                 | 1912084         |                                                                    |   |   |   |       |                                                                                                                                       |
| <i>TNNT3</i>    | 1940792-1959936 | Troponin T Type 3 (Skeletal, Fast)                                 | + | + | - | 54.88 |                                                                                                                                       |
| <i>MRPL23</i>   | 1968508-2005752 | Mitochondrial Ribosomal Protein L23                                | + | - | - | 79.39 |                                                                                                                                       |
| <i>IGF2</i>     | 2150342-2170833 | Insulin-Like Growth Factor 2                                       | + | + | + | 79.01 | Imprinted loss of function (epimutation) is associated with Silver-Russel Syndrome <sup>24</sup> (overlapping phenotype with DGAP295) |
| <i>INS</i>      | 2181009-2182571 | Insulin                                                            | + | + | - | 80.96 |                                                                                                                                       |
| <i>TH</i>       | 2185159-2193107 | Tyrosine Hydroxylase                                               | + | + | + | 6.58  |                                                                                                                                       |
| <i>ASCL2</i>    | 2289725-2292182 | Achaete-Scute Family Bhlh Transcription Factor 2                   | + | - | - | 71.06 |                                                                                                                                       |
| <i>C11orf21</i> | 2316875-2324279 | Chromosome 11 Open Reading Frame 21                                | + | - | - | 98.55 |                                                                                                                                       |
| <i>TSPAN32</i>  | 2323227-2339430 | Tetraspanin 32                                                     | + | - | - | 90.86 |                                                                                                                                       |
| <i>CD81</i>     | 2397407-2418649 | CD81 Molecule                                                      | + | + | - | 64.93 |                                                                                                                                       |
| <i>TSSC4</i>    | 2421718-2425106 | Tumor Suppressing Subtransferable Candidate 4                      | + | - | - | 88.63 |                                                                                                                                       |
| <i>TRPM5</i>    | 2425745-2444275 | Transient Receptor Potential Cation Channel, Subfamily M, Member 5 | + | - | - | 76.97 |                                                                                                                                       |

DDG2P: Developmental Disorders Genotype-to-Phenotype Database, +: Confirmed DDG2P gene, HI: Haploinsufficiency index (in red if <10%)

Shaded rows: Protein coding genes located within the same hESC topologically associated domain (TAD)<sup>25</sup> with the breakpoints

## REFERENCES

1. Talkowski, M.E., Ordulu, Z., Pillalamarri, V., Benson, C.B., Blumenthal, I., Connolly, S., Hanscom, C., Hussain, N., Pereira, S., Picker, J., et al. (2012). Clinical diagnosis by whole-genome sequencing of a prenatal sample. *N Engl J Med* 367, 2226-2232.
2. Pagon, R.A., Graham, J.M., Jr., Zonana, J., and Yong, S.L. (1981). Coloboma, congenital heart disease, and choanal atresia with multiple anomalies: CHARGE association. *J Pediatr* 99, 223-227.
3. Blake, K.D., Davenport, S.L., Hall, B.D., Hefner, M.A., Pagon, R.A., Williams, M.S., Lin, A.E., and Graham, J.M., Jr. (1998). CHARGE association: an update and review for the primary pediatrician. *Clin Pediatr (Phila)* 37, 159-173.
4. Verloes, A. (2005). Updated diagnostic criteria for CHARGE syndrome: a proposal. *Am J Med Genet A* 133A, 306-308.
5. Brown, G.C. (1982). Optic nerve hypoplasia and colobomatous defects. *J Pediatr Ophthalmol Strabismus* 19, 90-93.
6. Maumenee, I.H., and Mitchell, T.N. (1990). Colobomatous malformations of the eye. *Trans Am Ophthalmol Soc* 88, 123-132; discussion 133-125.
7. Suzuki, Y., Kawase, E., Nishina, S., and Azuma, N. (2006). Two patients with different features of congenital optic disc anomalies in the two eyes. *Graefes Arch Clin Exp Ophthalmol* 244, 259-261.
8. Huang, N., Lee, I., Marcotte, E.M., and Hurler, M.E. (2010). Characterising and predicting haploinsufficiency in the human genome. *PLoS Genet* 6, e1001154.
9. Bowman, G.D., O'Donnell, M., and Kuriyan, J. (2004). Structural analysis of a eukaryotic sliding DNA clamp-clamp loader complex. *Nature* 429, 724-730.
10. Castermans, D., Wilquet, V., Parthoens, E., Huysmans, C., Steyaert, J., Swinnen, L., Fryns, J.P., Van de Ven, W., and Devriendt, K. (2003). The neurobeachin gene is disrupted by a translocation in a patient with idiopathic autism. *J Med Genet* 40, 352-356.
11. Wise, A., Tenezaca, L., Fernandez, R.W., Schatoff, E., Flores, J., Ueda, A., Zhong, X., Wu, C.F., Simon, A.F., and Venkatesh, T. (2015). *Drosophila* mutants of the autism candidate gene neurobeachin (*rugose*) exhibit neurodevelopmental disorders, aberrant synaptic properties, altered locomotion, impaired adult social behavior and activity patterns. *J Neurogenet*, 1-34.
12. Nuytens, K., Gantois, I., Stijnen, P., Iscru, E., Laeremans, A., Serneels, L., Van Eylen, L., Liebhaber, S.A., Devriendt, K., Balschun, D., et al. (2013). Haploinsufficiency of the autism candidate gene Neurobeachin induces autism-like behaviors and affects cellular and molecular processes of synaptic plasticity in mice. *Neurobiol Dis* 51, 144-151.
13. Lauren, J., Airaksinen, M.S., Saarma, M., and Timusk, T. (2003). A novel gene family encoding leucine-rich repeat transmembrane proteins differentially expressed in the nervous system. *Genomics* 81, 411-421.
14. Fernandez, B.A., Siegel-Bartelt, J., Herbrick, J.A., Teshima, I., and Scherer, S.W. (2005). Holoprosencephaly and cleidocranial dysplasia in a patient due to two position-effect mutations: case report and review of the literature. *Clin Genet* 68, 349-359.
15. Le Meur, N., Holder-Espinasse, M., Jaillard, S., Goldenberg, A., Joriot, S., Amati-Bonneau, P., Guichet, A., Barth, M., Charollais, A., Journal, H., et al. (2010). MEF2C haploinsufficiency caused by either microdeletion of the 5q14.3 region or mutation is responsible for severe mental retardation with stereotypic movements, epilepsy and/or cerebral malformations. *J Med Genet* 47, 22-29.
16. Alvarez, J.D., Yasui, D.H., Niida, H., Joh, T., Loh, D.Y., and Kohwi-Shigematsu, T. (2000). The MAR-binding protein SATB1 orchestrates temporal and spatial expression of multiple genes during T-cell development. *Genes Dev* 14, 521-535.
17. Kohwi-Shigematsu, T., Kohwi, Y., Takahashi, K., Richards, H.W., Ayers, S.D., Han, H.J., and Cai, S. (2012). SATB1-mediated functional packaging of chromatin into loops. *Methods* 58, 243-254.
18. Chen, H., Rossier, C., and Antonarakis, S.E. (1996). Cloning of a human homolog of the *Drosophila* enhancer of zeste gene (*EZH2*) that maps to chromosome 21q22.2. *Genomics* 38, 30-37.
19. Jungbluth, H., Wallgren-Pettersson, C., and Laporte, J. (2008). Centronuclear (myotubular) myopathy. *Orphanet J Rare Dis* 3, 26.
20. Joseph, M., Pai, G.S., Holden, K.R., and Herman, G. (1995). X-linked myotubular myopathy: clinical observations in ten additional cases. *Am J Med Genet* 59, 168-173.
21. Gordon, C.T., Tan, T.Y., Benko, S., Fitzpatrick, D., Lyonnet, S., and Farlie, P.G. (2009). Long-range regulation at the *SOX9* locus in development and disease. *J Med Genet* 46, 649-656.

22. Benko, S., Fantes, J.A., Amiel, J., Kleinjan, D.J., Thomas, S., Ramsay, J., Jamshidi, N., Essafi, A., Heaney, S., Gordon, C.T., et al. (2009). Highly conserved non-coding elements on either side of SOX9 associated with Pierre Robin sequence. *Nat Genet* 41, 359-364.
23. Amarillo, I.E., Dipple, K.M., and Quintero-Rivera, F. (2013). Familial microdeletion of 17q24.3 upstream of SOX9 is associated with isolated Pierre Robin sequence due to position effect. *Am J Med Genet A* 161A, 1167-1172.
24. Gicquel, C., Rossignol, S., Cabrol, S., Houang, M., Steunou, V., Barbu, V., Danton, F., Thibaud, N., Le Merrer, M., Burglen, L., et al. (2005). Epimutation of the telomeric imprinting center region on chromosome 11p15 in Silver-Russell syndrome. *Nat Genet* 37, 1003-1007.
25. Dixon, J.R., Selvaraj, S., Yue, F., Kim, A., Li, Y., Shen, Y., Hu, M., Liu, J.S., and Ren, B. (2012). Topological domains in mammalian genomes identified by analysis of chromatin interactions. *Nature* 485, 376-380.
26. Amberger, J.S., Bocchini, C.A., Schiettecatte, F., Scott, A.F., and Hamosh, A. (2015). OMIM.org: Online Mendelian Inheritance in Man (OMIM(R)), an online catalog of human genes and genetic disorders. *Nucleic Acids Res* 43, D789-798.
27. Bragin, E., Chatzimichali, E.A., Wright, C.F., Hurler, M.E., Firth, H.V., Bevan, A.P., and Swaminathan, G.J. (2014). DECIPHER: database for the interpretation of phenotype-linked plausibly pathogenic sequence and copy-number variation. *Nucleic Acids Res* 42, D993-D1000.
28. Shiratsuchi, T., Nishimori, H., Ichise, H., Nakamura, Y., and Tokino, T. (1997). Cloning and characterization of BAI2 and BAI3, novel genes homologous to brain-specific angiogenesis inhibitor 1 (BAI1). *Cytogenet Cell Genet* 79, 103-108.
29. Rutsch, F., Gailus, S., Miousse, I.R., Suormala, T., Sagne, C., Toliat, M.R., Nurnberg, G., Wittkamp, T., Buers, I., Sharifi, A., et al. (2009). Identification of a putative lysosomal cobalamin exporter altered in the cblF defect of vitamin B12 metabolism. *Nat Genet* 41, 234-239.
30. Czarny-Ratajczak, M., Lohiniva, J., Rogala, P., Kozlowski, K., Perala, M., Carter, L., Spector, T.D., Kolodziej, L., Seppanen, U., Glazar, R., et al. (2001). A mutation in COL9A1 causes multiple epiphyseal dysplasia: further evidence for locus heterogeneity. *Am J Hum Genet* 69, 969-980.
31. Grant, A.V., El Baghdadi, J., Sabri, A., El Azbaoui, S., Alaoui-Tahiri, K., Abderrahmani Rhorfi, I., Gharbaoui, Y., Abid, A., Benkirane, M., Raharimanga, V., et al. (2013). Age-dependent association between pulmonary tuberculosis and common TOX variants in the 8q12-13 linkage region. *Am J Hum Genet* 92, 407-414.
32. Najmabadi, H., Hu, H., Garshasbi, M., Zemojtel, T., Abedini, S.S., Chen, W., Hosseini, M., Behjati, F., Haas, S., Jamali, P., et al. (2011). Deep sequencing reveals 50 novel genes for recessive cognitive disorders. *Nature* 478, 57-63.
33. Janssen, N., Bergman, J.E., Swertz, M.A., Tranebjaerg, L., Lodahl, M., Schoots, J., Hofstra, R.M., van Ravenswaaij-Arts, C.M., and Hoefsloot, L.H. (2012). Mutation update on the CHD7 gene involved in CHARGE syndrome. *Hum Mutat* 33, 1149-1160.
34. Haddad, R., Uwaydat, S., Dakroub, R., and Traboulsi, E.I. (2001). Confirmation of the autosomal recessive syndrome of ectopia lentis and distinctive craniofacial appearance. *Am J Med Genet* 99, 185-189.
35. Ouahchi, K., Arita, M., Kayden, H., Hentati, F., Ben Hamida, M., Sokol, R., Arai, H., Inoue, K., Mandel, J.L., and Koenig, M. (1995). Ataxia with isolated vitamin E deficiency is caused by mutations in the alpha-tocopherol transfer protein. *Nat Genet* 9, 141-145.
36. Gineau, L., Cognet, C., Kara, N., Lach, F.P., Dunne, J., Veturi, U., Picard, C., Trouillet, C., Eidenschenk, C., Aoufouchi, S., et al. (2012). Partial MCM4 deficiency in patients with growth retardation, adrenal insufficiency, and natural killer cell deficiency. *J Clin Invest* 122, 821-832.
37. Sanchez-Martin, M., Perez-Losada, J., Rodriguez-Garcia, A., Gonzalez-Sanchez, B., Korf, B.R., Kuster, W., Moss, C., Spritz, R.A., and Sanchez-Garcia, I. (2003). Deletion of the SLUG (SNAI2) gene results in human piebaldism. *Am J Med Genet A* 122A, 125-132.
38. Sanchez-Martin, M., Rodriguez-Garcia, A., Perez-Losada, J., Sagrera, A., Read, A.P., and Sanchez-Garcia, I. (2002). SLUG (SNAI2) deletions in patients with Waardenburg disease. *Hum Mol Genet* 11, 3231-3236.
39. Wooster, R., Bignell, G., Lancaster, J., Swift, S., Seal, S., Mangion, J., Collins, N., Gregory, S., Gumbs, C., and Micklem, G. (1995). Identification of the breast cancer susceptibility gene BRCA2. *Nature* 378, 789-792.
40. Alter, B.P., Rosenberg, P.S., and Brody, L.C. (2007). Clinical and molecular features associated with biallelic mutations in FANCD1/BRCA2. *J Med Genet* 44, 1-9.

41. Ichikawa, S., Imel, E.A., Kreiter, M.L., Yu, X., Mackenzie, D.S., Sorenson, A.H., Goetz, R., Mohammadi, M., White, K.E., and Econs, M.J. (2007). A homozygous missense mutation in human KLOTTHO causes severe tumoral calcinosis. *J Clin Invest* 117, 2684-2691.
42. Collaborative Linkage Study of, A. (2001). An autosomal genomic screen for autism. *Am J Med Genet* 105, 609-615.
43. Lin, P.T., Gleeson, J.G., Corbo, J.C., Flanagan, L., and Walsh, C.A. (2000). DCAMKL1 encodes a protein kinase with homology to doublecortin that regulates microtubule polymerization. *J Neurosci* 20, 9152-9161.
44. Patel, H., Cross, H., Proukakis, C., Hershberger, R., Bork, P., Ciccarelli, F.D., Patton, M.A., McKusick, V.A., and Crosby, A.H. (2002). SPG20 is mutated in Troyer syndrome, an hereditary spastic paraplegia. *Nat Genet* 31, 347-348.
45. Villard, J., Lisowska-Grospierre, B., van den Elsen, P., Fischer, A., Reith, W., and Mach, B. (1997). Mutation of RFXAP, a regulator of MHC class II genes, in primary MHC class II deficiency. *N Engl J Med* 337, 748-753.
46. Shintani, M., Yagi, H., Nakayama, T., Saji, T., and Matsuoka, R. (2009). A new nonsense mutation of SMAD8 associated with pulmonary arterial hypertension. *J Med Genet* 46, 331-337.
47. Boczonadi, V., Muller, J.S., Pyle, A., Munkley, J., Dor, T., Quartararo, J., Ferrero, I., Karcagi, V., Giunta, M., Polvikoski, T., et al. (2014). EXOSC8 mutations alter mRNA metabolism and cause hypomyelination with spinal muscular atrophy and cerebellar hypoplasia. *Nat Commun* 5, 4287.
48. Berry, F.B., Lines, M.A., Oas, J.M., Footz, T., Underhill, D.A., Gage, P.J., and Walter, M.A. (2006). Functional interactions between FOXC1 and PITX2 underlie the sensitivity to FOXC1 gene dose in Axenfeld-Rieger syndrome and anterior segment dysgenesis. *Hum Mol Genet* 15, 905-919.
49. Nishimura, D.Y., Searby, C.C., Alward, W.L., Walton, D., Craig, J.E., Mackey, D.A., Kawase, K., Kanis, A.B., Patil, S.R., Stone, E.M., et al. (2001). A spectrum of FOXC1 mutations suggests gene dosage as a mechanism for developmental defects of the anterior chamber of the eye. *Am J Hum Genet* 68, 364-372.
50. Aldinger, K.A., Lehmann, O.J., Hudgins, L., Chizhikov, V.V., Bassuk, A.G., Ades, L.C., Krantz, I.D., Dobyns, W.B., and Millen, K.J. (2009). FOXC1 is required for normal cerebellar development and is a major contributor to chromosome 6p25.3 Dandy-Walker malformation. *Nat Genet* 41, 1037-1042.
51. Lee, S., Takeda, Y., Kawano, H., Hosoya, H., Nomoto, M., Fujimoto, D., Takahashi, N., and Watanabe, K. (2000). Expression and regulation of a gene encoding neural recognition molecule NB-3 of the contactin/F3 subgroup in mouse brain. *Gene* 245, 253-266.
52. Fernandez, T., Morgan, T., Davis, N., Klin, A., Morris, A., Farhi, A., Lifton, R.P., and State, M.W. (2004). Disruption of contactin 4 (CNTN4) results in developmental delay and other features of 3p deletion syndrome. *Am J Hum Genet* 74, 1286-1293.
53. Pomponio, R.J., Coskun, T., Demirkol, M., Tokatli, A., Ozalp, I., Huner, G., Baykal, T., and Wolf, B. (2000). Novel mutations cause biotinidase deficiency in Turkish children. *J Inherit Metab Dis* 23, 120-128.
54. Balamotis, M.A., Tamberg, N., Woo, Y.J., Li, J., Davy, B., Kohwi-Shigematsu, T., and Kohwi, Y. (2012). Satb1 ablation alters temporal expression of immediate early genes and reduces dendritic spine density during postnatal brain development. *Mol Cell Biol* 32, 333-347.
55. Close, J., Xu, H., De Marco Garcia, N., Batista-Brito, R., Rossignol, E., Rudy, B., and Fishell, G. (2012). Satb1 is an activity-modulated transcription factor required for the terminal differentiation and connectivity of medial ganglionic eminence-derived cortical interneurons. *J Neurosci* 32, 17690-17705.
56. Eerola, I., Boon, L.M., Mulliken, J.B., Burrows, P.E., Domp Martin, A., Watanabe, S., Vanwijck, R., and Vikkula, M. (2003). Capillary malformation-arteriovenous malformation, a new clinical and genetic disorder caused by RASA1 mutations. *Am J Hum Genet* 73, 1240-1249.
57. Saitsu, H., Igarashi, N., Kato, M., Okada, I., Kosho, T., Shimokawa, O., Sasaki, Y., Nishiyama, K., Tsurusaki, Y., Doi, H., et al. (2011). De novo 5q14.3 translocation 121.5-kb upstream of MEF2C in a patient with severe intellectual disability and early-onset epileptic encephalopathy. *Am J Med Genet A* 155A, 2879-2884.
58. Nowakowska, B.A., Obersztyrn, E., Szymanska, K., Bekiesinska-Figatowska, M., Xia, Z., Ricks, C.B., Bocian, E., Stockton, D.W., Szczaluba, K., Nawara, M., et al. (2010). Severe mental retardation, seizures, and hypotonia due to deletions of MEF2C. *Am J Med Genet B Neuropsychiatr Genet* 153B, 1042-1051.
59. Barbosa, A.C., Kim, M.S., Ertunc, M., Adachi, M., Nelson, E.D., McAnally, J., Richardson, J.A., Kavalali, E.T., Monteggia, L.M., Bassel-Duby, R., et al. (2008). MEF2C, a transcription factor that facilitates learning and memory by negative regulation of synapse numbers and function. *Proc Natl Acad Sci U S A* 105, 9391-9396.

60. Middendorp, S., Paoletti, A., Schiebel, E., and Bornens, M. (1997). Identification of a new mammalian centrin gene, more closely related to *Saccharomyces cerevisiae* CDC31 gene. *Proc Natl Acad Sci U S A* 94, 9141-9146.
61. Abadie, C., Blanchet, C., Baux, D., Larrieu, L., Besnard, T., Ravel, P., Biboulet, R., Hamel, C., Malcolm, S., Mondain, M., et al. (2012). Audiological findings in 100 USH2 patients. *Clin Genet* 82, 433-438.
62. Arking, D.E., Cutler, D.J., Brune, C.W., Teslovich, T.M., West, K., Ikeda, M., Rea, A., Guy, M., Lin, S., Cook, E.H., et al. (2008). A common genetic variant in the neurexin superfamily member CNTNAP2 increases familial risk of autism. *Am J Hum Genet* 82, 160-164.
63. Strauss, K.A., Puffenberger, E.G., Huentelman, M.J., Gottlieb, S., Dobrin, S.E., Parod, J.M., Stephan, D.A., and Morton, D.H. (2006). Recessive symptomatic focal epilepsy and mutant contactin-associated protein-like 2. *N Engl J Med* 354, 1370-1377.
64. Zweier, C., de Jong, E.K., Zweier, M., Orrico, A., Ousager, L.B., Collins, A.L., Bijlsma, E.K., Oortveld, M.A., Ekici, A.B., Reis, A., et al. (2009). CNTNAP2 and NRXN1 are mutated in autosomal-recessive Pitt-Hopkins-like mental retardation and determine the level of a common synaptic protein in *Drosophila*. *Am J Hum Genet* 85, 655-666.
65. Yu, Z.K., Gervais, J.L., and Zhang, H. (1998). Human CUL-1 associates with the SKP1/SKP2 complex and regulates p21(CIP1/WAF1) and cyclin D proteins. *Proc Natl Acad Sci U S A* 95, 11324-11329.
66. Di Meglio, T., Kratochwil, C.F., Vilain, N., Loche, A., Vitobello, A., Yonehara, K., Hrycaj, S.M., Roska, B., Peters, A.H., Eichmann, A., et al. (2013). Ezh2 orchestrates topographic migration and connectivity of mouse precerebellar neurons. *Science* 339, 204-207.
67. Belloni, E., Muenke, M., Roessler, E., Traverso, G., Siegel-Bartelt, J., Frumkin, A., Mitchell, H.F., Donis-Keller, H., Helms, C., Hing, A.V., et al. (1996). Identification of Sonic hedgehog as a candidate gene responsible for holoprosencephaly. *Nat Genet* 14, 353-356.
68. Anderson, E., Devenney, P.S., Hill, R.E., and Lettice, L.A. (2014). Mapping the Shh long-range regulatory domain. *Development* 141, 3934-3943.
69. Ross, A.J., Ruiz-Perez, V., Wang, Y., Hagan, D.M., Scherer, S., Lynch, S.A., Lindsay, S., Custard, E., Belloni, E., Wilson, D.I., et al. (1998). A homeobox gene, HLXB9, is the major locus for dominantly inherited sacral agenesis. *Nat Genet* 20, 358-361.
70. Choucair, N., Mignon-Ravix, C., Cacciagli, P., Abou Ghoch, J., Fawaz, A., Megarbane, A., Villard, L., and Chouery, E. (2015). Evidence that homozygous PTPRD gene microdeletion causes trigonocephaly, hearing loss, and intellectual disability. *Mol Cytogenet* 8, 39.
71. Uetani, N., Kato, K., Ogura, H., Mizuno, K., Kawano, K., Mikoshiba, K., Yakura, H., Asano, M., and Iwakura, Y. (2000). Impaired learning with enhanced hippocampal long-term potentiation in PTPdelta-deficient mice. *EMBO J* 19, 2775-2785.
72. Li, J.M., Lu, C.L., Cheng, M.C., Luu, S.U., Hsu, S.H., and Chen, C.H. (2013). Genetic analysis of the DLGAP1 gene as a candidate gene for schizophrenia. *Psychiatry Res* 205, 13-17.
73. Aldinger, K.A., Mosca, S.J., Tetreault, M., Dempsey, J.C., Ishak, G.E., Hartley, T., Phelps, I.G., Lamont, R.E., O'Day, D.R., Basel, D., et al. (2014). Mutations in LAMA1 cause cerebellar dysplasia and cysts with and without retinal dystrophy. *Am J Hum Genet* 95, 227-234.
74. Sudhir, P.R., Lin, S.T., Chia-Wen, C., Yang, S.H., Li, A.F., Lai, R.H., Wang, M.J., Chen, Y.T., Chen, C.F., Jou, Y.S., et al. (2015). Loss of PTPRM associates with the pathogenic development of colorectal adenoma-carcinoma sequence. *Sci Rep* 5, 9633.
75. Zweier, C., Peippo, M.M., Hoyer, J., Sousa, S., Bottani, A., Clayton-Smith, J., Reardon, W., Saraiva, J., Cabral, A., Gohring, I., et al. (2007). Haploinsufficiency of TCF4 causes syndromal mental retardation with intermittent hyperventilation (Pitt-Hopkins syndrome). *Am J Hum Genet* 80, 994-1001.
76. Kawabe, H., Sakisaka, T., Yasumi, M., Shingai, T., Izumi, G., Nagano, F., Deguchi-Tawarada, M., Takeuchi, M., Nakanishi, H., and Takai, Y. (2003). A novel rabconnectin-3-binding protein that directly binds a GDP/GTP exchange protein for Rab3A small G protein implicated in Ca(2+)-dependent exocytosis of neurotransmitter. *Genes Cells* 8, 537-546.
77. Bull, L.N., van Eijk, M.J., Pawlikowska, L., DeYoung, J.A., Juijn, J.A., Liao, M., Klomp, L.W., Lomri, N., Berger, R., Scharschmidt, B.F., et al. (1998). A gene encoding a P-type ATPase mutated in two forms of hereditary cholestasis. *Nat Genet* 18, 219-224.



78. Gao, S., Alarcon, C., Sapkota, G., Rahman, S., Chen, P.Y., Goerner, N., Macias, M.J., Erdjument-Bromage, H., Tempst, P., and Massague, J. (2009). Ubiquitin ligase Nedd4L targets activated Smad2/3 to limit TGF-beta signaling. *Mol Cell* 36, 457-468.
79. Tanabe, S., Bohlander, S.K., Vignon, C.V., Espinosa, R., 3rd, Zhao, N., Strissel, P.L., Zeleznik-Le, N.J., and Rowley, J.D. (1996). AF10 is split by MLL and HEAB, a human homolog to a putative *Caenorhabditis elegans* ATP/GTP-binding protein in an inv(10;11)(p12;q23q12). *Blood* 88, 3535-3545.
80. Leung, C., Lingbeek, M., Shakhova, O., Liu, J., Tanger, E., Saremaslani, P., Van Lohuizen, M., and Marino, S. (2004). Bmi1 is essential for cerebellar development and is overexpressed in human medulloblastomas. *Nature* 428, 337-341.
81. Sellick, G.S., Barker, K.T., Stolte-Dijkstra, I., Fleischmann, C., Coleman, R.J., Garrett, C., Gloyn, A.L., Edghill, E.L., Hattersley, A.T., Wellauer, P.K., et al. (2004). Mutations in PTF1A cause pancreatic and cerebellar agenesis. *Nat Genet* 36, 1301-1305.
82. Ostergaard, P., Simpson, M.A., Mendola, A., Vasudevan, P., Connell, F.C., van Impel, A., Moore, A.T., Loeys, B.L., Ghalamkarpour, A., Onoufriadis, A., et al. (2012). Mutations in KIF11 cause autosomal-dominant microcephaly variably associated with congenital lymphedema and chorioretinopathy. *Am J Hum Genet* 90, 356-362.
83. Slavotinek, A.M., Mehrotra, P., Nazarenko, I., Tang, P.L., Lao, R., Cameron, D., Li, B., Chu, C., Chou, C., Marqueling, A.L., et al. (2013). Focal facial dermal dysplasia, type IV, is caused by mutations in CYP26C1. *Hum Mol Genet* 22, 696-703.
84. Young, I.D., and Harper, P.S. (1982). Incidence of Hunter's syndrome. *Hum Genet* 60, 391-392.
85. Fukami, M., Wada, Y., Miyabayashi, K., Nishino, I., Hasegawa, T., Nordenskjold, A., Camerino, G., Kretz, C., Buj-Bello, A., Laporte, J., et al. (2006). CXorf6 is a causative gene for hypospadias. *Nat Genet* 38, 1369-1371.
86. Buj-Bello, A., Biancalana, V., Moutou, C., Laporte, J., and Mandel, J.L. (1999). Identification of novel mutations in the MTM1 gene causing severe and mild forms of X-linked myotubular myopathy. *Hum Mutat* 14, 320-325.
87. Scott, A.F., Mohr, D.W., Kasch, L.M., Barton, J.A., Pittiglio, R., Ingersoll, R., Craig, B., Marosy, B.A., Doheny, K.F., Bromley, W.C., et al. (2014). Identification of an HMGB3 frameshift mutation in a family with an X-linked colobomatous microphthalmia syndrome using whole-genome and X-exome sequencing. *JAMA Ophthalmol* 132, 1215-1220.
88. Ramachandran, N., Munteanu, I., Wang, P., Aubourg, P., Rilstone, J.J., Israelian, N., Naranian, T., Paroutis, P., Guo, R., Ren, Z.P., et al. (2009). VMA21 deficiency causes an autophagic myopathy by compromising V-ATPase activity and lysosomal acidification. *Cell* 137, 235-246.
89. Hurvitz, J.R., Suwairi, W.M., Van Hul, W., El-Shanti, H., Superti-Furga, A., Roudier, J., Holderbaum, D., Pauli, R.M., Herd, J.K., Van Hul, E.V., et al. (1999). Mutations in the CCN gene family member WISP3 cause progressive pseudorheumatoid dysplasia. *Nat Genet* 23, 94-98.
90. Kwok, C., Weller, P.A., Guioli, S., Foster, J.W., Mansour, S., Zuffardi, O., Punnett, H.H., Dominguez-Steglich, M.A., Brook, J.D., Young, I.D., et al. (1995). Mutations in SOX9, the gene responsible for Campomelic dysplasia and autosomal sex reversal. *Am J Hum Genet* 57, 1028-1036.
91. Murakami, Y., Tawamie, H., Maeda, Y., Buttner, C., Buchert, R., Radwan, F., Schaffer, S., Sticht, H., Aigner, M., Reis, A., et al. (2014). Null mutation in PGAP1 impairing Gpi-anchor maturation in patients with intellectual disability and encephalopathy. *PLoS Genet* 10, e1004320.
92. Hansen, J.J., Durr, A., Cournu-Rebeix, I., Georgopoulos, C., Ang, D., Nielsen, M.N., Davoine, C.S., Brice, A., Fontaine, B., Gregersen, N., et al. (2002). Hereditary spastic paraplegia SPG13 is associated with a mutation in the gene encoding the mitochondrial chaperonin Hsp60. *Am J Hum Genet* 70, 1328-1332.
93. Thiffault, I., Rioux, M.F., Tetreault, M., Jarry, J., Loiselle, L., Poirier, J., Gros-Louis, F., Mathieu, J., Vanasse, M., Rouleau, G.A., et al. (2006). A new autosomal recessive spastic ataxia associated with frequent white matter changes maps to 2q33-34. *Brain* 129, 2332-2340.
94. Lemarchandel, V., Joulin, V., Valentin, C., Rosa, R., Galacteros, F., Rosa, J., and Cohen-Solal, M. (1992). Compound heterozygosity in a complete erythrocyte bisphosphoglycerate mutase deficiency. *Blood* 80, 2643-2649.
95. Luo, X., Kranzler, H.R., Zuo, L., Wang, S., Blumberg, H.P., and Gelernter, J. (2005). CHRM2 gene predisposes to alcohol dependence, drug dependence and affective disorders: results from an extended case-control structured association study. *Hum Mol Genet* 14, 2421-2434.

96. Senderek, J., Muller, J.S., Dusl, M., Strom, T.M., Guergueltcheva, V., Diepolder, I., Laval, S.H., Maxwell, S., Cossins, J., Krause, S., et al. (2011). Hexosamine biosynthetic pathway mutations cause neuromuscular transmission defect. *Am J Hum Genet* 88, 162-172.
97. Navarro-Sastre, A., Tort, F., Stehling, O., Uzarska, M.A., Arranz, J.A., Del Toro, M., Labayru, M.T., Landa, J., Font, A., Garcia-Villoria, J., et al. (2011). A fatal mitochondrial disease is associated with defective NFU1 function in the maturation of a subset of mitochondrial Fe-S proteins. *Am J Hum Genet* 89, 656-667.
98. Hackman, P., Sarparanta, J., Lehtinen, S., Vihola, A., Evila, A., Jonson, P.H., Luque, H., Kere, J., Screen, M., Chinnery, P.F., et al. (2013). Welander distal myopathy is caused by a mutation in the RNA-binding protein TIA1. *Ann Neurol* 73, 500-509.
